# Supplementary material for: A Human 3D neural assembloid model for SARS-CoV-2 infection
Source: Res Sq. 2021 Feb 12:rs.3.rs-214352. Preprint. [Version 1] doi: 10.21203/rs.3.rs-214352/v1 (PMC7885926; doi:10.21203/rs.3.rs-214352/v1)
Supplement: Supplement [file 1d98355b30264f5307ffa5d4.xlsx]

## Sheet: DEG  in Astrocytes
DEG in Astrocytes PCCO_Virus V.S. PCCO_MOCK
Gene Name	p_val avg_	logFC	PCCO_Virus	PCCO_MOCK
XIST	1.00198e-17	-1.51537	0	0.333
AC009107.2	9.14223e-17	0.479638	0.365	0.057
ARRDC3	1.35145e-13	0.479638	0.41	0.1
CPLX2	2.29244e-13	0.552798	0.281	0.043
KIF26B	9.08565e-12	0.369689	0.23	0.03
CDON	4.69697e-11	0.362263	0.433	0.137
DPYSL2	6.00565e-11	0.407023	0.933	0.763
DDX6	2.89207e-10	0.401604	0.657	0.31
RPS15	3.31452e-10	-0.315193	0.978	0.99
ENC1	7.17252e-10	0.474813	0.669	0.313
ISG15	5.90057e-11	1.27481	0.769	0.313
CRB1	7.81958e-10	0.287674	0.281	0.063
ZBTB20	1.02474e-09	0.414239	0.77	0.4
P4HA1	1.3188e-09	0.457657	0.551	0.253
MTRNR2L1	1.3463e-09	0.385734	0.438	0.157
YPEL1	2.43668e-09	0.31487	0.309	0.083
RPS4Y1	2.50449e-09	0.32017	0.624	0.287
SMIM14	2.66747e-09	0.341816	0.371	0.12
EIF1AY	5.51257e-09	0.304756	0.348	0.107
POU3F3	6.42635e-09	0.353926	0.792	0.45
POU3F2	7.68542e-09	0.417298	0.376	0.133
SMOC1	7.86295e-09	0.396696	0.18	0.027
RBMX	8.88234e-09	0.362727	0.927	0.743
AKAP11	1.12256e-08	0.258548	0.331	0.1
DCX	1.16298e-08	0.376774	0.663	0.367
EIF4B	1.33375e-08	0.265878	0.607	0.257
SLC44A2	1.44317e-08	0.296948	0.213	0.043
HMGN2	1.66778e-08	0.358858	0.994	0.947
NFIA	1.75616e-08	0.357673	0.933	0.747
USP9Y	2.14568e-08	0.295119	0.23	0.053
CA9	2.26958e-08	0.517381	0.208	0.043
NR2F1	2.3231e-08	-0.640675	0.629	0.707
BCL11B	3.05348e-08	0.371321	0.416	0.16
LNPK	3.12502e-08	0.369067	0.455	0.187
BTG2	3.55574e-08	0.316132	0.32	0.103
ELAVL2	3.95886e-08	0.353168	0.455	0.19
TIMP2	4.2599e-08	0.323052	0.399	0.15
UBE2QL1	4.68951e-08	0.337375	0.264	0.073
ATP5IF1	4.73504e-08	0.381089	0.691	0.36
STARD4-AS1	4.78255e-08	0.34424	0.388	0.147
MBNL1	4.93154e-08	0.381119	0.309	0.1
IFIT44	4.98951e-08	0.373749	0.464	0.073
IFIT1	4.72504e-08	0.61089	0.691	0.36
NCAPD2	5.96811e-08	0.29428	0.382	0.14
TP53	3.67589e-08	0.453168	0.455	0.19
MT-CO2	5.97554e-08	-0.494337	0.933	0.927
NNAT	6.72909e-08	0.94943	0.157	0.023
EOMES	7.20938e-08	0.614095	0.466	0.227
STK17A	7.82418e-08	0.29158	0.32	0.107
ZWILCH	7.97593e-08	0.29893	0.331	0.11
TAC3	8.78108e-08	0.571969	0.163	0.027
FAM162A	9.04312e-08	0.499492	0.663	0.4
MAP4K4	9.39742e-08	0.285674	0.792	0.437
SSTR2	1.46629e-07	0.400647	0.202	0.047
GPSM2	1.56965e-07	0.287775	0.416	0.167
PGK1	1.74987e-07	0.416159	0.843	0.587
ARL4C	1.78474e-07	0.342072	0.612	0.31
MAPK6	1.93442e-07	0.30368	0.416	0.167
INSM1	2.0834e-07	0.320759	0.461	0.207
NFIB	2.09509e-07	0.29043	0.916	0.713
C11orf54	2.18561e-07	0.322531	0.281	0.087
STIP1	2.30166e-07	0.252199	0.461	0.193
FABP5	2.34304e-07	-0.924245	0.511	0.603
USP18	1.18561e-07	0.422531	0.301	0.087
TMEM158	2.45293e-07	0.321584	0.382	0.15
BNIP3	2.52844e-07	0.435751	0.803	0.57
GPI	2.5688e-07	0.366278	0.635	0.343
PEG10	2.91257e-07	-0.610151	0.843	0.857
ELAVL4	2.97363e-07	0.374798	0.517	0.257
CASP8	2.23284e-07	0.436348	0.803	0.57
ASAP1	3.00362e-07	0.309995	0.444	0.19
TCF4	3.03397e-07	0.314353	0.927	0.777
EGR1	3.07664e-07	0.476248	0.758	0.54
FADS2	3.42165e-07	0.26964	0.376	0.15
ENO2	3.65427e-07	0.316802	0.528	0.257
MALAT1	4.13227e-07	0.39552	0.978	0.977
MAP2	4.31404e-07	0.380994	0.787	0.52
STAT1	3.07326e-07	0.476248	0.758	0.34
CASP7	3.35226e-07	0.316802	0.728	0.257
KMT5A	5.49502e-07	0.289148	0.399	0.163
TNPO2	6.99052e-07	0.251453	0.253	0.077
APPL1	7.14612e-07	0.278986	0.399	0.163
FLNA	7.65915e-07	0.263202	0.404	0.16
RBPJ	7.84307e-07	0.381989	0.899	0.65
DHTKD1	8.08433e-07	0.347189	0.32	0.12
DHX15	8.55457e-07	0.314798	0.528	0.25
NREP	9.59421e-07	0.35698	0.815	0.5
RPS12	9.78492e-07	-0.278614	0.955	0.947
DDX27	1.01837e-06	0.275481	0.303	0.11
CORO1C	1.48045e-06	0.254988	0.489	0.223
CHD3	1.55997e-06	0.302961	0.449	0.21
PFKFB4	1.65173e-06	0.300175	0.202	0.057
SLC1A2	1.70597e-06	0.303689	0.427	0.193
DYNC1I2	1.74716e-06	0.279207	0.831	0.54
EIF4G2	1.78394e-06	0.289717	0.888	0.597
STAT2	3.07664e-07	0.476248	0.758	0.54
DOCK7	1.80904e-06	0.26705	0.421	0.193
COX20	1.91524e-06	0.303405	0.64	0.34
VAMP2	2.23069e-06	0.252301	0.567	0.27
HNRNPUL2	2.61929e-06	0.290032	0.562	0.287
DPM3	2.82445e-06	0.301341	0.264	0.09
TCEAL4	2.98029e-06	0.313824	0.73	0.43
LZTS1	2.99247e-06	0.265146	0.242	0.08
KIF2C	3.08645e-06	0.2646	0.404	0.177
ACBD7	3.18374e-06	0.266743	0.174	0.043
NFIX	3.2521e-06	0.264923	0.685	0.377
ZSCAN16-AS1	3.4089e-06	0.299173	0.455	0.21
PBX1	3.78544e-06	0.256566	0.624	0.353
MT-CO1	4.2302e-06	-0.299388	0.978	0.977
HNRNPL	4.39101e-06	0.266004	0.522	0.263
ARHGAP19	4.60177e-06	0.298764	0.253	0.09
COPA	4.94026e-06	0.276943	0.399	0.183
NAV1	5.59598e-06	0.300968	0.421	0.2
TMEM132B	6.21165e-06	0.259178	0.444	0.207
WSB1	6.32822e-06	0.409533	0.775	0.503
CENPE	7.05925e-06	0.426745	0.449	0.243
MT-CYB	7.23294e-06	-0.423791	0.888	0.903
PRR11	7.28895e-06	0.25057	0.382	0.177
ANKRD28	8.67221e-06	0.265114	0.343	0.147
MSI1	8.74626e-06	0.255481	0.281	0.107
RND3	8.9878e-06	0.345988	0.601	0.33
FOXG1	9.39159e-06	0.253797	0.685	0.39
CASP3	8.67221e-06	0.265114	0.643	0.147
SNAPC3	1.09066e-05	0.280564	0.326	0.14
IGFBP2	1.4729e-05	0.327293	0.916	0.73
PLPPR4	1.5498e-05	0.320921	0.14	0.033
RFC3	1.7601e-05	0.277418	0.556	0.307
EIF3L	2.56559e-05	0.283893	0.607	0.347
BNIP3L	3.17305e-05	0.307016	0.708	0.467
MT-ATP6	4.56841e-05	-0.423024	0.927	0.907
IVNS1ABP	4.84441e-05	0.301059	0.534	0.307
LINC01965	5.38851e-05	0.39907	0.287	0.13
TACC3	5.8104e-05	0.324634	0.517	0.297
GTF2I	5.91623e-05	0.254114	0.854	0.59
MT-CO3	8.09141e-05	-0.358264	0.978	0.94
PIMREG	0.000145963	0.291859	0.393	0.213
NUP214	0.000169284	0.254331	0.219	0.09
PEA15	0.000175055	0.283011	0.483	0.277
NHLH1	0.000175446	0.272097	0.208	0.083
LOX	0.000186951	0.285143	0.157	0.053
HOPX	0.000193087	-0.625564	0.135	0.257
ELAVL3	0.000197151	0.270497	0.697	0.457
MKRN1	0.00020586	0.255443	0.27	0.12
SGO2	0.000207238	0.271465	0.517	0.317
ETV1	0.000243505	0.300338	0.326	0.167
SFRP1	0.000263718	0.339068	0.59	0.373
APOLD1	0.000344749	0.460886	0.343	0.187
VEGFA	0.000445482	0.336751	0.556	0.343
NPM1	0.000505082	-0.290447	0.899	0.843
DLL1	0.000586588	0.266723	0.18	0.073
ID3	0.000670713	-0.575202	0.292	0.41
PTMS	0.000767107	0.26626	0.91	0.783
DLGAP5	0.000853791	0.337908	0.522	0.333
HSP90AB1	0.000880573	-0.293747	0.893	0.847
CD24	0.000910631	0.27465	0.68	0.487
BEX1	0.00111468	0.260203	0.725	0.517
CENPF	0.00144718	0.279767	0.843	0.73
SOX4	0.00175603	0.277437	0.916	0.853
NASP	0.0029482	-0.252765	0.843	0.807
HNRNPH1	0.00329859	0.258029	0.764	0.537
LIX1	0.00366226	-0.314956	0.039	0.113
GSTP1	0.00395899	-0.250713	0.888	0.82
NR2F2	0.00411399	-0.455166	0.09	0.173
MAP2K6	0.00422871	-0.321919	0.045	0.12
SAR1A	0.00442867	0.740123	0.309	0.17
PRDX2	0.00455241	-0.273209	0.809	0.75
NDUFA13	0.0047563	-0.253972	0.753	0.713
NPY	0.00703973	0.271674	0.287	0.173
HMGA2	0.00759797	-0.319089	0.051	0.12
ADGRV1	0.00794164	-0.478917	0.213	0.287
ID4	0.00864716	-0.440676	0.427	0.49
NME2	0.0100895	-0.337728	0.725	0.67
APCDD1	0.0116554	-0.35918	0.067	0.133
FBLN1	0.0144969	-0.475798	0.242	0.3
FST	0.0148128	-0.437109	0.152	0.22
PRELID1	0.0166314	-0.399826	0.348	0.387
COX4I1	0.0188079	-0.26865	0.798	0.753
TOP2A	0.0201815	0.327398	0.803	0.74
DUT	0.0286868	-0.26934	0.596	0.58
PON2	0.0355478	-0.363166	0.258	0.313
PCLAF	0.0420996	-0.29383	0.635	0.62
SREK1IP1	0.0450193	-0.36642	0.354	0.213
UBE2I	0.069636	-0.307082	0.511	0.49
PHGDH	0.0730937	-0.325369	0.517	0.497
CNTNAP2	0.0865566	-0.273002	0.152	0.2
RPS10	0.0984781	-0.265036	0.758	0.623
SNRPF	0.101154	-0.26107	0.719	0.62
ATP5F1D	0.113936	-0.308283	0.455	0.443
SSH2	0.114631	-0.275198	0.079	0.117
RAB3B	0.114631	-0.396777	0.079	0.117
