# Supplementary material for: A Human 3D neural assembloid model for SARS-CoV-2 infection
Source: Res Sq. 2021 Feb 12:rs.3.rs-214352. Preprint. [Version 1] doi: 10.21203/rs.3.rs-214352/v1 (PMC7885926; doi:10.21203/rs.3.rs-214352/v1)
Supplement: Supplement [file 03dfb02d019d2c1d1afd44d3.xlsx]

## Sheet: PCCO V.S CO-MS
Protein ID	Accession	Significance	-10lgP	Intensity-CO_r1	Intensity -CO_r2	Intensity -PCCO_r1	Intensity -PCCO_r2	Ratio-CO_r1	Ratio-CO_r2	Ratio-PCCO_r1	Ratio-PCCO_r2	Intensity-COs	Intensity PCCO	Ratio CO	Ratio PCCO	Avg. Mass
964	P16403|H12_HUMAN	98.83	270.98	7210000	6530000	2730000	2910000	1	0.91	0.38	0.4	6870000	2820000	1	0.41	21365
2177	Q13938|CAYP1_HUMAN	86.7	192.69	9480000	9400000	4040000	4190000	1	0.99	0.43	0.44	9440000	4120000	1	0.44	20967
1977	P08123|CO1A2_HUMAN	79.69	207.39	4290000	4330000	9880000	9170000	1	1.01	2.3	2.14	4310000	9520000	1	2.21	129314
1318	Q9BW30|TPPP3_HUMAN	75.06	263.57	26000000	25400000	11700000	12200000	1	0.98	0.45	0.47	25700000	11900000	1	0.46	18985
3195	Q16650|TBR1_HUMAN	60.98	136.98	781000	838000	1990000	1960000	1	1.07	2.55	2.51	809000	1970000	1	2.44	74053
1579	Q8NCB2|CAMKV_HUMAN	52.06	268.32	6140000	4130000	8660000	10600000	1	0.67	1.41	1.72	5140000	9610000	1	1.87	54354
906	P11217|PYGM_HUMAN	51.64	230.09	2030000	2070000	1080000	1120000	1	1.02	0.53	0.55	2050000	1100000	1	0.54	97092
2578	Q14894|CRYM_HUMAN	50.85	168.2	2850000	2940000	5650000	5430000	1	1.03	1.99	1.91	2890000	5540000	1	1.91	33776
1572	P29762|RABP1_HUMAN	50.76	267.5	40900000	42500000	78800000	76000000	1	1.04	1.93	1.86	41700000	77400000	1	1.85	15566
1169	Q14982|OPCM_HUMAN	39.38	238.49	4370000	4320000	7460000	7360000	1	0.99	1.71	1.69	4340000	7410000	1	1.71	38008
2993	Q99986|VRK1_HUMAN	36.22	169.99	2010000	2030000	3370000	3350000	1	1.01	1.67	1.66	2020000	3360000	1	1.66	45476
2631	O75487|GPC4_HUMAN	30.61	186.28	1090000	1110000	1790000	1710000	1	1.02	1.64	1.57	1100000	1750000	1	1.59	62412
3189	Q9UBX5|FBLN5_HUMAN	30.6	133.57	977000	912000	557000	554000	1	0.93	0.57	0.57	944000	555000	1	0.59	50181
2493	Q14241|ELOA1_HUMAN	29.7	144.49	11000000	10100000	6990000	6430000	1	0.91	0.63	0.58	10600000	6710000	1	0.64	89909
4483	Q5GH72|XKR7_HUMAN	29.67	124.27	735000	721000	442000	428000	1	0.98	0.6	0.58	728000	435000	1	0.6	63826
1818	Q14914|PTGR1_HUMAN	29.56	211.07	15500000	17600000	8660000	12400000	1	1.14	0.56	0.8	16600000	10500000	1	0.64	35870
910	P35555|FBN1_HUMAN	29.52	252.01	5580000	5710000	8890000	8840000	1	1.02	1.59	1.59	5640000	8860000	1	1.57	312237
1096	Q10713|MPPA_HUMAN	28.45	204.53	7560000	7980000	3590000	6390000	1	1.06	0.48	0.85	7770000	4990000	1	0.64	58253
2766	P55058|PLTP_HUMAN	27.1	145.52	5220000	6060000	3730000	3610000	1	1.16	0.71	0.69	5640000	3670000	1	0.65	54739
1321	Q9BWD1|THIC_HUMAN	26.66	266.69	10800000	11000000	16700000	16700000	1	1.02	1.55	1.54	10900000	16700000	1	1.53	41351
1002	P33992|MCM5_HUMAN	26.55	219.29	7350000	7330000	11600000	10900000	1	1	1.57	1.48	7340000	11200000	1	1.53	82286
2226	P29373|RABP2_HUMAN	26.41	180.5	4960000	4660000	7550000	7140000	1	0.94	1.52	1.44	4810000	7340000	1	1.53	15693
2103	Q9Y4E8|UBP15_HUMAN	26.11	194.85	5260000	5030000	8100000	7560000	1	0.96	1.54	1.44	5150000	7830000	1	1.52	112419
675	P25205|MCM3_HUMAN	25.96	243.47	8880000	8950000	13700000	13400000	1	1.01	1.55	1.51	8920000	13600000	1	1.52	90981
70	P06396|GELS_HUMAN	25.42	383.36	158000000	160000000	106000000	105000000	1	1.01	0.67	0.66	159000000	105000000	1	0.66	85697
124	P48681|NEST_HUMAN	25.35	466.92	169000000	170000000	110000000	114000000	1	1	0.65	0.67	170000000	112000000	1	0.66	177438
1754	O00423|EMAL1_HUMAN	24.93	184.43	4280000	4400000	6740000	6330000	1	1.03	1.57	1.48	4340000	6530000	1	1.5	89861
343	Q9NZI8|IF2B1_HUMAN	24.79	286.02	17500000	18000000	26800000	26600000	1	1.03	1.53	1.52	17800000	26700000	1	1.5	63481
2110	Q15005|SPCS2_HUMAN	24.77	167.14	10400000	12300000	5280000	9800000	1	1.18	0.51	0.94	11300000	7540000	1	0.67	25003
1530	O75936|BODG_HUMAN	24.06	213.37	11700000	11600000	7650000	7950000	1	0.99	0.65	0.68	11600000	7800000	1	0.67	44715
3377	Q7Z3B1|NEGR1_HUMAN	23.52	175.27	1860000	1780000	2720000	2680000	1	0.96	1.46	1.44	1820000	2700000	1	1.48	38719
1600	Q04695|K1C17_HUMAN	23.19	174.69	876000	942000	1460000	1470000	1	1.08	1.67	1.67	909000	1460000	1	1.61	48106
451	P10909|CLUS_HUMAN	23	342.57	120000000	120000000	80200000	82200000	1	1	0.67	0.69	120000000	81200000	1	0.68	52495
2452	P35052|GPC1_HUMAN	22.91	127.66	2360000	2420000	4210000	4070000	1	1.03	1.78	1.73	2390000	4140000	1	1.73	61680
781	O94760|DDAH1_HUMAN	22.33	274.34	36900000	36100000	24600000	25100000	1	0.98	0.67	0.68	36500000	24900000	1	0.68	31122
1355	P42785|PCP_HUMAN	21.61	207.3	17800000	17400000	12000000	12200000	1	0.97	0.67	0.68	17600000	12100000	1	0.69	55800
2651	P78540|ARGI2_HUMAN	21.22	174.43	1110000	1140000	1650000	1600000	1	1.04	1.5	1.45	1120000	1630000	1	1.45	38578
1931	Q15768|EFNB3_HUMAN	20.92	191.75	7680000	7810000	5160000	5570000	1	1.02	0.67	0.72	7750000	5370000	1	0.69	35835
3549	P00167|CYB5_HUMAN	20.9	131.04	4600000	4850000	3190000	3360000	1	1.06	0.69	0.73	4730000	3270000	1	0.69	15330
15	O43602|DCX_HUMAN	20.56	346.89	65900000	66000000	97400000	92300000	1	1	1.48	1.4	66000000	94800000	1	1.44	40574
2049	P14543|NID1_HUMAN	20.52	177.78	4260000	4330000	3030000	2950000	1	1.02	0.71	0.69	4290000	2990000	1	0.7	136377
1494	Q13642|FHL1_HUMAN	20.3	305.1	22200000	23500000	15900000	16000000	1	1.06	0.71	0.72	22900000	16000000	1	0.7	36263
849	O75914|PAK3_HUMAN	20.18	257.78	1950000	1960000	2810000	2780000	1	1.01	1.45	1.43	1950000	2790000	1	1.43	62310
829	P13929|ENOB_HUMAN	19.75	306.49	34700000	33400000	24200000	23600000	1	0.96	0.7	0.68	34000000	23900000	1	0.7	46987
315	P11047|LAMC1_HUMAN	19.64	321.8	38200000	38800000	26400000	27700000	1	1.02	0.69	0.73	38500000	27000000	1	0.7	177602
508	Q96GW7|PGCB_HUMAN	19.64	287.21	17000000	16400000	11900000	11600000	1	0.97	0.7	0.68	16700000	11700000	1	0.7	99118
652	Q14566|MCM6_HUMAN	19.45	261.76	10100000	9930000	14300000	14200000	1	0.98	1.41	1.4	10000000	14200000	1	1.42	92889
1453	P35237|SPB6_HUMAN	19.31	225.16	9550000	9470000	6720000	6690000	1	0.99	0.7	0.7	9510000	6700000	1	0.71	42622
1807	P00918|CAH2_HUMAN	19.09	248.77	21600000	21300000	15600000	14700000	1	0.98	0.72	0.68	21400000	15200000	1	0.71	29246
309	P07942|LAMB1_HUMAN	18.98	336.58	65100000	63800000	45400000	45800000	1	0.98	0.7	0.7	64400000	45600000	1	0.71	198037
9591	P52926|HMGA2_HUMAN	18.74	126.98	504000	468000	1200000	1130000	1	0.93	2.38	2.23	486000	1160000	1	2.39	11832
692	P33993|MCM7_HUMAN	18.71	231.34	6030000	6420000	8630000	8900000	1	1.06	1.43	1.48	6220000	8770000	1	1.41	81308
250	Q9Y617|SERC_HUMAN	18.65	339.71	69400000	68500000	48300000	49700000	1	0.99	0.7	0.72	69000000	49000000	1	0.71	40423
363	Q01814|AT2B2_HUMAN	18.36	300.68	11800000	12300000	6920000	10300000	1	1.04	0.58	0.87	12100000	8590000	1	0.71	136876
2835	O96028|NSD2_HUMAN	18.2	163.92	981000	1020000	1340000	1650000	1	1.04	1.36	1.68	1000000	1490000	1	1.49	152258
3465	P08962|CD63_HUMAN	18.18	140.01	4130000	3930000	2960000	2800000	1	0.95	0.72	0.68	4030000	2880000	1	0.71	25637
592	Q9UNF1|MAGD2_HUMAN	18.17	280.38	9900000	14400000	8750000	8570000	1	1.45	0.88	0.87	12100000	8660000	1	0.71	64954
6	P14136|GFAP_HUMAN	18.06	468.07	705000000	692000000	500000000	500000000	1	0.98	0.71	0.71	699000000	500000000	1	0.72	49880
690	Q9UPZ6|THS7A_HUMAN	17.91	229.68	4330000	4480000	6170000	6120000	1	1.04	1.43	1.41	4400000	6150000	1	1.4	185363
1714	Q92922|SMRC1_HUMAN	17.91	215.55	2770000	2870000	4010000	3870000	1	1.03	1.44	1.4	2820000	3940000	1	1.4	122867
1569	Q96P47|AGAP3_HUMAN	17.9	204.5	2860000	2770000	4020000	3830000	1	0.97	1.41	1.34	2810000	3920000	1	1.4	95044
3122	P04004|VTNC_HUMAN	17.86	171.27	39800000	38100000	28700000	27200000	1	0.96	0.72	0.68	39000000	27900000	1	0.72	54306
365	Q8TCU6|PREX1_HUMAN	17.71	294.43	23300000	23000000	16600000	16600000	1	0.99	0.71	0.71	23100000	16600000	1	0.72	186202
119	Q14315|FLNC_HUMAN	17.63	472.04	170000000	167000000	122000000	120000000	1	0.98	0.72	0.71	168000000	121000000	1	0.72	291020
221	Q09666|AHNK_HUMAN	17.41	470.44	170000000	167000000	120000000	123000000	1	0.98	0.71	0.72	168000000	121000000	1	0.72	629114
1465	O60701|UGDH_HUMAN	17.32	213.63	5770000	5710000	8040000	7880000	1	0.99	1.39	1.37	5740000	7960000	1	1.39	55024
1782	Q93045|STMN2_HUMAN	17.16	206.47	5360000	5710000	6770000	8540000	1	1.07	1.26	1.59	5530000	7650000	1	1.38	20828
2146	Q01469|FABP5_HUMAN	17.05	334.66	39400000	37500000	51400000	54900000	1	0.95	1.3	1.39	38500000	53100000	1	1.38	15164
2089	O00339|MATN2_HUMAN	16.86	174.27	3090000	3260000	2230000	2270000	1	1.05	0.72	0.73	3170000	2250000	1	0.71	106837
794	Q9UEY8|ADDG_HUMAN	16.73	261.78	8530000	8600000	6230000	6220000	1	1.01	0.73	0.73	8570000	6220000	1	0.73	79155
3978	Q9HAT2|SIAE_HUMAN	16.56	116.92	3950000	3880000	2740000	2690000	1	0.98	0.69	0.68	3920000	2720000	1	0.69	58315
4168	O00746|NDKM_HUMAN	16.53	114.25	2300000	2330000	3720000	3560000	1	1.01	1.62	1.55	2310000	3640000	1	1.57	20659
199	P50993|AT1A2_HUMAN	16.43	364.31	34500000	35000000	25400000	25300000	1	1.02	0.74	0.73	34700000	25300000	1	0.73	112265
2772	Q15287|RNPS1_HUMAN	16.4	186.05	2040000	2070000	2860000	2770000	1	1.01	1.4	1.36	2060000	2820000	1	1.37	34208
2339	Q15274|NADC_HUMAN	16.33	165.88	10900000	11000000	7290000	8110000	1	1.01	0.67	0.74	11000000	7700000	1	0.7	30846
3396	O76041|NEBL_HUMAN	16.18	130.16	1470000	1420000	1030000	894000	1	0.97	0.7	0.61	1450000	962000	1	0.67	116453
229	Q02952|AKA12_HUMAN	16.09	320.69	25300000	25800000	34800000	35000000	1	1.02	1.38	1.38	25500000	34900000	1	1.37	191480
53	Q15149|PLEC_HUMAN	16.08	594.34	491000000	492000000	356000000	364000000	1	1	0.72	0.74	492000000	360000000	1	0.73	531796
1235	Q9UHL4|DPP2_HUMAN	16.08	243.19	6130000	6200000	4400000	4630000	1	1.01	0.72	0.76	6160000	4510000	1	0.73	54342
2966	Q9H4L7|SMRCD_HUMAN	16.05	171.68	1450000	1460000	2000000	1980000	1	1.01	1.38	1.36	1460000	1990000	1	1.37	117402
938	P52701|MSH6_HUMAN	16.03	214.68	7020000	7200000	9900000	9520000	1	1.03	1.41	1.35	7110000	9710000	1	1.36	152785
1098	P12004|PCNA_HUMAN	15.96	254.29	15500000	15600000	21100000	21300000	1	1.01	1.37	1.38	15600000	21200000	1	1.36	28769
1638	Q9UBG0|MRC2_HUMAN	15.92	209.94	3730000	3780000	5190000	5050000	1	1.01	1.39	1.35	3760000	5120000	1	1.36	166674
3058	P62847|RS24_HUMAN	15.76	197.62	11700000	11400000	15900000	15500000	1	0.97	1.36	1.32	11500000	15700000	1	1.36	15423
575	Q92743|HTRA1_HUMAN	15.7	291.49	22900000	22100000	16800000	16300000	1	0.97	0.74	0.71	22500000	16600000	1	0.74	51287
691	Q9P0M6|H2AW_HUMAN	15.62	255.91	32400000	31500000	44000000	42800000	1	0.97	1.36	1.32	32000000	43400000	1	1.36	40058
3258	Q9ULS5|TMCC3_HUMAN	15.6	131.74	2050000	2080000	1410000	1490000	1	1.01	0.69	0.73	2060000	1450000	1	0.7	53785
379	P10155|RO60_HUMAN	15.53	315.65	27400000	29500000	18200000	23700000	1	1.08	0.67	0.86	28400000	21000000	1	0.74	60671
3391	Q9UK76|HN1_HUMAN	15.53	201.66	7170000	7660000	10100000	9970000	1	1.07	1.41	1.39	7410000	10100000	1	1.36	16015
1164	P02751|FINC_HUMAN	15.45	201.48	5610000	3320000	4420000	7820000	1	0.59	0.79	1.39	4470000	6120000	1	1.37	262622
245	Q15365|PCBP1_HUMAN	15.33	322.29	21300000	23000000	29000000	30900000	1	1.08	1.36	1.45	22200000	30000000	1	1.35	37498
2453	O43854|EDIL3_HUMAN	15.28	133.47	7990000	8060000	11900000	11400000	1	1.01	1.48	1.43	8030000	11600000	1	1.45	53765
4021	Q9BQ61|CS043_HUMAN	15.25	159.32	1590000	1470000	2130000	2020000	1	0.92	1.33	1.27	1530000	2070000	1	1.35	18419
2193	P15559|NQO1_HUMAN	15.25	153.74	12500000	11500000	8640000	8490000	1	0.93	0.69	0.68	12000000	8570000	1	0.71	30868
3460	Q14739|LBR_HUMAN	15.21	139.31	3310000	3350000	4670000	4360000	1	1.01	1.41	1.32	3330000	4520000	1	1.36	70703
75	P08133|ANXA6_HUMAN	15.11	384.9	127000000	126000000	93100000	94900000	1	0.99	0.73	0.75	127000000	94000000	1	0.74	75873
2126	Q14108|SCRB2_HUMAN	15.08	197.56	19700000	20300000	14700000	15000000	1	1.03	0.75	0.76	20000000	14800000	1	0.74	54290
3627	Q15121|PEA15_HUMAN	15	139.82	4260000	4180000	3190000	3040000	1	0.98	0.75	0.71	4220000	3120000	1	0.74	15040
1779	Q15637|SF01_HUMAN	14.9	197.29	5470000	5430000	7390000	7270000	1	0.99	1.35	1.33	5450000	7330000	1	1.35	68330
3534	P37268|FDFT_HUMAN	14.64	144.55	840000	842000	1160000	1090000	1	1	1.39	1.3	841000	1130000	1	1.34	48115
244	P08758|ANXA5_HUMAN	14.63	358.36	66800000	67400000	49400000	50700000	1	1.01	0.74	0.76	67100000	50000000	1	0.75	35937
2203	Q96A23|CPNE4_HUMAN	14.49	170.9	4690000	4720000	3480000	3560000	1	1.01	0.74	0.76	4710000	3520000	1	0.75	62395
2868	O75503|CLN5_HUMAN	14.41	204.43	8980000	8770000	6640000	6640000	1	0.98	0.74	0.74	8880000	6640000	1	0.75	41497
2633	Q96K17|BT3L4_HUMAN	14.39	185.9	9900000	9700000	13400000	12800000	1	0.98	1.35	1.3	9800000	13100000	1	1.34	17271
4127	Q92765|SFRP3_HUMAN	14.06	91.38	2890000	2920000	1850000	1910000	1	1.01	0.64	0.66	2900000	1880000	1	0.65	36254
2900	Q8IUC4|RHPN2_HUMAN	14.05	167.36	2740000	2700000	2040000	2050000	1	0.99	0.74	0.75	2720000	2050000	1	0.75	76993
4185	Q9ULX7|CAH14_HUMAN	14	138.96	3330000	3350000	2460000	2570000	1	1.01	0.74	0.77	3340000	2510000	1	0.75	37668
1109	Q8NBS9|TXND5_HUMAN	13.95	276.44	16400000	16500000	22000000	21700000	1	1	1.34	1.32	16400000	21800000	1	1.33	47629
3312	Q06136|KDSR_HUMAN	13.85	134.8	3800000	3820000	2820000	2930000	1	1	0.74	0.77	3810000	2870000	1	0.75	36187
1019	A0MZ66|SHOT1_HUMAN	13.78	237.23	7460000	7710000	10100000	10100000	1	1.03	1.35	1.35	7580000	10100000	1	1.33	71640
1079	O60488|ACSL4_HUMAN	13.76	235.37	5880000	5970000	8020000	7680000	1	1.02	1.36	1.31	5920000	7850000	1	1.33	79188
516	P41219|PERI_HUMAN	13.65	284.9	6560000	6700000	8820000	8730000	1	1.02	1.34	1.33	6630000	8770000	1	1.32	53651
1229	Q9UDY2|ZO2_HUMAN	13.64	194.13	4880000	4950000	3710000	3720000	1	1.01	0.76	0.76	4920000	3720000	1	0.76	133958
3	Q16352|AINX_HUMAN	13.61	426.23	166000000	167000000	225000000	216000000	1	1	1.36	1.3	167000000	221000000	1	1.32	55391
948	P49736|MCM2_HUMAN	13.53	216.51	3990000	4060000	5340000	5300000	1	1.02	1.34	1.33	4030000	5320000	1	1.32	101896
1	P08670|VIME_HUMAN	13.49	498.94	1270000000	1240000000	942000000	960000000	1	0.98	0.74	0.76	1260000000	951000000	1	0.76	53652
3718	Q15223|NECT1_HUMAN	13.41	163.94	2250000	2230000	2930000	2980000	1	0.99	1.3	1.32	2240000	2960000	1	1.32	57158
550	P33991|MCM4_HUMAN	13.4	261.54	11500000	11800000	15000000	15800000	1	1.02	1.3	1.37	11700000	15400000	1	1.32	96558
1840	O15347|HMGB3_HUMAN	13.4	244.86	20800000	20300000	27500000	26800000	1	0.97	1.32	1.28	20600000	27100000	1	1.32	22980
3517	O00625|PIR_HUMAN	13.3	141.34	4630000	4570000	3530000	3460000	1	0.99	0.76	0.75	4600000	3490000	1	0.76	32113
3043	Q9H4G4|GAPR1_HUMAN	13.26	226.19	7010000	6960000	5260000	5350000	1	0.99	0.75	0.76	6980000	5300000	1	0.76	17218
1940	Q01105|SET_HUMAN	13.22	226.61	36500000	38300000	50200000	48200000	1	1.05	1.38	1.32	37400000	49200000	1	1.32	33489
1467	P39687|AN32A_HUMAN	13.1	248.09	11100000	11100000	15000000	14100000	1	1	1.35	1.27	11100000	14600000	1	1.31	28585
439	Q9Y6M1|IF2B2_HUMAN	13.09	256.61	8870000	8970000	11700000	11700000	1	1.01	1.32	1.32	8920000	11700000	1	1.31	66121
1119	P23381|SYWC_HUMAN	13.06	255.27	16300000	16300000	21600000	21200000	1	1	1.33	1.31	16300000	21400000	1	1.31	53165
1937	P45973|CBX5_HUMAN	13.02	192.97	13000000	13100000	17400000	16900000	1	1.01	1.34	1.3	13100000	17200000	1	1.31	22225
2406	P24941|CDK2_HUMAN	13.01	176.17	5680000	5490000	7550000	7110000	1	0.97	1.33	1.25	5590000	7330000	1	1.31	33930
2999	P17900|SAP3_HUMAN	12.89	232.56	12900000	12900000	9790000	9940000	1	1	0.76	0.77	12900000	9870000	1	0.76	20838
2151	Q9H4F8|SMOC1_HUMAN	12.89	140.8	1800000	1840000	1240000	1260000	1	1.02	0.69	0.7	1820000	1250000	1	0.69	48163
2989	P00747|PLMN_HUMAN	12.79	191.47	12300000	12600000	9460000	9560000	1	1.02	0.77	0.78	12400000	9510000	1	0.76	90569
3719	Q9NP66|HM20A_HUMAN	12.72	133.53	1740000	1790000	2380000	2250000	1	1.03	1.36	1.29	1770000	2310000	1	1.31	40144
3802	P55107|GDF10_HUMAN	12.72	105.41	2900000	2870000	2060000	2020000	1	0.99	0.71	0.69	2880000	2040000	1	0.71	53122
746	P00568|KAD1_HUMAN	12.62	299.79	53300000	52700000	41100000	40100000	1	0.99	0.77	0.75	53000000	40600000	1	0.77	21635
2520	P09455|RET1_HUMAN	12.61	157.19	8920000	8730000	6730000	6800000	1	0.98	0.75	0.76	8830000	6760000	1	0.77	15850
1519	P30520|PURA2_HUMAN	12.6	215.12	4250000	4270000	5640000	5480000	1	1.01	1.33	1.29	4260000	5560000	1	1.3	50097
1811	P09211|GSTP1_HUMAN	12.54	280.14	28400000	25600000	37500000	32900000	1	0.9	1.32	1.16	27000000	35200000	1	1.3	23356
2768	P02452|CO1A1_HUMAN	12.54	133.46	1760000	1800000	2440000	2450000	1	1.03	1.39	1.39	1780000	2440000	1	1.37	138942
1944	P05783|K1C18_HUMAN	12.46	154.58	1930000	1890000	2610000	2470000	1	0.98	1.35	1.28	1910000	2540000	1	1.33	48058
1242	Q9BUT1|BDH2_HUMAN	12.45	220.99	16000000	15700000	12300000	12000000	1	0.98	0.77	0.75	15800000	12100000	1	0.77	26724
505	Q13554|KCC2B_HUMAN	12.43	282.25	22900000	21800000	29200000	29000000	1	0.95	1.27	1.27	22400000	29100000	1	1.3	72678
2862	Q9UBM7|DHCR7_HUMAN	12.41	146.43	4190000	4140000	5560000	5280000	1	0.99	1.33	1.26	4160000	5420000	1	1.3	54489
3660	Q15427|SF3B4_HUMAN	12.4	176.58	5060000	5240000	6730000	6670000	1	1.04	1.33	1.32	5150000	6700000	1	1.3	44386
2232	Q15738|NSDHL_HUMAN	12.37	213.98	3600000	3700000	4810000	4670000	1	1.03	1.34	1.3	3650000	4740000	1	1.3	41900
779	Q13510|ASAH1_HUMAN	12.32	282.5	35800000	36300000	27800000	27700000	1	1.01	0.77	0.77	36100000	27700000	1	0.77	44660
2149	Q9UN36|NDRG2_HUMAN	12.32	217.49	4870000	4990000	3890000	3690000	1	1.02	0.8	0.76	4930000	3790000	1	0.77	40798
2052	P43146|DCC_HUMAN	12.27	181.34	2930000	3090000	3970000	3850000	1	1.05	1.35	1.31	3010000	3910000	1	1.3	158456
1348	Q99541|PLIN2_HUMAN	12.24	212.86	5250000	5370000	6940000	6840000	1	1.02	1.32	1.3	5310000	6890000	1	1.3	48075
3408	Q08495|DEMA_HUMAN	12.22	118.41	838000	890000	1340000	1350000	1	1.06	1.6	1.61	864000	1350000	1	1.56	45514
3539	Q9Y5J1|UTP18_HUMAN	12.19	140.95	1130000	1130000	1570000	1540000	1	1	1.39	1.37	1130000	1550000	1	1.38	62004
2054	P04179|SODM_HUMAN	12.16	234.06	9380000	9410000	12300000	12100000	1	1	1.31	1.29	9400000	12200000	1	1.3	24722
31	Q9BVA1|TBB2B_HUMAN	12.12	512.72	91900000	88500000	116000000	118000000	1	0.96	1.26	1.28	90200000	117000000	1	1.3	49953
1489	Q14644|RASA3_HUMAN	12.06	202.91	4090000	3960000	3080000	3130000	1	0.97	0.75	0.77	4020000	3110000	1	0.77	95699
1285	P16402|H13_HUMAN	12.05	263.85	3350000	3310000	1990000	1980000	1	0.99	0.59	0.59	3330000	1990000	1	0.6	22350
3484	Q53FP2|TMM35_HUMAN	12.01	117.88	4460000	4130000	5540000	6070000	1	0.93	1.24	1.36	4300000	5800000	1	1.35	18440
1588	Q09028|RBBP4_HUMAN	11.97	230.04	3120000	3100000	3660000	4380000	1	0.99	1.17	1.4	3110000	4020000	1	1.29	47656
1712	Q9Y2T2|AP3M1_HUMAN	11.97	199.75	1780000	1770000	2310000	2280000	1	1	1.3	1.28	1770000	2290000	1	1.29	46939
1849	P14324|FPPS_HUMAN	11.88	260.05	8300000	8320000	10900000	10600000	1	1	1.31	1.27	8310000	10700000	1	1.29	48276
3487	A6NDU8|CE051_HUMAN	11.81	151.23	2410000	2380000	1840000	1880000	1	0.98	0.76	0.78	2400000	1860000	1	0.77	33620
3675	P04818|TYSY_HUMAN	11.8	157.96	946000	935000	1240000	1190000	1	0.99	1.31	1.25	941000	1210000	1	1.29	35716
354	O00425|IF2B3_HUMAN	11.77	256.36	10200000	10100000	13300000	12900000	1	0.98	1.3	1.26	10100000	13100000	1	1.29	63705
6972	P60468|SC61B_HUMAN	11.75	100.99	598000	543000	873000	762000	1	0.91	1.46	1.27	571000	817000	1	1.43	9974
1338	O95197|RTN3_HUMAN	11.71	208.36	13100000	13500000	17700000	16500000	1	1.04	1.36	1.27	13300000	17100000	1	1.29	112611
758	P30041|PRDX6_HUMAN	11.58	308.11	34400000	35300000	27500000	26600000	1	1.03	0.8	0.78	34800000	27100000	1	0.78	25035
4105	Q14244|MAP7_HUMAN	11.4	112.18	1040000	1030000	783000	751000	1	0.99	0.75	0.72	1040000	767000	1	0.74	84052
1671	Q92558|WASF1_HUMAN	11.37	185.12	5100000	5120000	6670000	6440000	1	1	1.31	1.26	5110000	6550000	1	1.28	61652
137	O15061|SYNEM_HUMAN	11.33	376.77	52400000	52300000	40900000	40800000	1	1	0.78	0.78	52300000	40800000	1	0.78	172767
4391	Q9P0I2|EMC3_HUMAN	11.32	87.7	4390000	4140000	2280000	3520000	1	0.94	0.52	0.8	4260000	2900000	1	0.68	29952
1698	Q92820|GGH_HUMAN	11.25	204.89	36900000	36500000	29100000	28100000	1	0.99	0.79	0.76	36700000	28600000	1	0.78	35964
1246	P26378|ELAV4_HUMAN	11.2	257.71	658000	684000	871000	845000	1	1.04	1.32	1.28	671000	858000	1	1.28	41770
2340	Q9BT09|CNPY3_HUMAN	11.19	179.57	10600000	11200000	6890000	10200000	1	1.06	0.65	0.96	10900000	8550000	1	0.78	30748
219	P53396|ACLY_HUMAN	11.09	330.23	41000000	41000000	53100000	51600000	1	1	1.3	1.26	41000000	52400000	1	1.28	120839
1892	Q8TC12|RDH11_HUMAN	11.08	216.08	13100000	13700000	9640000	11400000	1	1.04	0.73	0.86	13400000	10500000	1	0.78	35386
1571	P52292|IMA1_HUMAN	11.06	203.46	5820000	5570000	7560000	6980000	1	0.96	1.3	1.2	5690000	7270000	1	1.28	57862
2728	P62750|RL23A_HUMAN	11.03	144.66	5370000	5490000	7020000	6840000	1	1.02	1.31	1.27	5430000	6930000	1	1.28	17695
2247	P21246|PTN_HUMAN	11.01	158.92	8880000	8750000	6870000	6950000	1	0.99	0.77	0.78	8810000	6910000	1	0.78	18942
2064	Q15363|TMED2_HUMAN	10.94	164.67	7800000	7990000	6190000	6210000	1	1.02	0.79	0.8	7900000	6200000	1	0.78	22761
1829	P02511|CRYAB_HUMAN	10.86	270.51	45900000	46500000	36400000	36200000	1	1.01	0.79	0.79	46200000	36300000	1	0.79	20159
3143	P31949|S10AB_HUMAN	10.84	120.06	1820000	1800000	2590000	2460000	1	0.99	1.42	1.35	1810000	2530000	1	1.39	11740
1047	Q13148|TADBP_HUMAN	10.82	304.63	15700000	15400000	20300000	19300000	1	0.98	1.29	1.23	15500000	19800000	1	1.27	44740
1681	P52788|SPSY_HUMAN	10.78	211.29	9950000	10200000	12900000	12700000	1	1.02	1.29	1.28	10100000	12800000	1	1.27	41268
2033	P31483|TIA1_HUMAN	10.72	182.58	709000	683000	783000	984000	1	0.96	1.11	1.39	696000	884000	1	1.27	42963
389	P43304|GPDM_HUMAN	10.69	285.13	11800000	11200000	14900000	14200000	1	0.96	1.27	1.21	11500000	14600000	1	1.27	80853
3434	P61916|NPC2_HUMAN	10.65	238.95	18100000	17800000	14300000	14100000	1	0.98	0.79	0.78	18000000	14200000	1	0.79	16570
17	P26038|MOES_HUMAN	10.64	373.88	121000000	120000000	94300000	95500000	1	0.99	0.78	0.79	120000000	94900000	1	0.79	67820
1546	Q9UJZ1|STML2_HUMAN	10.64	228.03	8120000	7910000	6320000	6320000	1	0.97	0.78	0.78	8020000	6320000	1	0.79	38534
1585	O95347|SMC2_HUMAN	10.64	172.6	5130000	5170000	6740000	6700000	1	1.01	1.31	1.31	5150000	6720000	1	1.3	135656
1458	P26358|DNMT1_HUMAN	10.61	245.14	4040000	4210000	5320000	5130000	1	1.04	1.32	1.27	4120000	5230000	1	1.27	183164
3643	O43692|PI15_HUMAN	10.55	202.3	4290000	4290000	3350000	3420000	1	1	0.78	0.8	4290000	3390000	1	0.79	29065
355	P06737|PYGL_HUMAN	10.53	279.1	24700000	24800000	19200000	19800000	1	1	0.78	0.8	24700000	19500000	1	0.79	97149
92	P02545|LMNA_HUMAN	10.5	344.96	76600000	75700000	59900000	60400000	1	0.99	0.78	0.79	76200000	60200000	1	0.79	74140
587	O95202|LETM1_HUMAN	10.49	270.85	14400000	14500000	18500000	18100000	1	1	1.28	1.25	14400000	18300000	1	1.27	83354
693	Q9P258|RCC2_HUMAN	10.49	243.23	18400000	18800000	24100000	23100000	1	1.02	1.31	1.25	18600000	23600000	1	1.27	56085
1720	Q13185|CBX3_HUMAN	10.42	231.88	5910000	6000000	7570000	7480000	1	1.01	1.28	1.27	5950000	7530000	1	1.26	20811
2877	P05362|ICAM1_HUMAN	10.4	139.21	506000	534000	708000	686000	1	1.05	1.4	1.35	520000	697000	1	1.34	57825
2503	P20810|ICAL_HUMAN	10.37	165.67	2100000	2130000	1600000	1740000	1	1.01	0.76	0.83	2110000	1670000	1	0.79	76573
1252	Q9H3Q1|BORG4_HUMAN	10.33	259.38	6260000	6490000	5020000	5080000	1	1.04	0.8	0.81	6370000	5050000	1	0.79	37980
2702	P46976|GLYG_HUMAN	10.3	183.75	20500000	20400000	16600000	15800000	1	0.99	0.81	0.77	20500000	16200000	1	0.79	39384
1158	P21266|GSTM3_HUMAN	10.29	269.75	19400000	19400000	14800000	15900000	1	1	0.77	0.82	19400000	15400000	1	0.79	26560
3150	Q96FV2|SCRN2_HUMAN	10.23	138.36	3370000	3430000	2690000	2700000	1	1.02	0.8	0.8	3400000	2700000	1	0.79	46597
4088	Q99985|SEM3C_HUMAN	10.22	130.1	498000	512000	405000	397000	1	1.03	0.81	0.8	505000	401000	1	0.79	85207
2958	Q9Y6M7|S4A7_HUMAN	10.13	156.57	2850000	2720000	3920000	3260000	1	0.96	1.37	1.14	2790000	3590000	1	1.29	136044
385	Q9Y5B9|SP16H_HUMAN	10.12	311.96	17700000	18600000	22600000	23100000	1	1.05	1.27	1.3	18200000	22900000	1	1.26	119914
1888	Q14671|PUM1_HUMAN	10.09	192.36	1860000	1910000	2420000	2320000	1	1.03	1.3	1.25	1880000	2370000	1	1.26	126473
162	P11137|MTAP2_HUMAN	10.05	385.57	101000000	99900000	127000000	127000000	1	0.99	1.25	1.25	101000000	127000000	1	1.26	199525
1124	Q9HAV4|XPO5_HUMAN	10.05	254.42	6090000	6220000	7790000	7690000	1	1.02	1.28	1.26	6150000	7740000	1	1.26	136311
2495	Q9UKA9|PTBP2_HUMAN	10.04	153.75	4370000	4290000	5690000	5190000	1	0.98	1.3	1.19	4330000	5440000	1	1.26	57491
731	Q13428|TCOF_HUMAN	10.03	243.06	5210000	5230000	6700000	6420000	1	1	1.29	1.23	5220000	6560000	1	1.26	152105
4003	Q99805|TM9S2_HUMAN	10.03	134.55	6020000	5890000	7530000	7440000	1	0.98	1.25	1.24	5960000	7490000	1	1.26	75776
1764	P78352|DLG4_HUMAN	10.02	221.02	5120000	5180000	6390000	6540000	1	1.01	1.25	1.28	5150000	6470000	1	1.26	80495
2377	P54764|EPHA4_HUMAN	9.99	175.64	646000	688000	880000	887000	1	1.07	1.36	1.37	667000	884000	1	1.32	109860
532	O43491|E41L2_HUMAN	9.97	266.71	12100000	12000000	9240000	9980000	1	0.99	0.76	0.82	12100000	9610000	1	0.8	112588
3290	P00374|DYR_HUMAN	9.93	147.45	1290000	1410000	1660000	1730000	1	1.09	1.29	1.33	1350000	1690000	1	1.25	21453
2294	P49959|MRE11_HUMAN	9.91	182.23	3650000	3680000	4680000	4520000	1	1.01	1.28	1.24	3670000	4600000	1	1.25	80593
1399	P22087|FBRL_HUMAN	9.87	242.6	11600000	11700000	14700000	14500000	1	1.01	1.27	1.25	11600000	14600000	1	1.25	33784
3710	Q8TE57|ATS16_HUMAN	9.82	143.25	1680000	1630000	1280000	1240000	1	0.97	0.76	0.74	1650000	1260000	1	0.76	136203
844	P07910|HNRPC_HUMAN	9.81	277.09	24000000	23900000	30600000	29300000	1	1	1.28	1.22	23900000	30000000	1	1.25	33670
4667	Q7Z3D6|CN159_HUMAN	9.81	107.86	373000	407000	938000	847000	1	1.09	2.52	2.27	390000	893000	1	2.29	66437
4134	Q9NVS9|PNPO_HUMAN	9.79	169.3	2780000	2700000	2200000	2170000	1	0.97	0.79	0.78	2740000	2190000	1	0.8	29988
285	Q96AE4|FUBP1_HUMAN	9.74	307.79	25300000	25300000	31600000	31700000	1	1	1.25	1.25	25300000	31700000	1	1.25	67560
1812	O60486|PLXC1_HUMAN	9.69	184.64	4180000	4110000	3290000	3330000	1	0.98	0.79	0.8	4140000	3310000	1	0.8	175741
1351	P43246|MSH2_HUMAN	9.67	202.51	3660000	3790000	4700000	4610000	1	1.04	1.29	1.26	3730000	4660000	1	1.25	104743
3308	Q15428|SF3A2_HUMAN	9.65	153.08	6690000	6690000	8630000	8390000	1	1	1.29	1.25	6690000	8510000	1	1.27	49256
3395	Q96HY6|DDRGK_HUMAN	9.65	147.39	1670000	1660000	2130000	2100000	1	0.99	1.28	1.26	1660000	2110000	1	1.27	35611
2292	Q9UN86|G3BP2_HUMAN	9.6	258.59	10100000	9930000	12600000	12400000	1	0.99	1.25	1.23	10000000	12500000	1	1.25	54121
1644	P07602|SAP_HUMAN	9.6	181.97	11100000	10800000	8680000	8800000	1	0.98	0.79	0.8	10900000	8740000	1	0.8	58113
2867	Q15124|PGM5_HUMAN	9.59	133.58	3780000	3770000	2900000	2740000	1	1	0.77	0.73	3780000	2820000	1	0.75	62225
998	Q9Y383|LC7L2_HUMAN	9.54	286.38	6560000	6520000	8140000	8180000	1	0.99	1.24	1.25	6540000	8160000	1	1.25	46514
2985	Q96MU7|YTDC1_HUMAN	9.52	161.22	2190000	2170000	2760000	2680000	1	0.99	1.26	1.22	2180000	2720000	1	1.25	84700
2435	Q9UM22|EPDR1_HUMAN	9.5	175.04	11400000	11100000	8990000	9070000	1	0.98	0.79	0.8	11300000	9030000	1	0.8	25437
798	O95817|BAG3_HUMAN	9.47	262.25	3600000	3870000	2890000	3100000	1	1.07	0.8	0.86	3740000	3000000	1	0.8	61595
3812	Q9UPN9|TRI33_HUMAN	9.37	128.43	1440000	1430000	1830000	1770000	1	0.99	1.27	1.23	1440000	1800000	1	1.25	122533
2843	O95630|STABP_HUMAN	9.31	158.62	10500000	13200000	8130000	10800000	1	1.26	0.78	1.03	11800000	9460000	1	0.8	48077
3170	Q02338|BDH_HUMAN	9.29	126.51	1620000	1540000	2130000	1950000	1	0.95	1.31	1.2	1580000	2040000	1	1.29	38157
3482	O75689|ADAP1_HUMAN	9.29	120.19	2630000	2580000	3560000	3330000	1	0.98	1.35	1.27	2610000	3440000	1	1.32	43395
1052	P05787|K2C8_HUMAN	9.25	198.56	3290000	3420000	4450000	4460000	1	1.04	1.35	1.36	3360000	4450000	1	1.33	53704
578	O75891|AL1L1_HUMAN	9.24	266.79	7130000	7130000	5670000	5820000	1	1	0.79	0.82	7130000	5740000	1	0.81	98829
1920	tr|F8W031|F8W031_HUMAN	9.23	216.96	5820000	5510000	7020000	7040000	1	0.95	1.21	1.21	5660000	7030000	1	1.24	29224
2359	Q16288|NTRK3_HUMAN	9.17	203.87	1980000	1970000	2450000	2440000	1	0.99	1.24	1.23	1970000	2440000	1	1.24	94428
2669	P00403|COX2_HUMAN	9.15	130.65	5430000	5510000	4090000	4100000	1	1.01	0.75	0.75	5470000	4100000	1	0.75	25565
1448	Q9HC35|EMAL4_HUMAN	9.1	250.12	5560000	5710000	7080000	6870000	1	1.03	1.27	1.24	5630000	6980000	1	1.24	108916
3298	Q93077|H2A1C_HUMAN	9.09	253.1	17400000	17800000	23700000	19900000	1	1.03	1.36	1.14	17600000	21800000	1	1.24	14105
3299	Q7L7L0|H2A3_HUMAN	9.09	253.1	17400000	17800000	23700000	19900000	1	1.03	1.36	1.14	17600000	21800000	1	1.24	14121
3300	P04908|H2A1B_HUMAN	9.09	253.1	17400000	17800000	23700000	19900000	1	1.03	1.36	1.14	17600000	21800000	1	1.24	14135
3688	Q8IZ40|RCOR2_HUMAN	9.09	126.96	548000	577000	725000	699000	1	1.05	1.32	1.27	563000	712000	1	1.27	58012
1510	P10619|PPGB_HUMAN	9.08	208.19	8120000	8050000	6690000	6380000	1	0.99	0.82	0.79	8090000	6530000	1	0.81	54466
683	Q96AQ6|PBIP1_HUMAN	9.07	287.09	12800000	13100000	10400000	10500000	1	1.03	0.82	0.82	13000000	10500000	1	0.81	80643
2179	P98172|EFNB1_HUMAN	9.06	179.53	6940000	6840000	8820000	8220000	1	0.99	1.27	1.19	6890000	8520000	1	1.24	38007
4468	P49441|INPP_HUMAN	9	118.64	2150000	2140000	1520000	1770000	1	0.99	0.71	0.83	2140000	1650000	1	0.77	43998
1412	Q92522|H1X_HUMAN	8.96	227.5	21800000	23500000	26300000	29600000	1	1.08	1.21	1.36	22700000	28000000	1	1.24	22487
3430	O75380|NDUS6_HUMAN	8.96	143.48	2360000	2400000	1930000	1920000	1	1.02	0.82	0.81	2380000	1930000	1	0.81	13712
3357	P09382|LEG1_HUMAN	8.95	236.37	20000000	20100000	16200000	16300000	1	1	0.81	0.81	20100000	16200000	1	0.81	14716
2162	Q9NW64|RBM22_HUMAN	8.93	185.78	5980000	6190000	7700000	7330000	1	1.03	1.29	1.23	6090000	7520000	1	1.24	46896
3912	P17302|CXA1_HUMAN	8.93	107.07	378000	386000	270000	287000	1	1.02	0.71	0.76	382000	278000	1	0.73	43008
1493	Q9HCB6|SPON1_HUMAN	8.89	172.35	4030000	3920000	3250000	3140000	1	0.97	0.81	0.78	3970000	3190000	1	0.8	90974
1433	P50579|MAP2_HUMAN	8.88	247.52	5570000	5610000	6980000	6820000	1	1.01	1.25	1.22	5590000	6900000	1	1.23	52892
899	Q9P1Y5|CAMP3_HUMAN	8.86	214.51	7290000	7330000	9260000	8780000	1	1.01	1.27	1.2	7310000	9020000	1	1.23	134750
2830	Q9P2W9|STX18_HUMAN	8.85	158.62	1770000	1790000	1440000	1450000	1	1.01	0.81	0.81	1780000	1440000	1	0.81	38674
1325	P17050|NAGAB_HUMAN	8.82	235.47	9010000	9180000	7500000	7250000	1	1.02	0.83	0.81	9100000	7380000	1	0.81	46565
895	Q96FC7|PHIPL_HUMAN	8.82	229.97	24000000	24900000	19300000	20300000	1	1.04	0.8	0.85	24400000	19800000	1	0.81	42486
1549	P13521|SCG2_HUMAN	8.82	206.87	7790000	7580000	6230000	6240000	1	0.97	0.8	0.8	7690000	6240000	1	0.81	70941
3686	Q96KN1|FA84B_HUMAN	8.82	141.62	1650000	1660000	1290000	1390000	1	1.01	0.79	0.84	1650000	1340000	1	0.81	34474
1890	P84098|RL19_HUMAN	8.81	181.52	13100000	13600000	16800000	16200000	1	1.03	1.27	1.23	13400000	16500000	1	1.23	23466
2535	P02462|CO4A1_HUMAN	8.78	200.07	1240000	1360000	1070000	1040000	1	1.09	0.86	0.84	1300000	1050000	1	0.81	160615
3569	O75368|SH3L1_HUMAN	8.74	213.83	5500000	6050000	4610000	4770000	1	1.1	0.84	0.87	5770000	4690000	1	0.81	12774
2422	P62910|RL32_HUMAN	8.71	159.69	12100000	12300000	15100000	14900000	1	1.02	1.25	1.24	12200000	15000000	1	1.23	15860
2234	Q15819|UB2V2_HUMAN	8.7	250.15	8240000	8120000	10300000	9820000	1	0.99	1.25	1.19	8180000	10100000	1	1.23	16363
432	Q8WZA9|IRGQ_HUMAN	8.68	315.58	28500000	28800000	34900000	35700000	1	1.01	1.22	1.25	28700000	35300000	1	1.23	62717
839	Q6YN16|HSDL2_HUMAN	8.67	254.85	12700000	13100000	9560000	11500000	1	1.03	0.75	0.9	12900000	10500000	1	0.81	45395
2781	Q8IZL8|PELP1_HUMAN	8.67	178.08	2320000	2290000	2920000	2750000	1	0.99	1.26	1.19	2310000	2840000	1	1.23	119700
5633	Q8WYP3|RIN2_HUMAN	8.67	84.75	2130	0	0	0	1	0	0	0	1060	0	1	0	100163
850	Q8IYB3|SRRM1_HUMAN	8.66	198.33	3720000	3790000	4780000	4580000	1	1.02	1.28	1.23	3760000	4680000	1	1.25	102335
996	P15586|GNS_HUMAN	8.64	265.74	17700000	18100000	14700000	14400000	1	1.03	0.83	0.82	17900000	14500000	1	0.81	62082
3004	P10599|THIO_HUMAN	8.64	191.52	22600000	22800000	18500000	18500000	1	1.01	0.82	0.82	22700000	18500000	1	0.81	11737
2492	P46778|RL21_HUMAN	8.64	172.46	10800000	10700000	13000000	13400000	1	1	1.21	1.24	10700000	13200000	1	1.23	18565
3971	Q9NW68|BSDC1_HUMAN	8.64	117.97	877000	900000	735000	675000	1	1.03	0.84	0.77	889000	705000	1	0.79	47163
2665	P19320|VCAM1_HUMAN	8.6	147.74	1300000	1330000	1720000	1680000	1	1.03	1.33	1.29	1320000	1700000	1	1.29	81276
3640	Q9UJY1|HSPB8_HUMAN	8.6	134.02	2500000	2530000	2030000	2070000	1	1.01	0.81	0.83	2520000	2050000	1	0.81	21604
3099	Q92597|NDRG1_HUMAN	8.58	149.73	1110000	1010000	1360000	1270000	1	0.91	1.23	1.14	1060000	1320000	1	1.24	42835
2408	Q6ZWB6|KCTD8_HUMAN	8.57	175.69	1040000	976000	804000	838000	1	0.94	0.77	0.81	1010000	821000	1	0.81	52440
832	Q9H425|CA198_HUMAN	8.54	252.76	11000000	11100000	8940000	9080000	1	1.01	0.81	0.83	11100000	9010000	1	0.81	36346
27	P07437|TBB5_HUMAN	8.52	512.29	147000000	156000000	173000000	198000000	1	1.06	1.18	1.35	151000000	186000000	1	1.23	49671
2000	O94805|ACL6B_HUMAN	8.49	171.76	4610000	4640000	5650000	5690000	1	1.01	1.23	1.23	4620000	5670000	1	1.23	46877
1108	P18124|RL7_HUMAN	8.47	223.56	23200000	22400000	28300000	27600000	1	0.97	1.22	1.19	22800000	27900000	1	1.23	29226
2361	Q96EP5|DAZP1_HUMAN	8.43	191.79	4640000	4700000	5870000	5580000	1	1.01	1.26	1.2	4670000	5720000	1	1.22	43383
5085	Q9H165|BC11A_HUMAN	8.43	91.3	377000	429000	861000	850000	1	1.14	2.29	2.26	403000	856000	1	2.12	91197
1031	P06865|HEXA_HUMAN	8.4	221.61	12500000	12400000	10300000	9990000	1	0.99	0.82	0.8	12400000	10200000	1	0.82	60703
2056	Q14571|ITPR2_HUMAN	8.39	191.31	911000	895000	730000	734000	1	0.98	0.8	0.81	903000	732000	1	0.81	308062
3700	P35556|FBN2_HUMAN	8.39	128.89	697000	667000	922000	863000	1	0.96	1.32	1.24	682000	893000	1	1.31	314775
2586	Q8WY54|PPM1E_HUMAN	8.38	169.92	2140000	2190000	2690000	2610000	1	1.03	1.26	1.22	2170000	2650000	1	1.22	85002
253	P68133|ACTS_HUMAN	8.37	362.3	35000000	35600000	27700000	30000000	1	1.02	0.79	0.86	35300000	28800000	1	0.82	42051
257	P68032|ACTC_HUMAN	8.37	362.3	35000000	35600000	27700000	30000000	1	1.02	0.79	0.86	35300000	28800000	1	0.82	42019
927	Q9H6K5|PRR36_HUMAN	8.37	244.79	3800000	3870000	4730000	4660000	1	1.02	1.25	1.23	3840000	4700000	1	1.22	132748
3630	Q8NC96|NECP1_HUMAN	8.36	135.05	2260000	2330000	2980000	3010000	1	1.03	1.32	1.33	2300000	3000000	1	1.3	29737
2897	O95425|SVIL_HUMAN	8.35	143.98	1280000	1180000	1610000	1610000	1	0.92	1.25	1.26	1230000	1610000	1	1.31	247744
2500	P39060|COIA1_HUMAN	8.34	185.33	4560000	4600000	3700000	3800000	1	1.01	0.81	0.83	4580000	3750000	1	0.82	178187
741	O43290|SNUT1_HUMAN	8.3	243.14	7370000	7320000	9110000	8840000	1	0.99	1.24	1.2	7340000	8980000	1	1.22	90255
1077	P08621|RU17_HUMAN	8.28	249.05	14200000	14200000	17600000	17200000	1	1	1.24	1.21	14200000	17400000	1	1.22	51557
1376	Q14123|PDE1C_HUMAN	8.27	202.76	6900000	7060000	5650000	5770000	1	1.02	0.82	0.84	6980000	5710000	1	0.82	80760
3431	P52799|EFNB2_HUMAN	8.26	138.58	2040000	2140000	2550000	2560000	1	1.05	1.25	1.25	2090000	2550000	1	1.22	36923
937	Q08170|SRSF4_HUMAN	8.24	203.98	9610000	9570000	12100000	11500000	1	1	1.26	1.19	9590000	11800000	1	1.23	56678
3005	P11166|GTR1_HUMAN	8.24	157.63	2540000	2650000	3110000	3230000	1	1.04	1.22	1.27	2590000	3170000	1	1.22	54084
2903	Q9H8H3|MET7A_HUMAN	8.21	175.67	4890000	5000000	3950000	4150000	1	1.02	0.81	0.85	4940000	4050000	1	0.82	28319
2037	Q9BRX8|F213A_HUMAN	8.19	235.8	14900000	14200000	12000000	11900000	1	0.95	0.8	0.8	14500000	11900000	1	0.82	25764
3911	P28340|DPOD1_HUMAN	8.19	113.95	1310000	1350000	1840000	1830000	1	1.03	1.41	1.4	1330000	1840000	1	1.38	123631
2813	P35637|FUS_HUMAN	8.16	229.09	13000000	13200000	16100000	15800000	1	1.01	1.24	1.22	13100000	16000000	1	1.22	53426
3360	O95785|WIZ_HUMAN	8.16	167.56	373000	406000	466000	484000	1	1.09	1.25	1.3	390000	475000	1	1.22	178673
1320	Q01581|HMCS1_HUMAN	8.13	261.28	8890000	9010000	10900000	10900000	1	1.01	1.23	1.22	8950000	10900000	1	1.22	57294
533	O75116|ROCK2_HUMAN	8.13	247.52	10900000	11000000	13500000	13300000	1	1.01	1.24	1.21	11000000	13400000	1	1.22	160899
1768	O95487|SC24B_HUMAN	8.13	210.17	3650000	3660000	2970000	3030000	1	1	0.81	0.83	3660000	3000000	1	0.82	137417
1735	Q86VM9|ZCH18_HUMAN	8.11	168.35	2750000	2820000	3620000	3390000	1	1.02	1.31	1.23	2790000	3500000	1	1.26	106379
1051	P54802|ANAG_HUMAN	8.1	230.79	10900000	11000000	8990000	8950000	1	1.01	0.83	0.82	10900000	8970000	1	0.82	82266
3842	Q03426|KIME_HUMAN	8.1	106.06	4790000	4550000	5890000	5870000	1	0.95	1.23	1.23	4670000	5880000	1	1.26	42451
428	P31943|HNRH1_HUMAN	8.08	302.72	10200000	10500000	12700000	12600000	1	1.03	1.24	1.23	10400000	12600000	1	1.22	49229
577	O94776|MTA2_HUMAN	8.08	257.13	10200000	10200000	12600000	12200000	1	1	1.24	1.2	10200000	12400000	1	1.22	75023
702	P07339|CATD_HUMAN	8.06	327.22	12700000	13000000	10600000	10500000	1	1.02	0.84	0.83	12900000	10600000	1	0.82	44552
1783	Q16629|SRSF7_HUMAN	8.06	235.25	14600000	15200000	18200000	18100000	1	1.04	1.24	1.23	14900000	18100000	1	1.22	27367
3108	P21695|GPDA_HUMAN	8.06	105.14	2410000	2520000	1690000	1850000	1	1.05	0.7	0.77	2470000	1770000	1	0.72	37568
194	P24821|TENA_HUMAN	8.02	412.09	99900000	99700000	80300000	83800000	1	1	0.8	0.84	99800000	82000000	1	0.82	240851
2910	Q96PQ0|SORC2_HUMAN	8	164.1	941000	975000	1220000	1210000	1	1.04	1.3	1.28	958000	1210000	1	1.27	128151
148	Q13263|TIF1B_HUMAN	7.98	354.82	52000000	47100000	58000000	62600000	1	0.91	1.11	1.2	49600000	60300000	1	1.22	88550
990	Q96CV9|OPTN_HUMAN	7.97	220.32	12700000	13100000	9950000	11300000	1	1.04	0.79	0.89	12900000	10600000	1	0.82	65921
1175	Q6UXK2|ISLR2_HUMAN	7.95	184.47	3010000	3050000	3730000	3700000	1	1.01	1.24	1.23	3030000	3710000	1	1.23	78990
3337	Q00765|REEP5_HUMAN	7.95	117.71	17900000	17500000	13400000	13200000	1	0.98	0.75	0.74	17700000	13300000	1	0.75	21493
56	Q9BPU6|DPYL5_HUMAN	7.93	406.81	204000000	191000000	241000000	239000000	1	0.94	1.18	1.17	198000000	240000000	1	1.21	61421
2254	O43592|XPOT_HUMAN	7.93	187.4	8160000	7740000	10400000	8960000	1	0.95	1.27	1.1	7950000	9660000	1	1.21	109964
6660	O43861|ATP9B_HUMAN	7.92	95.57	98000	123000	763000	728000	1	1.25	7.79	7.42	110000	745000	1	6.76	129303
1398	P51858|HDGF_HUMAN	7.91	229.71	20300000	20800000	16500000	17300000	1	1.02	0.81	0.85	20500000	16900000	1	0.82	26788
5879	Q6ZMP0|THSD4_HUMAN	7.91	107.81	984000	926000	513000	518000	1	0.94	0.52	0.53	955000	516000	1	0.54	112450
890	Q15555|MARE2_HUMAN	7.89	297.27	24900000	25500000	30600000	30500000	1	1.03	1.23	1.23	25200000	30500000	1	1.21	37031
513	Q8WWQ0|PHIP_HUMAN	7.88	259.53	6270000	6320000	7610000	7670000	1	1.01	1.21	1.22	6300000	7640000	1	1.21	206688
418	Q08945|SSRP1_HUMAN	7.87	276.6	25100000	24900000	30700000	29900000	1	0.99	1.23	1.19	25000000	30300000	1	1.21	81075
3681	P42766|RL35_HUMAN	7.86	106.15	4840000	4760000	6720000	6400000	1	0.98	1.39	1.32	4800000	6560000	1	1.37	14551
405	P55196|AFAD_HUMAN	7.85	271.14	11900000	12100000	14600000	14400000	1	1.02	1.23	1.21	12000000	14500000	1	1.21	206803
624	P17812|PYRG1_HUMAN	7.83	249.18	14700000	14900000	18200000	17700000	1	1.01	1.24	1.2	14800000	17900000	1	1.21	66690
3466	P00441|SODC_HUMAN	7.81	307.27	109000000	109000000	90000000	90100000	1	1	0.82	0.82	109000000	90100000	1	0.83	15936
2297	Q9BQ70|TCF25_HUMAN	7.8	166.06	2460000	2510000	3060000	2950000	1	1.02	1.25	1.2	2480000	3010000	1	1.21	76667
400	P24928|RPB1_HUMAN	7.79	293.85	11500000	11400000	14100000	13600000	1	0.99	1.23	1.18	11400000	13900000	1	1.21	217174
1070	P09429|HMGB1_HUMAN	7.78	251.71	36900000	36100000	45300000	43100000	1	0.98	1.23	1.17	36500000	44200000	1	1.21	24894
920	P51513|NOVA1_HUMAN	7.77	242.1	3860000	3960000	4830000	4640000	1	1.03	1.25	1.2	3910000	4740000	1	1.21	52056
946	Q96PU5|NED4L_HUMAN	7.77	230.31	3690000	3750000	4540000	4480000	1	1.02	1.23	1.21	3720000	4510000	1	1.21	111932
3052	P32322|P5CR1_HUMAN	7.77	148.88	2540000	2380000	3090000	2870000	1	0.93	1.21	1.13	2460000	2980000	1	1.21	33361
1534	Q96SI9|STRBP_HUMAN	7.75	229.57	4180000	4150000	5200000	4890000	1	0.99	1.24	1.17	4170000	5050000	1	1.21	73653
769	Q14168|MPP2_HUMAN	7.75	221.12	8180000	8760000	10100000	10500000	1	1.07	1.23	1.28	8470000	10300000	1	1.21	64581
378	Q05639|EF1A2_HUMAN	7.74	311.82	20600000	20400000	24700000	24900000	1	0.99	1.2	1.21	20500000	24800000	1	1.21	50470
1450	Q7Z3K3|POGZ_HUMAN	7.74	210.58	4830000	4800000	5890000	5770000	1	0.99	1.22	1.19	4820000	5830000	1	1.21	155343
2332	Q8N158|GPC2_HUMAN	7.74	155.36	2780000	2830000	3630000	3550000	1	1.02	1.31	1.28	2800000	3590000	1	1.28	62830
1048	P62995|TRA2B_HUMAN	7.72	252.97	17600000	16900000	21200000	20600000	1	0.96	1.21	1.17	17300000	20900000	1	1.21	33666
1506	Q92878|RAD50_HUMAN	7.71	200.67	4700000	4700000	5740000	5640000	1	1	1.22	1.2	4700000	5690000	1	1.21	153892
3380	P09132|SRP19_HUMAN	7.7	186.34	1510000	1460000	1860000	1730000	1	0.97	1.23	1.15	1480000	1790000	1	1.21	16156
654	Q15181|IPYR_HUMAN	7.68	283.04	38800000	38500000	47200000	46300000	1	0.99	1.22	1.19	38600000	46700000	1	1.21	32660
3777	P13473|LAMP2_HUMAN	7.68	113.43	5160000	5260000	4230000	3960000	1	1.02	0.82	0.77	5210000	4100000	1	0.79	44961
1755	P35520|CBS_HUMAN	7.67	214.91	4650000	4720000	5720000	5610000	1	1.02	1.23	1.21	4690000	5670000	1	1.21	60587
1756	P0DN79|CBSL_HUMAN	7.67	214.91	4650000	4720000	5720000	5610000	1	1.02	1.23	1.21	4690000	5670000	1	1.21	60587
1267	O43795|MYO1B_HUMAN	7.65	212.86	5500000	5740000	6690000	6890000	1	1.04	1.22	1.25	5620000	6790000	1	1.21	131985
1136	Q14694|UBP10_HUMAN	7.65	206.24	6730000	6640000	8290000	7870000	1	0.99	1.23	1.17	6690000	8080000	1	1.21	87134
889	P06753|TPM3_HUMAN	7.61	271.23	11000000	10600000	8950000	8920000	1	0.96	0.81	0.81	10800000	8930000	1	0.83	32950
3502	Q8IY67|RAVR1_HUMAN	7.61	139.3	1260000	1250000	1530000	1520000	1	0.99	1.21	1.2	1250000	1520000	1	1.21	63877
3532	Q13491|GPM6B_HUMAN	7.59	131.35	1380000	1320000	1110000	1060000	1	0.95	0.8	0.76	1350000	1080000	1	0.8	28989
1364	P00966|ASSY_HUMAN	7.58	199.43	5080000	5280000	4240000	4340000	1	1.04	0.84	0.86	5180000	4290000	1	0.83	46530
1322	Q9P0Z9|SOX_HUMAN	7.55	196.84	5750000	5800000	4830000	4750000	1	1.01	0.84	0.83	5770000	4790000	1	0.83	44066
2734	P16930|FAAA_HUMAN	7.54	157	5510000	5670000	4750000	4510000	1	1.03	0.86	0.82	5590000	4630000	1	0.83	46374
2577	O00461|GOLI4_HUMAN	7.51	180.1	2250000	2260000	2800000	2640000	1	1	1.24	1.17	2250000	2720000	1	1.21	81880
1870	Q9P107|GMIP_HUMAN	7.51	170.67	1960000	2060000	2460000	2460000	1	1.05	1.26	1.26	2010000	2460000	1	1.23	106683
1339	Q8TEM1|PO210_HUMAN	7.49	200.09	6390000	6560000	7830000	7790000	1	1.03	1.23	1.22	6480000	7810000	1	1.21	205109
2078	P32455|GBP1_HUMAN	7.48	180.42	4850000	4790000	3870000	4130000	1	0.99	0.8	0.85	4820000	4000000	1	0.83	67931
140	P11216|PYGB_HUMAN	7.47	368.68	64100000	65000000	54100000	53100000	1	1.01	0.84	0.83	64600000	53600000	1	0.83	96696
1314	P35659|DEK_HUMAN	7.46	233.42	28700000	28700000	34800000	34300000	1	1	1.21	1.2	28700000	34500000	1	1.2	42674
1328	P56545|CTBP2_HUMAN	7.46	228.78	5190000	5200000	6440000	6080000	1	1	1.24	1.17	5200000	6260000	1	1.2	48945
2887	P43004|EAA2_HUMAN	7.46	166.38	2360000	2510000	2940000	2960000	1	1.07	1.25	1.26	2430000	2950000	1	1.21	62104
3323	Q96MZ0|GD1L1_HUMAN	7.46	154.57	1540000	1560000	1910000	1820000	1	1.02	1.24	1.19	1550000	1870000	1	1.2	41973
2744	Q9H5K3|SG196_HUMAN	7.46	145.05	1110000	1120000	1310000	1430000	1	1.01	1.18	1.29	1120000	1370000	1	1.23	40050
35	P20700|LMNB1_HUMAN	7.45	369.51	79700000	80700000	96400000	96800000	1	1.01	1.21	1.21	80200000	96600000	1	1.2	66408
1616	Q02809|PLOD1_HUMAN	7.44	164.18	4370000	4470000	5370000	5380000	1	1.02	1.23	1.23	4420000	5370000	1	1.22	83550
3437	Q9Y6K1|DNM3A_HUMAN	7.44	133.82	1780000	1720000	2250000	2140000	1	0.97	1.26	1.2	1750000	2190000	1	1.25	101858
3612	P23508|CRCM_HUMAN	7.43	146.01	1240000	1200000	1030000	991000	1	0.97	0.84	0.8	1220000	1010000	1	0.83	93027
3526	Q15007|FL2D_HUMAN	7.41	127.36	1940000	1960000	2390000	2410000	1	1.01	1.23	1.24	1950000	2400000	1	1.23	44244
105	P49419|AL7A1_HUMAN	7.39	359.22	60600000	60300000	50300000	50100000	1	1	0.83	0.83	60400000	50200000	1	0.83	58487
2610	Q8NFH5|NUP53_HUMAN	7.39	152.16	1520000	1490000	1860000	1760000	1	0.98	1.23	1.16	1510000	1810000	1	1.2	34774
2971	P49005|DPOD2_HUMAN	7.39	137.6	1350000	1360000	1710000	1600000	1	1.01	1.27	1.18	1350000	1650000	1	1.22	51290
3586	Q9Y692|GMEB1_HUMAN	7.39	129.27	1730000	1700000	2120000	2010000	1	0.98	1.23	1.16	1710000	2060000	1	1.2	62591
763	P00390|GSHR_HUMAN	7.37	268.66	21300000	22500000	18100000	18300000	1	1.06	0.85	0.86	21900000	18200000	1	0.83	56257
153	P23246|SFPQ_HUMAN	7.36	370.63	56800000	58700000	70000000	68900000	1	1.03	1.23	1.21	57700000	69400000	1	1.2	76150
447	A6NHR9|SMHD1_HUMAN	7.36	278.17	11400000	11700000	14100000	13800000	1	1.02	1.23	1.2	11600000	13900000	1	1.2	226372
1087	Q06203|PUR1_HUMAN	7.36	229	8290000	8310000	10100000	9860000	1	1	1.22	1.19	8300000	9980000	1	1.2	57399
564	Q8WXH0|SYNE2_HUMAN	7.35	314.82	19000000	19600000	23400000	23100000	1	1.03	1.23	1.21	19300000	23200000	1	1.2	796457
1987	Q9NTJ3|SMC4_HUMAN	7.34	196.42	3450000	3660000	4300000	4240000	1	1.06	1.25	1.23	3550000	4270000	1	1.2	147182
2163	P01111|RASN_HUMAN	7.33	250.83	2850000	2890000	3440000	3450000	1	1.01	1.21	1.21	2870000	3450000	1	1.2	21229
275	Q96F07|CYFP2_HUMAN	7.3	325.18	9370000	9390000	11500000	11100000	1	1	1.22	1.18	9380000	11300000	1	1.2	148398
1649	P51572|BAP31_HUMAN	7.3	201.11	17400000	17300000	13900000	15000000	1	0.99	0.8	0.86	17300000	14400000	1	0.83	27992
1624	P06493|CDK1_HUMAN	7.3	171.01	2270000	2330000	2880000	2790000	1	1.03	1.27	1.23	2300000	2830000	1	1.23	34095
1555	O14773|TPP1_HUMAN	7.29	245.38	14600000	14700000	12300000	12100000	1	1.01	0.84	0.83	14700000	12200000	1	0.83	61248
967	Q08257|QOR_HUMAN	7.28	279.44	26500000	27000000	22200000	22300000	1	1.02	0.84	0.84	26700000	22200000	1	0.83	35207
2449	Q16537|2A5E_HUMAN	7.27	153.63	3850000	4040000	4870000	5100000	1	1.05	1.26	1.32	3950000	4980000	1	1.26	54699
374	P27708|PYR1_HUMAN	7.25	287.82	13100000	12300000	15600000	14800000	1	0.94	1.2	1.13	12700000	15200000	1	1.2	242981
1734	Q4J6C6|PPCEL_HUMAN	7.25	235.15	4140000	4260000	4980000	5100000	1	1.03	1.2	1.23	4200000	5040000	1	1.2	83927
2727	Q9NUD5|ZCHC3_HUMAN	7.25	158.42	1510000	1540000	1850000	1820000	1	1.02	1.22	1.2	1530000	1830000	1	1.2	43618
1377	Q13683|ITA7_HUMAN	7.23	203.91	5070000	5100000	4300000	4180000	1	1.01	0.85	0.82	5090000	4240000	1	0.83	128948
558	Q13153|PAK1_HUMAN	7.19	271.28	8230000	8310000	10200000	9670000	1	1.01	1.24	1.17	8270000	9920000	1	1.2	60647
3432	P26022|PTX3_HUMAN	7.19	125.88	1900000	1980000	2510000	2500000	1	1.04	1.32	1.32	1940000	2500000	1	1.29	41976
957	P49756|RBM25_HUMAN	7.18	222.57	7750000	7740000	9440000	9130000	1	1	1.22	1.18	7740000	9280000	1	1.2	100186
760	P15880|RS2_HUMAN	7.17	262.54	37000000	36000000	44900000	42600000	1	0.97	1.21	1.15	36500000	43700000	1	1.2	31324
1035	Q7KZI7|MARK2_HUMAN	7.17	211.69	2820000	2600000	3550000	2950000	1	0.92	1.26	1.04	2710000	3250000	1	1.2	87911
614	Q15067|ACOX1_HUMAN	7.16	296.62	13200000	13100000	10900000	11100000	1	0.99	0.83	0.84	13200000	11000000	1	0.83	74424
425	O75962|TRIO_HUMAN	7.16	272.95	7660000	7820000	9300000	9250000	1	1.02	1.21	1.21	7740000	9270000	1	1.2	346901
1449	P16278|BGAL_HUMAN	7.14	219.73	15200000	15400000	12700000	12900000	1	1.01	0.84	0.84	15300000	12800000	1	0.83	76075
1685	O14497|ARI1A_HUMAN	7.12	163.47	3020000	2950000	3460000	3940000	1	0.98	1.15	1.31	2980000	3700000	1	1.24	242042
538	P16152|CBR1_HUMAN	7.1	301.5	26600000	27200000	22500000	22400000	1	1.02	0.85	0.84	26900000	22500000	1	0.84	30375
1219	P07099|HYEP_HUMAN	7.1	291.13	14400000	14800000	12000000	12300000	1	1.03	0.84	0.86	14600000	12200000	1	0.84	52949
764	Q9UMS4|PRP19_HUMAN	7.1	276.3	29300000	28900000	35400000	34300000	1	0.99	1.21	1.17	29100000	34800000	1	1.2	55181
197	Q02880|TOP2B_HUMAN	7.08	377.7	33500000	33900000	41600000	39000000	1	1.01	1.24	1.16	33700000	40300000	1	1.2	183266
1434	Q92879|CELF1_HUMAN	7.07	211.41	4980000	4840000	4080000	4130000	1	0.97	0.82	0.83	4910000	4110000	1	0.84	52063
91	O75874|IDHC_HUMAN	7.05	339.96	58700000	54000000	65300000	69600000	1	0.92	1.11	1.18	56400000	67400000	1	1.2	46659
1107	Q9Y6W5|WASF2_HUMAN	7.03	219.85	11800000	11800000	9890000	9810000	1	1	0.84	0.83	11800000	9850000	1	0.84	54284
3611	Q96N03|VTM2L_HUMAN	7	128.57	2050000	1940000	1670000	1550000	1	0.95	0.81	0.75	2000000	1610000	1	0.8	22349
2783	Q86W42|THOC6_HUMAN	6.99	170.48	2280000	2310000	2770000	2710000	1	1.01	1.22	1.19	2290000	2740000	1	1.19	37535
1990	P30039|PBLD_HUMAN	6.96	234.86	5820000	5850000	4920000	4860000	1	1.01	0.85	0.84	5830000	4890000	1	0.84	31785
1238	Q14554|PDIA5_HUMAN	6.95	237.74	15000000	14500000	12400000	12200000	1	0.96	0.83	0.82	14700000	12300000	1	0.84	59594
1885	Q9H0A0|NAT10_HUMAN	6.94	183.84	3000000	3130000	3630000	3690000	1	1.04	1.21	1.23	3070000	3660000	1	1.19	115730
3516	Q96EV2|RBM33_HUMAN	6.94	132.93	1130000	1140000	1390000	1370000	1	1.02	1.23	1.21	1130000	1380000	1	1.21	129986
351	Q14683|SMC1A_HUMAN	6.93	291.97	24600000	24300000	29300000	29100000	1	0.99	1.19	1.18	24500000	29200000	1	1.19	143233
1836	P35249|RFC4_HUMAN	6.92	163.03	6350000	6310000	7780000	7380000	1	0.99	1.23	1.16	6330000	7580000	1	1.2	39682
1689	Q9P2T1|GMPR2_HUMAN	6.9	189.15	2790000	2870000	2360000	2390000	1	1.03	0.85	0.86	2830000	2370000	1	0.84	37874
476	P61981|1433G_HUMAN	6.89	341.56	42700000	42800000	52700000	49200000	1	1	1.23	1.15	42700000	51000000	1	1.19	28303
4030	P83881|RL36A_HUMAN	6.87	144.58	1860000	1920000	2560000	2470000	1	1.03	1.37	1.33	1890000	2520000	1	1.33	12441
1928	Q15700|DLG2_HUMAN	6.86	187.82	621000	593000	723000	741000	1	0.95	1.16	1.19	607000	732000	1	1.21	97552
791	P11766|ADHX_HUMAN	6.85	339.12	54700000	55300000	43900000	48400000	1	1.01	0.8	0.88	55000000	46200000	1	0.84	39724
1527	P31146|COR1A_HUMAN	6.85	199.36	12100000	11000000	14300000	13400000	1	0.9	1.18	1.1	11600000	13900000	1	1.2	51026
2383	P46782|RS5_HUMAN	6.84	181.19	4480000	4610000	5500000	5330000	1	1.03	1.23	1.19	4550000	5420000	1	1.19	22876
2741	Q96QC0|PP1RA_HUMAN	6.84	157.83	4280000	4330000	5210000	5220000	1	1.01	1.22	1.22	4300000	5220000	1	1.21	99058
1554	O15042|SR140_HUMAN	6.83	197.11	5870000	5830000	7020000	6910000	1	0.99	1.2	1.18	5850000	6960000	1	1.19	118292
1655	P62280|RS11_HUMAN	6.83	194.83	13600000	13900000	15300000	17500000	1	1.02	1.12	1.28	13800000	16400000	1	1.19	18431
33	P04350|TBB4A_HUMAN	6.81	492.29	15900000	16500000	19200000	19500000	1	1.04	1.2	1.22	16200000	19300000	1	1.19	49586
2057	P33316|DUT_HUMAN	6.81	229.79	5180000	5330000	6190000	6320000	1	1.03	1.2	1.22	5250000	6250000	1	1.19	26563
1971	P14621|ACYP2_HUMAN	6.81	164.78	10400000	10300000	8660000	8710000	1	1	0.84	0.84	10300000	8680000	1	0.84	11140
4079	Q9Y5S9|RBM8A_HUMAN	6.81	136.71	2540000	2480000	3000000	2970000	1	0.97	1.18	1.17	2510000	2990000	1	1.19	19889
2914	Q8IXK0|PHC2_HUMAN	6.81	118.49	3200000	3190000	4440000	4170000	1	1	1.39	1.3	3200000	4310000	1	1.35	90713
1935	Q9P0K7|RAI14_HUMAN	6.8	179.15	2790000	2820000	3370000	3350000	1	1.01	1.21	1.2	2800000	3360000	1	1.2	110041
3803	O94880|PHF14_HUMAN	6.8	152.02	1290000	1280000	1540000	1510000	1	0.99	1.2	1.18	1280000	1520000	1	1.19	100053
2273	P07093|GDN_HUMAN	6.79	175.12	7190000	7230000	6140000	5970000	1	1.01	0.85	0.83	7210000	6060000	1	0.84	44002
2375	O95185|UNC5C_HUMAN	6.78	168.44	2320000	2280000	2000000	1870000	1	0.98	0.86	0.8	2300000	1930000	1	0.84	103146
2892	Q9H9B1|EHMT1_HUMAN	6.78	157	1380000	1470000	1690000	1710000	1	1.06	1.22	1.24	1430000	1700000	1	1.19	141466
1575	Q00577|PURA_HUMAN	6.77	219.46	17600000	17400000	14800000	14600000	1	0.99	0.84	0.83	17500000	14700000	1	0.84	34911
1457	Q9UPV7|PHF24_HUMAN	6.77	186.84	3460000	3540000	4250000	4160000	1	1.02	1.23	1.2	3500000	4200000	1	1.2	45192
2116	P18615|NELFE_HUMAN	6.76	169.56	2310000	2240000	2770000	2680000	1	0.97	1.2	1.16	2280000	2730000	1	1.2	43240
524	Q7Z2K8|GRIN1_HUMAN	6.75	254.49	9560000	9620000	11400000	11400000	1	1.01	1.2	1.19	9590000	11400000	1	1.19	102399
1479	Q9NRN7|ADPPT_HUMAN	6.75	191.55	15300000	15200000	18900000	17300000	1	0.99	1.24	1.13	15200000	18100000	1	1.19	35776
188	P49327|FAS_HUMAN	6.74	419.14	75500000	76400000	89300000	91200000	1	1.01	1.18	1.21	75900000	90300000	1	1.19	273424
2692	Q92947|GCDH_HUMAN	6.74	152.18	4020000	3800000	3440000	3130000	1	0.95	0.86	0.78	3910000	3290000	1	0.84	48127
1224	Q8N684|CPSF7_HUMAN	6.71	203.88	7500000	7240000	8710000	8810000	1	0.97	1.16	1.17	7370000	8760000	1	1.19	52050
1577	O43148|MCES_HUMAN	6.71	202.31	4470000	4730000	5480000	5450000	1	1.06	1.23	1.22	4600000	5460000	1	1.19	54844
1491	Q9Y6D9|MD1L1_HUMAN	6.71	177.97	4780000	4670000	5830000	5390000	1	0.98	1.22	1.13	4720000	5610000	1	1.19	83067
130	Q92841|DDX17_HUMAN	6.7	398.43	45600000	45900000	54600000	54100000	1	1.01	1.2	1.19	45700000	54300000	1	1.19	80273
4317	Q9H7C9|AAMDC_HUMAN	6.69	97.76	1990000	1940000	1560000	1560000	1	0.97	0.78	0.78	1970000	1560000	1	0.79	13332
348	O00291|HIP1_HUMAN	6.67	293.6	12600000	12800000	15000000	15100000	1	1.02	1.19	1.2	12700000	15100000	1	1.19	116221
1076	Q9NZB2|F120A_HUMAN	6.67	230.53	5450000	5540000	4740000	4520000	1	1.02	0.87	0.83	5490000	4630000	1	0.84	121888
489	Q9UIW2|PLXA1_HUMAN	6.65	277.71	13900000	13600000	16700000	16000000	1	0.98	1.2	1.15	13800000	16300000	1	1.19	211066
1778	Q9NP80|PLPL8_HUMAN	6.65	172.59	14800000	15200000	17900000	17700000	1	1.03	1.21	1.2	15000000	17800000	1	1.19	88477
2580	Q92688|AN32B_HUMAN	6.64	193.92	12000000	11200000	14000000	13500000	1	0.93	1.16	1.12	11600000	13800000	1	1.19	28788
733	P02649|APOE_HUMAN	6.63	229.38	11500000	11500000	9610000	9750000	1	1	0.84	0.85	11500000	9680000	1	0.84	36154
2160	Q9UHV9|PFD2_HUMAN	6.62	177.21	6480000	6760000	7820000	7880000	1	1.04	1.21	1.22	6620000	7850000	1	1.19	16648
1281	O60256|KPRB_HUMAN	6.61	250.84	5880000	5860000	6960000	6970000	1	1	1.18	1.18	5870000	6960000	1	1.19	40926
1217	P30837|AL1B1_HUMAN	6.61	231.12	9840000	9710000	12100000	11100000	1	0.99	1.23	1.13	9780000	11600000	1	1.19	57206
2811	Q9H7N4|SFR19_HUMAN	6.61	172.92	1970000	1910000	2350000	2250000	1	0.97	1.19	1.14	1940000	2300000	1	1.19	139269
4359	P55769|NH2L1_HUMAN	6.61	136.82	1970000	2100000	2400000	2430000	1	1.06	1.21	1.23	2030000	2410000	1	1.19	14174
2963	P62851|RS25_HUMAN	6.61	127.17	4440000	4450000	5730000	5440000	1	1	1.29	1.23	4440000	5580000	1	1.26	13742
279	Q6PCE3|PGM2L_HUMAN	6.6	314.85	17900000	18100000	21500000	21100000	1	1.01	1.2	1.18	18000000	21300000	1	1.19	70442
742	Q9UIG0|BAZ1B_HUMAN	6.59	260.1	11200000	11200000	13500000	13100000	1	1	1.2	1.17	11200000	13300000	1	1.19	170902
535	O14594|NCAN_HUMAN	6.58	281.12	15300000	15600000	13000000	13100000	1	1.02	0.85	0.85	15400000	13000000	1	0.84	143093
999	P48634|PRC2A_HUMAN	6.57	204.85	3860000	3730000	4660000	4400000	1	0.97	1.21	1.14	3790000	4530000	1	1.19	228861
1232	P51178|PLCD1_HUMAN	6.56	221.21	8270000	8230000	6910000	7010000	1	1	0.84	0.85	8250000	6960000	1	0.84	85665
2882	Q9BXW6|OSBL1_HUMAN	6.55	174.04	2800000	2880000	2320000	2480000	1	1.03	0.83	0.88	2840000	2400000	1	0.84	108470
2124	Q29RF7|PDS5A_HUMAN	6.55	171.4	3340000	3390000	4010000	3970000	1	1.01	1.2	1.19	3370000	3990000	1	1.18	150830
1081	Q9H0R4|HDHD2_HUMAN	6.54	294.43	15200000	15900000	12900000	13400000	1	1.04	0.85	0.88	15600000	13100000	1	0.84	28536
4038	Q9UD71|PPR1B_HUMAN	6.54	104.34	2130000	2020000	1740000	1550000	1	0.95	0.82	0.73	2080000	1650000	1	0.79	22963
1860	Q08752|PPID_HUMAN	6.53	200.87	3170000	3160000	3800000	3690000	1	1	1.2	1.16	3160000	3750000	1	1.18	40764
3665	O00151|PDLI1_HUMAN	6.53	147.9	3480000	3760000	4430000	4150000	1	1.08	1.27	1.19	3620000	4290000	1	1.18	36072
805	P28482|MK01_HUMAN	6.52	283.48	21400000	21000000	17700000	18100000	1	0.98	0.83	0.84	21200000	17900000	1	0.84	41390
3282	Q13526|PIN1_HUMAN	6.52	191.54	14500000	15400000	10500000	14800000	1	1.06	0.72	1.02	14900000	12600000	1	0.84	18243
2545	P35268|RL22_HUMAN	6.51	229.1	13000000	13200000	16100000	14900000	1	1.01	1.24	1.14	13100000	15500000	1	1.18	14787
1838	Q16576|RBBP7_HUMAN	6.51	227.59	3870000	4260000	4770000	4860000	1	1.1	1.23	1.25	4070000	4810000	1	1.18	47820
2612	O95793|STAU1_HUMAN	6.51	201.99	3650000	3670000	4350000	4310000	1	1.01	1.19	1.18	3660000	4330000	1	1.18	63182
1776	P52564|MP2K6_HUMAN	6.5	214.55	3350000	3280000	3980000	3860000	1	0.98	1.19	1.15	3310000	3920000	1	1.18	37492
1243	O76021|RL1D1_HUMAN	6.49	234.79	5140000	5060000	6290000	5780000	1	0.98	1.22	1.13	5100000	6030000	1	1.18	54973
3851	O43847|NRDC_HUMAN	6.48	149.7	2220000	2240000	2650000	2630000	1	1.01	1.19	1.18	2230000	2640000	1	1.18	131571
3132	Q8TEA8|DTD1_HUMAN	6.47	129.68	8890000	8820000	10300000	10700000	1	0.99	1.15	1.2	8860000	10500000	1	1.18	23424
1257	P62917|RL8_HUMAN	6.46	299.73	39700000	38900000	47300000	45600000	1	0.98	1.19	1.15	39300000	46500000	1	1.18	28025
474	Q92823|NRCAM_HUMAN	6.46	289.29	13700000	13500000	16100000	16100000	1	0.98	1.17	1.17	13600000	16100000	1	1.18	143889
4032	Q0VG06|FP100_HUMAN	6.46	120.86	2080000	2000000	2560000	2520000	1	0.96	1.23	1.21	2040000	2540000	1	1.24	93433
2485	Q9NY59|NSMA2_HUMAN	6.44	160.59	750000	743000	884000	906000	1	0.99	1.18	1.21	747000	895000	1	1.2	71081
481	Q13177|PAK2_HUMAN	6.43	296.44	9600000	9910000	11600000	11500000	1	1.03	1.2	1.2	9750000	11500000	1	1.18	58043
3036	Q6P587|FAHD1_HUMAN	6.43	217.79	5520000	5360000	6550000	6320000	1	0.97	1.18	1.14	5440000	6430000	1	1.18	24843
2922	Q9HC52|CBX8_HUMAN	6.42	153.27	2750000	2630000	3290000	3080000	1	0.96	1.2	1.12	2690000	3180000	1	1.18	43396
4519	O14880|MGST3_HUMAN	6.41	95.29	8900000	8910000	7530000	7260000	1	1	0.85	0.82	8910000	7400000	1	0.83	16516
547	P43490|NAMPT_HUMAN	6.4	260.19	29100000	30200000	33500000	36600000	1	1.04	1.15	1.25	29700000	35000000	1	1.18	55521
4096	O75940|SPF30_HUMAN	6.39	106.13	799000	799000	991000	1010000	1	1	1.24	1.27	799000	1000000	1	1.25	26711
1830	P07858|CATB_HUMAN	6.38	237.72	12200000	12600000	10400000	10500000	1	1.03	0.86	0.87	12400000	10500000	1	0.85	37822
1193	Q9Y4J8|DTNA_HUMAN	6.38	216.2	5460000	5300000	4590000	4510000	1	0.97	0.84	0.83	5380000	4550000	1	0.85	83901
1769	P62249|RS16_HUMAN	6.38	191.08	27400000	26200000	33000000	30300000	1	0.96	1.21	1.11	26800000	31600000	1	1.18	16445
1866	Q13033|STRN3_HUMAN	6.38	182.22	6010000	6000000	7370000	6800000	1	1	1.23	1.13	6000000	7090000	1	1.18	87209
2807	Q9UKX7|NUP50_HUMAN	6.38	143.69	2190000	2150000	2660000	2500000	1	0.98	1.21	1.14	2170000	2580000	1	1.19	50144
878	P16401|H15_HUMAN	6.37	273.29	67700000	68100000	77800000	82500000	1	1.01	1.15	1.22	67900000	80100000	1	1.18	22580
227	O00468|AGRIN_HUMAN	6.36	358.36	22000000	22300000	19000000	18600000	1	1.02	0.86	0.84	22100000	18800000	1	0.85	217231
434	P12268|IMDH2_HUMAN	6.36	298.92	30900000	31000000	37000000	36000000	1	1	1.2	1.17	30900000	36500000	1	1.18	55805
1094	P26368|U2AF2_HUMAN	6.35	228.02	18400000	18400000	21900000	21600000	1	1	1.19	1.17	18400000	21700000	1	1.18	53501
1144	Q9ULU4|PKCB1_HUMAN	6.34	228.22	4690000	4650000	5560000	5460000	1	0.99	1.19	1.16	4670000	5510000	1	1.18	131692
3400	Q9HCD6|TANC2_HUMAN	6.34	157.01	883000	872000	1160000	1120000	1	0.99	1.31	1.27	878000	1140000	1	1.3	219647
748	P49321|NASP_HUMAN	6.33	266.06	8050000	8190000	9670000	9500000	1	1.02	1.2	1.18	8120000	9580000	1	1.18	85238
117	P07196|NFL_HUMAN	6.32	354.52	39300000	40500000	47200000	46900000	1	1.03	1.2	1.19	39900000	47100000	1	1.18	61517
57	P35241|RADI_HUMAN	6.32	346.78	59400000	59700000	50600000	50300000	1	1.01	0.85	0.85	59500000	50500000	1	0.85	68564
1831	A6NHQ2|FBLL1_HUMAN	6.32	222.2	5420000	5240000	6470000	6120000	1	0.97	1.19	1.13	5330000	6290000	1	1.18	34803
2750	P09486|SPRC_HUMAN	6.32	185.31	9080000	9000000	7640000	7680000	1	0.99	0.84	0.85	9040000	7660000	1	0.85	34632
855	Q13283|G3BP1_HUMAN	6.29	276.36	8010000	8120000	9770000	9250000	1	1.01	1.22	1.15	8070000	9510000	1	1.18	52164
1128	Q9Y570|PPME1_HUMAN	6.29	203.88	5070000	5170000	6000000	6070000	1	1.02	1.18	1.2	5120000	6040000	1	1.18	42315
1711	Q09161|NCBP1_HUMAN	6.28	186.76	3090000	3100000	3690000	3620000	1	1	1.19	1.17	3100000	3650000	1	1.18	91839
4505	Q14137|BOP1_HUMAN	6.26	101.02	1470000	1460000	1930000	1890000	1	1	1.31	1.29	1470000	1910000	1	1.3	83630
4015	Q9NPF4|OSGEP_HUMAN	6.25	103.84	1150000	1080000	1430000	1380000	1	0.94	1.24	1.2	1110000	1400000	1	1.26	36427
2469	Q05048|CSTF1_HUMAN	6.22	160.88	4470000	4370000	5480000	4940000	1	0.98	1.23	1.1	4420000	5210000	1	1.18	48358
139	O00571|DDX3X_HUMAN	6.21	340.19	14300000	14100000	17000000	16400000	1	0.99	1.19	1.15	14200000	16700000	1	1.18	73244
1298	P67809|YBOX1_HUMAN	6.19	288.41	10300000	11000000	12300000	12900000	1	1.07	1.19	1.24	10700000	12600000	1	1.18	35924
653	P48449|ERG7_HUMAN	6.19	276.35	7450000	7670000	8810000	8980000	1	1.03	1.18	1.21	7560000	8900000	1	1.18	83309
942	Q00169|PIPNA_HUMAN	6.19	239.92	16400000	15800000	14000000	13400000	1	0.96	0.85	0.82	16100000	13700000	1	0.85	31806
1844	P62266|RS23_HUMAN	6.19	188.75	13300000	13400000	16200000	15300000	1	1.01	1.21	1.15	13400000	15700000	1	1.18	15808
1383	Q7KZ85|SPT6H_HUMAN	6.18	245.89	3410000	3400000	4110000	3900000	1	1	1.21	1.14	3400000	4000000	1	1.18	199071
658	P11387|TOP1_HUMAN	6.18	225.85	22300000	22100000	26300000	25900000	1	0.99	1.18	1.16	22200000	26100000	1	1.18	90726
562	P55268|LAMB2_HUMAN	6.17	257.13	9850000	10100000	8360000	8590000	1	1.02	0.85	0.87	9970000	8470000	1	0.85	195980
2142	P15289|ARSA_HUMAN	6.17	165.32	6510000	6380000	5460000	5500000	1	0.98	0.84	0.84	6450000	5480000	1	0.85	53588
2909	Q92520|FAM3C_HUMAN	6.16	172.9	3680000	3680000	4340000	4310000	1	1	1.18	1.17	3680000	4330000	1	1.18	24680
1141	P46063|RECQ1_HUMAN	6.14	207.87	8190000	7930000	6930000	6780000	1	0.97	0.85	0.83	8060000	6860000	1	0.85	73457
3855	Q8WYP5|ELYS_HUMAN	6.14	145.06	1160000	1200000	1380000	1380000	1	1.03	1.2	1.2	1180000	1380000	1	1.18	252496
3339	Q13574|DGKZ_HUMAN	6.13	152.53	1480000	1490000	1710000	1770000	1	1.01	1.16	1.2	1480000	1740000	1	1.18	124128
260	P04264|K2C1_HUMAN	6.12	354.01	26400000	25800000	31300000	30000000	1	0.98	1.19	1.14	26100000	30700000	1	1.18	66039
3798	Q9NPJ3|ACO13_HUMAN	6.12	127.23	5100000	5180000	6230000	5860000	1	1.02	1.22	1.15	5140000	6040000	1	1.18	14960
2644	Q9UEE9|CFDP1_HUMAN	6.11	133.24	4770000	4720000	5850000	5780000	1	0.99	1.23	1.21	4750000	5820000	1	1.23	33593
3582	Q99490|AGAP2_HUMAN	6.09	175.17	835000	828000	1020000	932000	1	0.99	1.22	1.12	832000	977000	1	1.17	124673
1950	O60462|NRP2_HUMAN	6.09	173.44	3370000	3450000	4100000	4130000	1	1.02	1.22	1.23	3410000	4110000	1	1.21	104859
167	O75083|WDR1_HUMAN	6.08	359.33	88500000	88400000	75200000	75400000	1	1	0.85	0.85	88400000	75300000	1	0.85	66194
737	P50454|SERPH_HUMAN	6.07	282.62	35600000	36400000	42900000	41600000	1	1.02	1.21	1.17	36000000	42300000	1	1.17	46441
926	O95573|ACSL3_HUMAN	6.07	248.51	6230000	6100000	7400000	7070000	1	0.98	1.19	1.14	6170000	7240000	1	1.17	80420
106	P21333|FLNA_HUMAN	6.06	512.22	216000000	215000000	183000000	185000000	1	1	0.85	0.86	216000000	184000000	1	0.85	280737
4164	Q96AT1|K1143_HUMAN	6.06	96.65	623000	635000	825000	769000	1	1.02	1.32	1.23	629000	797000	1	1.27	17465
281	P27824|CALX_HUMAN	6.05	397.83	95300000	96200000	82300000	80900000	1	1.01	0.86	0.85	95700000	81600000	1	0.85	67568
2029	Q9NWB6|ARGL1_HUMAN	6.05	161.41	5580000	5780000	6780000	6780000	1	1.04	1.22	1.22	5680000	6780000	1	1.19	33216
867	P23786|CPT2_HUMAN	6.04	242.88	11000000	10800000	9480000	9080000	1	0.98	0.86	0.83	10900000	9280000	1	0.85	73777
2403	P00533|EGFR_HUMAN	6.04	161.22	1570000	1560000	1210000	1210000	1	0.99	0.77	0.77	1560000	1210000	1	0.77	134277
142	Q12860|CNTN1_HUMAN	6.02	377.65	65500000	64900000	55400000	55800000	1	0.99	0.85	0.85	65200000	55600000	1	0.85	113320
426	P51532|SMCA4_HUMAN	6.02	264.43	10600000	11200000	12400000	13200000	1	1.05	1.17	1.24	10900000	12800000	1	1.17	184644
1153	P80723|BASP1_HUMAN	6.01	307.85	44700000	44800000	38000000	38300000	1	1	0.85	0.86	44700000	38200000	1	0.85	22693
1365	Q9Y281|COF2_HUMAN	6	211.24	5870000	5900000	5000000	5040000	1	1	0.85	0.86	5890000	5020000	1	0.85	18737
3811	O14879|IFIT3_HUMAN	6	167.41	1070000	1050000	905000	909000	1	0.98	0.84	0.85	1060000	907000	1	0.85	55985
3196	P49207|RL34_HUMAN	5.99	153.8	7020000	7050000	8370000	8270000	1	1	1.19	1.18	7040000	8320000	1	1.18	13293
414	P36871|PGM1_HUMAN	5.98	279.07	35800000	35000000	30300000	30100000	1	0.98	0.85	0.84	35400000	30200000	1	0.85	61449
1231	P46060|RAGP1_HUMAN	5.98	239.78	7510000	7480000	8890000	8670000	1	1	1.18	1.16	7490000	8780000	1	1.17	63542
1693	P63000|RAC1_HUMAN	5.98	188.49	8600000	8520000	7440000	7160000	1	0.99	0.87	0.83	8560000	7300000	1	0.85	21450
2962	Q9Y6R1|S4A4_HUMAN	5.98	122.39	3150000	3110000	2320000	2320000	1	0.99	0.73	0.74	3130000	2320000	1	0.74	121460
955	P49841|GSK3B_HUMAN	5.97	266.09	9430000	9270000	11100000	10800000	1	0.98	1.18	1.15	9350000	11000000	1	1.17	46744
1367	Q765P7|MTSSL_HUMAN	5.97	232.93	4230000	4320000	3680000	3620000	1	1.02	0.87	0.86	4280000	3650000	1	0.85	79929
1729	O60306|AQR_HUMAN	5.97	198.32	2920000	2870000	3480000	3310000	1	0.98	1.19	1.13	2900000	3400000	1	1.17	171294
501	O60502|OGA_HUMAN	5.96	301.8	20600000	20800000	22600000	25800000	1	1.01	1.1	1.26	20700000	24200000	1	1.17	102915
1331	Q99497|PARK7_HUMAN	5.95	303.05	39600000	39800000	33800000	34000000	1	1.01	0.85	0.86	39700000	33900000	1	0.85	19891
1120	Q9Y2X3|NOP58_HUMAN	5.95	239.14	8370000	8570000	9980000	9860000	1	1.02	1.19	1.18	8470000	9920000	1	1.17	59578
2486	Q13586|STIM1_HUMAN	5.95	156.66	1650000	1700000	1390000	1380000	1	1.03	0.84	0.83	1680000	1380000	1	0.83	77423
2315	Q8TD22|SFXN5_HUMAN	5.94	142.93	5600000	5570000	4600000	4610000	1	0.99	0.82	0.82	5580000	4600000	1	0.82	37124
865	Q14498|RBM39_HUMAN	5.93	277.15	12200000	12100000	14400000	14100000	1	1	1.18	1.15	12200000	14200000	1	1.17	59380
1033	P23528|COF1_HUMAN	5.92	257.45	21300000	21300000	18500000	17900000	1	1	0.87	0.84	21300000	18200000	1	0.85	18502
894	P27635|RL10_HUMAN	5.92	255.44	29500000	29600000	34500000	34600000	1	1	1.17	1.17	29500000	34600000	1	1.17	24604
1961	P61020|RAB5B_HUMAN	5.92	200.53	2170000	2150000	2560000	2500000	1	0.99	1.18	1.15	2160000	2530000	1	1.17	23707
360	P78347|GTF2I_HUMAN	5.9	279.61	26300000	26400000	30700000	30900000	1	1	1.17	1.18	26300000	30800000	1	1.17	112416
2758	Q96IV0|NGLY1_HUMAN	5.9	138.66	3790000	3460000	4330000	4190000	1	0.91	1.14	1.11	3620000	4260000	1	1.18	74390
2616	O14656|TOR1A_HUMAN	5.88	143.48	2400000	2450000	3020000	2960000	1	1.02	1.26	1.23	2420000	2990000	1	1.23	37809
898	P29590|PML_HUMAN	5.85	227.54	3980000	4120000	4700000	4770000	1	1.03	1.18	1.2	4050000	4730000	1	1.17	97551
2248	Q9UI08|EVL_HUMAN	5.85	178.63	1910000	1990000	2300000	2270000	1	1.04	1.2	1.19	1950000	2280000	1	1.17	44620
1765	P54762|EPHB1_HUMAN	5.85	178.39	929000	933000	1140000	1120000	1	1	1.23	1.2	931000	1130000	1	1.21	109885
3216	P46013|KI67_HUMAN	5.83	143.51	361000	364000	471000	475000	1	1.01	1.31	1.32	362000	473000	1	1.31	358695
1934	P83916|CBX1_HUMAN	5.82	214.92	5590000	5520000	6570000	6410000	1	0.99	1.18	1.15	5560000	6490000	1	1.17	21418
4268	Q9BPX5|ARP5L_HUMAN	5.82	109.15	3710000	3410000	4640000	4090000	1	0.92	1.25	1.1	3560000	4370000	1	1.23	16941
1182	Q7Z7K6|CENPV_HUMAN	5.81	256.37	9760000	10600000	11600000	12300000	1	1.09	1.18	1.26	10200000	11900000	1	1.17	29946
597	Q86YR5|GPSM1_HUMAN	5.79	258.84	4030000	4040000	4660000	4770000	1	1	1.16	1.18	4030000	4710000	1	1.17	74510
1517	Q6ZVM7|TM1L2_HUMAN	5.79	214.4	2640000	2720000	2290000	2300000	1	1.03	0.87	0.87	2680000	2290000	1	0.86	55556
1932	P21964|COMT_HUMAN	5.78	206.54	10100000	9820000	8520000	8570000	1	0.97	0.84	0.85	9980000	8540000	1	0.86	30037
4009	Q7Z6M1|RABEK_HUMAN	5.78	110.19	1790000	1850000	1500000	1480000	1	1.03	0.84	0.83	1820000	1490000	1	0.82	40565
1296	Q9H336|CRLD1_HUMAN	5.77	224.49	5870000	5870000	4990000	5070000	1	1	0.85	0.86	5870000	5030000	1	0.86	56888
1957	P04062|GLCM_HUMAN	5.76	219.9	12000000	12200000	10300000	10500000	1	1.02	0.86	0.87	12100000	10400000	1	0.86	59716
4040	P60866|RS20_HUMAN	5.76	143.67	13600000	13900000	15900000	16200000	1	1.02	1.17	1.19	13800000	16000000	1	1.17	13373
1168	P41240|CSK_HUMAN	5.75	194.52	8490000	8590000	9950000	9970000	1	1.01	1.17	1.17	8540000	9960000	1	1.17	50704
2118	Q15293|RCN1_HUMAN	5.75	188.8	12200000	12800000	10600000	10800000	1	1.05	0.87	0.88	12500000	10700000	1	0.86	38890
2301	P78362|SRPK2_HUMAN	5.75	185.88	3230000	3240000	3770000	3780000	1	1	1.17	1.17	3230000	3770000	1	1.17	77527
2510	Q9H1E3|NUCKS_HUMAN	5.75	179.24	7030000	6930000	8290000	8000000	1	0.99	1.18	1.14	6980000	8140000	1	1.17	27296
3016	P37108|SRP14_HUMAN	5.74	182	9220000	9110000	10800000	10600000	1	0.99	1.17	1.15	9170000	10700000	1	1.17	14570
2754	Q13976|KGP1_HUMAN	5.74	160.52	1020000	1060000	884000	903000	1	1.04	0.86	0.88	1040000	894000	1	0.86	76364
3962	P49711|CTCF_HUMAN	5.74	100.81	1390000	1400000	1820000	1690000	1	1.01	1.31	1.21	1400000	1750000	1	1.26	82785
1718	Q9Y2H2|SAC2_HUMAN	5.73	174.08	2440000	2560000	2770000	3110000	1	1.05	1.13	1.27	2500000	2940000	1	1.18	128407
3575	Q96JJ7|TMX3_HUMAN	5.72	144	5770000	5920000	7010000	7160000	1	1.03	1.21	1.24	5850000	7080000	1	1.21	51872
264	P43243|MATR3_HUMAN	5.71	346.23	62300000	58400000	67000000	73700000	1	0.94	1.08	1.18	60400000	70400000	1	1.17	94623
2937	Q8N1F8|S11IP_HUMAN	5.7	147.6	743000	757000	610000	615000	1	1.02	0.82	0.83	750000	612000	1	0.82	121401
1202	P42166|LAP2A_HUMAN	5.68	287.03	9590000	9100000	11500000	10300000	1	0.95	1.19	1.08	9340000	10900000	1	1.17	75492
1893	Q6ZTA4|TRI67_HUMAN	5.67	218.2	2640000	2720000	3100000	3140000	1	1.03	1.17	1.19	2680000	3120000	1	1.16	83823
211	P22102|PUR2_HUMAN	5.66	338.37	44600000	44600000	52700000	51100000	1	1	1.18	1.15	44600000	51900000	1	1.16	107767
656	Q08209|PP2BA_HUMAN	5.66	251.19	11900000	12100000	13900000	14000000	1	1.01	1.17	1.17	12000000	14000000	1	1.16	58688
6579	P61960|UFM1_HUMAN	5.66	165.02	2090000	2100000	2460000	2420000	1	1	1.18	1.16	2100000	2440000	1	1.16	9118
2598	O43399|TPD54_HUMAN	5.66	155.17	5150000	5090000	5940000	6000000	1	0.99	1.15	1.16	5120000	5970000	1	1.16	22238
2797	O00712|NFIB_HUMAN	5.66	152.53	1970000	1870000	2240000	2230000	1	0.95	1.14	1.13	1920000	2230000	1	1.16	47442
5545	P17301|ITA2_HUMAN	5.66	140.56	446000	502000	764000	734000	1	1.12	1.71	1.65	474000	749000	1	1.58	129295
376	P98160|PGBM_HUMAN	5.65	301.67	16600000	16700000	14300000	14300000	1	1	0.86	0.86	16700000	14300000	1	0.86	468835
1630	Q16566|KCC4_HUMAN	5.62	202.99	2500000	2600000	2990000	2950000	1	1.04	1.2	1.18	2550000	2970000	1	1.16	51926
2308	Q9BWU0|NADAP_HUMAN	5.62	178.96	2130000	2090000	2480000	2430000	1	0.98	1.16	1.14	2110000	2450000	1	1.16	88814
770	Q96AC1|FERM2_HUMAN	5.61	269.27	15100000	15100000	13000000	12900000	1	1	0.86	0.86	15100000	13000000	1	0.86	77861
2007	P46779|RL28_HUMAN	5.61	221.8	24200000	24000000	27800000	28200000	1	0.99	1.15	1.17	24100000	28000000	1	1.16	15747
1218	Q6DN90|IQEC1_HUMAN	5.6	203.84	6300000	6410000	7370000	7420000	1	1.02	1.17	1.18	6360000	7400000	1	1.16	108314
2649	Q9UHQ4|BAP29_HUMAN	5.6	150.57	2490000	2600000	2250000	2070000	1	1.04	0.9	0.83	2540000	2160000	1	0.85	28320
478	P00338|LDHA_HUMAN	5.59	260.42	52400000	51000000	44800000	44000000	1	0.97	0.86	0.84	51700000	44400000	1	0.86	36689
2412	Q92541|RTF1_HUMAN	5.58	150.02	2780000	2880000	3370000	3200000	1	1.04	1.21	1.15	2830000	3290000	1	1.16	80314
73	P52272|HNRPM_HUMAN	5.57	366.13	91100000	91300000	105000000	107000000	1	1	1.15	1.18	91200000	106000000	1	1.16	77516
1072	Q13243|SRSF5_HUMAN	5.57	231.89	10300000	10300000	12100000	11900000	1	0.99	1.17	1.15	10300000	12000000	1	1.16	31264
4580	P48058|GRIA4_HUMAN	5.57	98.48	1170000	1080000	1480000	1430000	1	0.92	1.27	1.23	1130000	1460000	1	1.3	100871
2551	Q9NUJ1|ABHDA_HUMAN	5.55	188.99	7830000	8080000	6640000	7050000	1	1.03	0.85	0.9	7960000	6850000	1	0.86	33933
108	P17987|TCPA_HUMAN	5.54	336.04	41400000	42000000	48700000	48200000	1	1.02	1.18	1.17	41700000	48400000	1	1.16	60344
2829	Q12933|TRAF2_HUMAN	5.54	138.4	3860000	4000000	4570000	4700000	1	1.04	1.19	1.22	3930000	4640000	1	1.18	55859
2284	Q9BQI7|PSD2_HUMAN	5.53	162.59	1540000	1580000	1780000	1840000	1	1.03	1.16	1.2	1560000	1810000	1	1.16	84660
4980	Q15654|TRIP6_HUMAN	5.53	142.43	1440000	1430000	1210000	1260000	1	0.99	0.84	0.87	1440000	1240000	1	0.86	50288
511	Q9NQ66|PLCB1_HUMAN	5.52	260.57	9900000	9760000	11600000	11300000	1	0.99	1.17	1.14	9830000	11400000	1	1.16	138567
462	O94826|TOM70_HUMAN	5.51	258.8	20200000	19800000	23800000	22700000	1	0.98	1.18	1.12	20000000	23200000	1	1.16	67455
1417	Q10570|CPSF1_HUMAN	5.51	204.29	2050000	2050000	2370000	2390000	1	1	1.16	1.17	2050000	2380000	1	1.16	160883
136	Q00839|HNRPU_HUMAN	5.5	384.82	126000000	126000000	149000000	144000000	1	1	1.18	1.14	126000000	146000000	1	1.16	90585
594	P07686|HEXB_HUMAN	5.5	320.07	19900000	20100000	17200000	17200000	1	1.01	0.86	0.86	20000000	17200000	1	0.86	63111
2176	P11279|LAMP1_HUMAN	5.5	232.22	25400000	25500000	22000000	21900000	1	1	0.86	0.86	25500000	22000000	1	0.86	44882
2536	Q9ULJ7|ANR50_HUMAN	5.5	192.62	1280000	1340000	1500000	1540000	1	1.05	1.17	1.2	1310000	1520000	1	1.16	155858
1979	O60826|CCD22_HUMAN	5.5	164.64	8100000	7620000	9230000	9020000	1	0.94	1.14	1.11	7860000	9120000	1	1.16	70756
3976	Q13641|TPBG_HUMAN	5.5	142.65	2810000	2770000	2380000	2430000	1	0.98	0.85	0.86	2790000	2400000	1	0.86	46032
3452	Q92506|DHB8_HUMAN	5.5	120.84	2170000	2220000	1810000	1880000	1	1.02	0.83	0.87	2190000	1850000	1	0.84	26974
570	Q9ULH0|KDIS_HUMAN	5.48	241.2	10400000	10500000	12300000	12000000	1	1.01	1.18	1.15	10500000	12100000	1	1.16	196541
2939	Q5SRE5|NU188_HUMAN	5.48	167.8	2250000	2220000	2560000	2650000	1	0.99	1.13	1.17	2240000	2600000	1	1.16	196041
606	P52789|HXK2_HUMAN	5.47	288.4	5870000	5940000	6910000	6790000	1	1.01	1.18	1.16	5900000	6850000	1	1.16	102380
404	Q9UQ35|SRRM2_HUMAN	5.47	274.47	14100000	14100000	16300000	16400000	1	1.01	1.16	1.17	14100000	16300000	1	1.16	299616
1156	Q9BTV5|FSD1_HUMAN	5.47	237.83	9070000	9010000	10700000	10300000	1	0.99	1.18	1.14	9040000	10500000	1	1.16	55820
2271	Q9HD45|TM9S3_HUMAN	5.47	172.95	11300000	10800000	9540000	9510000	1	0.96	0.84	0.84	11100000	9530000	1	0.86	67888
2986	Q00587|BORG5_HUMAN	5.47	149.86	1210000	1200000	1060000	1020000	1	0.99	0.87	0.84	1210000	1040000	1	0.86	40295
3617	P63220|RS21_HUMAN	5.46	125.38	5710000	5990000	7600000	7250000	1	1.05	1.33	1.27	5850000	7430000	1	1.27	9111
1127	P62753|RS6_HUMAN	5.45	248.84	27200000	27600000	32200000	31400000	1	1.01	1.18	1.15	27400000	31800000	1	1.16	28681
2576	Q9UG63|ABCF2_HUMAN	5.45	170.81	1880000	1840000	2190000	2120000	1	0.98	1.17	1.13	1860000	2160000	1	1.16	71290
4066	O00115|DNS2A_HUMAN	5.45	148.81	2710000	2660000	2370000	2260000	1	0.98	0.87	0.83	2690000	2320000	1	0.86	39581
356	O75534|CSDE1_HUMAN	5.43	273.57	21900000	22000000	26000000	24900000	1	1	1.19	1.14	22000000	25500000	1	1.16	88885
934	Q6YP21|KAT3_HUMAN	5.43	266.26	8990000	9190000	10600000	10500000	1	1.02	1.18	1.17	9090000	10500000	1	1.16	51400
97	Q14980|NUMA1_HUMAN	5.42	412.66	49700000	50800000	58800000	57600000	1	1.02	1.18	1.16	50200000	58200000	1	1.16	238257
3200	O00483|NDUA4_HUMAN	5.42	115.88	2430000	2300000	1950000	1890000	1	0.95	0.8	0.78	2360000	1920000	1	0.81	9370
1550	P30043|BLVRB_HUMAN	5.41	214.94	7310000	7230000	6230000	6320000	1	0.99	0.85	0.86	7270000	6280000	1	0.86	22119
2624	Q8TCD5|NT5C_HUMAN	5.41	158.08	4710000	4700000	4020000	4100000	1	1	0.85	0.87	4700000	4060000	1	0.86	23383
2943	Q86UV5|UBP48_HUMAN	5.41	144.63	1540000	1560000	1830000	1870000	1	1.02	1.19	1.21	1550000	1850000	1	1.19	119032
373	Q8NFP9|NBEA_HUMAN	5.4	299.17	7480000	7730000	8810000	8820000	1	1.03	1.18	1.18	7600000	8810000	1	1.16	327821
2940	P30626|SORCN_HUMAN	5.4	184.19	6240000	6340000	5290000	5570000	1	1.02	0.85	0.89	6290000	5430000	1	0.86	21676
1544	P51665|PSMD7_HUMAN	5.38	269.69	22900000	23500000	27300000	26400000	1	1.02	1.19	1.15	23200000	26900000	1	1.16	37025
1958	Q9UBQ0|VPS29_HUMAN	5.38	231.94	8740000	8840000	7780000	7410000	1	1.01	0.89	0.85	8790000	7590000	1	0.86	20506
3001	P62854|RS26_HUMAN	5.38	180.06	11300000	11600000	13400000	13100000	1	1.03	1.19	1.16	11400000	13200000	1	1.16	13015
3364	Q96S55|WRIP1_HUMAN	5.38	119.41	1010000	1040000	1270000	1230000	1	1.02	1.25	1.22	1020000	1250000	1	1.22	72133
2270	Q86TG7|PEG10_HUMAN	5.37	146.25	3270000	3310000	3980000	4020000	1	1.01	1.22	1.23	3290000	4000000	1	1.22	80173
3147	P23435|CBLN1_HUMAN	5.37	118.35	17300000	17200000	14600000	14400000	1	0.99	0.85	0.83	17300000	14500000	1	0.84	21097
853	Q13310|PABP4_HUMAN	5.36	252.18	7870000	7880000	9290000	8950000	1	1	1.18	1.14	7880000	9120000	1	1.16	70783
1256	P23378|GCSP_HUMAN	5.36	214.84	7340000	7400000	8580000	8490000	1	1.01	1.17	1.16	7370000	8540000	1	1.16	112730
2764	Q8IVD9|NUDC3_HUMAN	5.36	186.62	2680000	2550000	3280000	2780000	1	0.95	1.22	1.04	2620000	3030000	1	1.16	40822
584	Q13618|CUL3_HUMAN	5.35	274.74	27500000	26200000	31700000	30400000	1	0.96	1.15	1.11	26800000	31100000	1	1.16	88930
2519	Q96AG4|LRC59_HUMAN	5.34	184.07	6600000	6680000	7680000	7690000	1	1.01	1.16	1.16	6640000	7690000	1	1.16	34930
1502	O75093|SLIT1_HUMAN	5.33	225.29	3310000	3350000	3860000	3850000	1	1.01	1.16	1.16	3330000	3850000	1	1.16	167925
266	Q9UHD8|SEPT9_HUMAN	5.32	316.7	36700000	35800000	42500000	41300000	1	0.97	1.16	1.13	36200000	41900000	1	1.16	65402
3972	O94868|FCSD2_HUMAN	5.32	118.78	688000	673000	811000	764000	1	0.98	1.18	1.11	681000	788000	1	1.16	84276
984	Q9H2P0|ADNP_HUMAN	5.31	249	7390000	7550000	8630000	8660000	1	1.02	1.17	1.17	7470000	8640000	1	1.16	123563
2929	Q9BZK7|TBL1R_HUMAN	5.31	186.77	2260000	2330000	2660000	2660000	1	1.03	1.18	1.17	2300000	2660000	1	1.16	55595
3204	P55290|CAD13_HUMAN	5.31	146.81	5270000	5400000	6420000	6230000	1	1.03	1.22	1.18	5330000	6330000	1	1.19	78287
3682	Q9NXF1|TEX10_HUMAN	5.31	142.99	1470000	1480000	1650000	1790000	1	1.01	1.12	1.21	1480000	1720000	1	1.16	105674
307	O60264|SMCA5_HUMAN	5.29	298.54	21300000	21000000	24900000	24100000	1	0.98	1.17	1.13	21200000	24500000	1	1.16	121905
384	O00567|NOP56_HUMAN	5.29	290.68	26600000	27200000	31400000	30800000	1	1.02	1.18	1.16	26900000	31100000	1	1.16	66050
2096	Q8TCJ2|STT3B_HUMAN	5.29	182.16	10400000	10300000	12300000	11600000	1	0.99	1.18	1.12	10300000	12000000	1	1.16	93674
147	Q01518|CAP1_HUMAN	5.28	347.25	44700000	45800000	37400000	40900000	1	1.03	0.84	0.92	45200000	39100000	1	0.87	51902
2487	O43464|HTRA2_HUMAN	5.28	175.5	2180000	2140000	2490000	2510000	1	0.98	1.14	1.15	2160000	2500000	1	1.16	48841
1962	P61604|CH10_HUMAN	5.27	277.4	21100000	21300000	24900000	24100000	1	1.01	1.18	1.14	21200000	24500000	1	1.16	10932
3722	Q05519|SRS11_HUMAN	5.27	127.59	2980000	3020000	3480000	3460000	1	1.02	1.17	1.16	3000000	3470000	1	1.16	53542
22	P68366|TBA4A_HUMAN	5.26	478.64	7560000	7810000	6580000	6730000	1	1.03	0.87	0.89	7690000	6650000	1	0.87	49924
267	P06744|G6PI_HUMAN	5.26	403.69	75700000	78200000	66200000	67000000	1	1.03	0.87	0.89	76900000	66600000	1	0.87	63147
1872	Q5VTR2|BRE1A_HUMAN	5.26	180.81	2680000	2760000	3110000	3190000	1	1.03	1.16	1.19	2720000	3150000	1	1.16	113662
118	P17844|DDX5_HUMAN	5.25	375.85	35900000	35600000	41900000	40700000	1	0.99	1.17	1.13	35700000	41300000	1	1.16	69148
3085	P0DN76|U2AF5_HUMAN	5.25	168.82	4750000	4910000	4180000	4190000	1	1.03	0.88	0.88	4830000	4180000	1	0.87	27872
347	P09960|LKHA4_HUMAN	5.24	289.56	16700000	16800000	14300000	14800000	1	1.01	0.86	0.88	16800000	14500000	1	0.87	69285
2125	O14745|NHRF1_HUMAN	5.24	213.98	5740000	5860000	5030000	5010000	1	1.02	0.88	0.87	5800000	5020000	1	0.87	38868
1647	Q04837|SSBP_HUMAN	5.23	239.28	12300000	12300000	14500000	14000000	1	1	1.17	1.14	12300000	14200000	1	1.15	17260
1310	Q9HCK4|ROBO2_HUMAN	5.23	195.91	2720000	2760000	3210000	3130000	1	1.01	1.18	1.15	2740000	3170000	1	1.15	151199
2936	P61758|PFD3_HUMAN	5.23	121.46	4790000	4710000	5720000	5630000	1	0.98	1.19	1.18	4750000	5680000	1	1.2	22658
192	Q8N568|DCLK2_HUMAN	5.21	313.65	27900000	27300000	23900000	23900000	1	0.98	0.86	0.86	27600000	23900000	1	0.87	83606
749	P51649|SSDH_HUMAN	5.21	290.08	18700000	14300000	12000000	15500000	1	0.76	0.64	0.83	16500000	13800000	1	0.84	57215
762	Q15417|CNN3_HUMAN	5.21	289.29	47200000	47900000	40700000	41700000	1	1.01	0.86	0.88	47500000	41200000	1	0.87	36414
590	P49915|GUAA_HUMAN	5.21	283.43	26000000	26200000	30200000	30000000	1	1.01	1.16	1.15	26100000	30100000	1	1.15	76716
1413	Q9BX40|LS14B_HUMAN	5.21	223.73	6120000	6320000	7230000	7130000	1	1.03	1.18	1.17	6220000	7180000	1	1.15	42071
1524	Q13442|HAP28_HUMAN	5.21	190.57	10500000	10900000	9250000	9310000	1	1.03	0.88	0.88	10700000	9280000	1	0.87	20630
391	O95819|M4K4_HUMAN	5.2	284.41	4030000	4070000	4730000	4620000	1	1.01	1.17	1.15	4050000	4680000	1	1.15	142101
827	P20336|RAB3A_HUMAN	5.2	267.48	11100000	11100000	13100000	12500000	1	1	1.18	1.13	11100000	12800000	1	1.15	24984
3506	P35219|CAH8_HUMAN	5.2	155.22	2730000	2780000	2320000	2460000	1	1.02	0.85	0.9	2760000	2390000	1	0.87	32973
517	P36578|RL4_HUMAN	5.19	299.63	72600000	72700000	84900000	82600000	1	1	1.17	1.14	72600000	83800000	1	1.15	47697
1116	Q02543|RL18A_HUMAN	5.19	236.17	26300000	27100000	30200000	31400000	1	1.03	1.15	1.2	26700000	30800000	1	1.15	20762
1602	P42285|SK2L2_HUMAN	5.19	188.44	5280000	5190000	6180000	5900000	1	0.98	1.17	1.12	5240000	6040000	1	1.15	117805
2738	Q7Z3C6|ATG9A_HUMAN	5.19	145.45	1380000	1390000	1690000	1560000	1	1.01	1.23	1.14	1380000	1620000	1	1.17	94447
2808	Q5VZL5|ZMYM4_HUMAN	5.19	140.25	1520000	1520000	1890000	1830000	1	1	1.24	1.2	1520000	1860000	1	1.22	172787
4099	Q9Y3B2|EXOS1_HUMAN	5.19	118.04	2490000	2410000	2880000	2840000	1	0.97	1.16	1.14	2450000	2860000	1	1.17	21452
4018	Q96GQ5|RUS1_HUMAN	5.19	99.98	592000	615000	791000	843000	1	1.04	1.34	1.42	603000	817000	1	1.35	51018
659	P27348|1433T_HUMAN	5.18	319.73	44100000	43600000	50200000	50900000	1	0.99	1.14	1.15	43800000	50600000	1	1.15	27764
4891	O43670|ZN207_HUMAN	5.18	120.01	1650000	1710000	1960000	2000000	1	1.04	1.18	1.21	1680000	1980000	1	1.18	50751
274	Q5TF21|SOGA3_HUMAN	5.17	331.4	16500000	16500000	19100000	19000000	1	1	1.15	1.15	16500000	19100000	1	1.15	103199
259	P80404|GABT_HUMAN	5.16	323.33	42700000	42700000	37700000	36400000	1	1	0.88	0.85	42700000	37000000	1	0.87	56439
780	Q6SZW1|SARM1_HUMAN	5.16	238.65	7910000	7870000	9240000	8960000	1	1	1.17	1.13	7890000	9100000	1	1.15	79388
2039	Q99707|METH_HUMAN	5.16	201.48	3880000	3760000	4490000	4310000	1	0.97	1.16	1.11	3820000	4400000	1	1.15	140527
4479	Q99848|EBP2_HUMAN	5.14	110.45	753000	772000	899000	888000	1	1.03	1.19	1.18	762000	893000	1	1.17	34852
159	Q9NQC3|RTN4_HUMAN	5.13	352.56	42600000	43000000	49300000	49400000	1	1.01	1.16	1.16	42800000	49300000	1	1.15	129931
1309	O14639|ABLM1_HUMAN	5.13	238.97	4140000	4220000	3650000	3610000	1	1.02	0.88	0.87	4180000	3630000	1	0.87	87688
1054	P11388|TOP2A_HUMAN	5.13	224.99	1970000	2100000	2590000	2660000	1	1.07	1.32	1.35	2030000	2620000	1	1.29	174384
1039	O60341|KDM1A_HUMAN	5.13	211.56	5500000	5400000	6400000	6170000	1	0.98	1.16	1.12	5450000	6280000	1	1.15	92903
324	P51610|HCFC1_HUMAN	5.12	282.53	18000000	17700000	20900000	20300000	1	0.99	1.16	1.13	17900000	20600000	1	1.15	208730
1178	Q15102|PA1B3_HUMAN	5.12	281.52	24300000	24700000	28600000	27900000	1	1.02	1.18	1.15	24500000	28200000	1	1.15	25734
975	P62424|RL7A_HUMAN	5.12	234.65	16800000	16500000	19800000	18700000	1	0.98	1.18	1.11	16700000	19200000	1	1.15	29996
1695	Q13438|OS9_HUMAN	5.12	217.21	3680000	3870000	4370000	4330000	1	1.05	1.19	1.18	3770000	4350000	1	1.15	75562
449	P63104|1433Z_HUMAN	5.09	350.03	57000000	57800000	66100000	66000000	1	1.01	1.16	1.16	57400000	66100000	1	1.15	27745
149	P18206|VINC_HUMAN	5.09	333.73	65600000	65000000	57000000	56400000	1	0.99	0.87	0.86	65300000	56700000	1	0.87	123799
646	P54578|UBP14_HUMAN	5.09	269.6	19400000	21600000	15300000	20200000	1	1.11	0.79	1.04	20500000	17800000	1	0.87	56069
1730	O60443|DFNA5_HUMAN	5.09	218.04	5560000	5520000	4860000	4760000	1	0.99	0.87	0.86	5540000	4810000	1	0.87	54555
1631	O43719|HTSF1_HUMAN	5.09	198.49	6880000	6820000	7900000	7880000	1	0.99	1.15	1.14	6850000	7890000	1	1.15	85853
380	P62195|PRS8_HUMAN	5.08	310.38	28000000	28100000	24400000	24300000	1	1.01	0.87	0.87	28100000	24400000	1	0.87	45626
1041	P05026|AT1B1_HUMAN	5.06	292.91	59900000	57600000	50700000	51400000	1	0.96	0.85	0.86	58700000	51000000	1	0.87	35061
459	P49748|ACADV_HUMAN	5.06	272.95	28100000	28600000	22900000	26300000	1	1.02	0.82	0.94	28300000	24600000	1	0.87	70390
1881	P84103|SRSF3_HUMAN	5.06	233.71	33000000	32400000	38400000	36800000	1	0.98	1.16	1.11	32700000	37600000	1	1.15	19330
1283	P15848|ARSB_HUMAN	5.06	201.2	8390000	8450000	7480000	7160000	1	1.01	0.89	0.85	8420000	7320000	1	0.87	59687
1462	Q9GZT9|EGLN1_HUMAN	5.05	189.6	7540000	7570000	8970000	8420000	1	1	1.19	1.12	7560000	8690000	1	1.15	46021
2170	P62805|H4_HUMAN	5.04	261.37	46000000	46600000	53200000	53200000	1	1.01	1.16	1.16	46300000	53200000	1	1.15	11367
4252	Q86UK7|ZN598_HUMAN	5.04	94.11	1750000	1740000	1310000	1290000	1	1	0.75	0.74	1750000	1300000	1	0.74	98637
826	P11171|41_HUMAN	5.03	228.97	4290000	4280000	4930000	4920000	1	1	1.15	1.15	4280000	4920000	1	1.15	97017
2185	P20290|BTF3_HUMAN	5.03	193.29	3120000	3400000	3740000	3750000	1	1.09	1.2	1.2	3260000	3740000	1	1.15	22168
2784	Q01780|EXOSX_HUMAN	5.03	147.76	597000	579000	690000	709000	1	0.97	1.16	1.19	588000	700000	1	1.19	100831
1663	P60763|RAC3_HUMAN	5.02	180.21	5660000	5530000	6620000	6250000	1	0.98	1.17	1.1	5600000	6430000	1	1.15	21379
3206	Q5EB52|MEST_HUMAN	5.02	128.87	2770000	2750000	3310000	3110000	1	0.99	1.2	1.13	2760000	3210000	1	1.17	38830
2841	Q9H773|DCTP1_HUMAN	5.01	190.99	1540000	1490000	1820000	1650000	1	0.97	1.18	1.08	1510000	1740000	1	1.15	18681
2464	Q8IV38|ANKY2_HUMAN	5.01	178.91	3980000	3760000	4660000	4230000	1	0.95	1.17	1.06	3870000	4450000	1	1.15	49299
1038	Q9HCJ6|VAT1L_HUMAN	5	261.23	13300000	13500000	11800000	11500000	1	1.02	0.89	0.86	13400000	11700000	1	0.87	45899
467	P54886|P5CS_HUMAN	5	247.05	10600000	10600000	12200000	12100000	1	1	1.16	1.14	10600000	12200000	1	1.15	87302
1284	Q8IYD1|ERF3B_HUMAN	4.99	249.47	4960000	4870000	5780000	5520000	1	0.98	1.16	1.11	4920000	5650000	1	1.15	68883
714	O15294|OGT1_HUMAN	4.99	238.3	10500000	11900000	8050000	11400000	1	1.12	0.76	1.08	11200000	9740000	1	0.87	116924
3114	P51606|RENBP_HUMAN	4.99	118.67	3350000	3410000	2760000	2810000	1	1.02	0.82	0.84	3380000	2790000	1	0.83	48831
2463	P11169|GTR3_HUMAN	4.98	168.51	2870000	2860000	3340000	3250000	1	1	1.16	1.13	2870000	3300000	1	1.15	53924
3503	P51674|GPM6A_HUMAN	4.98	128.87	3930000	3940000	3370000	3380000	1	1	0.86	0.86	3930000	3380000	1	0.86	31210
3609	Q8TF44|C2C4C_HUMAN	4.98	118.74	450000	472000	564000	563000	1	1.05	1.25	1.25	461000	564000	1	1.22	44576
4007	P13984|T2FB_HUMAN	4.98	116.24	2080000	2000000	2450000	2290000	1	0.96	1.18	1.1	2040000	2370000	1	1.16	28380
2634	P57087|JAM2_HUMAN	4.97	154.85	4340000	4230000	3720000	3580000	1	0.97	0.86	0.82	4280000	3650000	1	0.85	33207
3595	Q9NZ09|UBAP1_HUMAN	4.97	136.38	1640000	1410000	1920000	1610000	1	0.86	1.17	0.98	1530000	1760000	1	1.16	55084
1092	Q9BZF1|OSBL8_HUMAN	4.96	233.31	9900000	10300000	11300000	11900000	1	1.04	1.14	1.2	10100000	11600000	1	1.15	101196
1476	O43765|SGTA_HUMAN	4.96	199.97	8390000	7980000	9740000	9050000	1	0.95	1.16	1.08	8180000	9390000	1	1.15	34063
3814	Q9Y3T9|NOC2L_HUMAN	4.96	112.47	842000	844000	1120000	975000	1	1	1.33	1.16	843000	1050000	1	1.24	84919
872	Q96CX2|KCD12_HUMAN	4.94	288.79	11600000	11800000	10100000	10300000	1	1.02	0.87	0.88	11700000	10200000	1	0.87	35701
2137	P61106|RAB14_HUMAN	4.94	237.89	9230000	10700000	10700000	12200000	1	1.16	1.16	1.32	9980000	11500000	1	1.15	23897
2951	Q08174|PCDH1_HUMAN	4.94	134.11	1250000	1230000	1510000	1430000	1	0.99	1.21	1.14	1240000	1470000	1	1.19	114743
121	Q86UP2|KTN1_HUMAN	4.93	334.25	46500000	47300000	40600000	41100000	1	1.02	0.87	0.88	46900000	40900000	1	0.87	156275
386	Q7L014|DDX46_HUMAN	4.93	268	17100000	17200000	19900000	19600000	1	1.01	1.16	1.14	17200000	19700000	1	1.15	117362
1922	Q9NTZ6|RBM12_HUMAN	4.93	187.66	6370000	6510000	7390000	7390000	1	1.02	1.16	1.16	6440000	7390000	1	1.15	97396
76	Q15233|NONO_HUMAN	4.92	366.56	38400000	38900000	44500000	44200000	1	1.01	1.16	1.15	38600000	44300000	1	1.15	54232
2244	Q96TC7|RMD3_HUMAN	4.92	172.7	2750000	2720000	2390000	2380000	1	0.99	0.87	0.87	2730000	2380000	1	0.87	52118
1704	P21912|SDHB_HUMAN	4.92	166.54	6870000	6800000	8050000	7730000	1	0.99	1.17	1.13	6840000	7890000	1	1.15	31630
2085	P05937|CALB1_HUMAN	4.92	159.74	4330000	4640000	3620000	4020000	1	1.07	0.84	0.93	4480000	3820000	1	0.85	30025
1633	Q9Y2S2|CRYL1_HUMAN	4.91	198.2	6010000	6130000	5060000	5530000	1	1.02	0.84	0.92	6070000	5290000	1	0.87	35419
3522	P07311|ACYP1_HUMAN	4.91	141.77	8730000	8460000	10200000	9510000	1	0.97	1.17	1.09	8600000	9860000	1	1.15	11261
2581	P34903|GBRA3_HUMAN	4.91	131.47	1210000	1200000	1550000	1530000	1	0.99	1.28	1.27	1210000	1540000	1	1.27	55165
94	P29401|TKT_HUMAN	4.9	410.05	175000000	174000000	152000000	153000000	1	1	0.87	0.87	175000000	152000000	1	0.87	67878
1745	Q6XQN6|PNCB_HUMAN	4.9	215.98	4530000	4510000	3810000	4070000	1	0.99	0.84	0.9	4520000	3940000	1	0.87	57578
3629	P62318|SMD3_HUMAN	4.9	148.47	8390000	8520000	9750000	9640000	1	1.01	1.16	1.15	8450000	9690000	1	1.15	13916
707	P23396|RS3_HUMAN	4.89	290.15	59200000	58000000	68200000	66200000	1	0.98	1.15	1.12	58600000	67200000	1	1.15	26688
607	Q8WWM7|ATX2L_HUMAN	4.89	276.64	10100000	10200000	11700000	11600000	1	1.01	1.15	1.15	10200000	11700000	1	1.15	113374
490	Q9P2K5|MYEF2_HUMAN	4.89	259.01	33300000	32900000	38600000	37200000	1	0.99	1.16	1.12	33100000	37900000	1	1.15	64122
2313	Q3SY69|AL1L2_HUMAN	4.89	184.15	1740000	1720000	2070000	2050000	1	0.99	1.19	1.17	1730000	2060000	1	1.19	101746
2129	Q01130|SRSF2_HUMAN	4.89	169.19	3550000	3540000	4100000	4030000	1	1	1.16	1.14	3540000	4060000	1	1.15	25476
3904	Q7L592|NDUF7_HUMAN	4.89	124.01	1170000	1160000	1440000	1310000	1	0.99	1.23	1.12	1170000	1370000	1	1.18	49238
1889	Q13162|PRDX4_HUMAN	4.87	206.5	6550000	6650000	7380000	7750000	1	1.02	1.13	1.18	6600000	7570000	1	1.15	30540
2084	Q9NZ01|TECR_HUMAN	4.87	151.72	8690000	8600000	7280000	7110000	1	0.99	0.84	0.82	8640000	7190000	1	0.83	36034
959	Q9NZ32|ARP10_HUMAN	4.86	235.41	9290000	9230000	10800000	10400000	1	0.99	1.17	1.12	9260000	10600000	1	1.15	46307
1438	Q10471|GALT2_HUMAN	4.86	227.97	7180000	7200000	8480000	7980000	1	1	1.18	1.11	7190000	8230000	1	1.15	64733
4275	Q96JM2|ZN462_HUMAN	4.85	154.37	1220000	1270000	1450000	1410000	1	1.04	1.18	1.15	1250000	1430000	1	1.15	284686
2969	Q96AY4|TTC28_HUMAN	4.85	141.84	2080000	2070000	2600000	2550000	1	1	1.25	1.23	2080000	2570000	1	1.24	270882
3383	O14924|RGS12_HUMAN	4.85	136.47	776000	715000	972000	801000	1	0.92	1.25	1.03	746000	886000	1	1.19	156357
2237	Q9NYI0|PSD3_HUMAN	4.84	153.88	8720000	8560000	10300000	9980000	1	0.98	1.18	1.14	8640000	10200000	1	1.17	116033
4001	O00469|PLOD2_HUMAN	4.84	109.9	607000	645000	766000	759000	1	1.06	1.26	1.25	626000	763000	1	1.22	84686
2127	Q07020|RL18_HUMAN	4.83	289.11	18500000	18900000	21700000	21200000	1	1.03	1.17	1.15	18700000	21400000	1	1.14	21634
1646	Q00688|FKBP3_HUMAN	4.83	248.05	28800000	29300000	33600000	32900000	1	1.02	1.17	1.14	29100000	33300000	1	1.15	25177
715	Q06787|FMR1_HUMAN	4.83	227.2	10200000	10300000	11900000	11600000	1	1.01	1.16	1.14	10200000	11700000	1	1.15	71175
3172	Q02410|APBA1_HUMAN	4.83	144.77	359000	375000	449000	428000	1	1.04	1.25	1.19	367000	438000	1	1.19	92865
3734	Q9P0K1|ADA22_HUMAN	4.83	132.56	1150000	1160000	967000	982000	1	1	0.84	0.85	1160000	975000	1	0.84	100433
102	O60282|KIF5C_HUMAN	4.82	391.46	53800000	54100000	61300000	62200000	1	1.01	1.14	1.16	53900000	61800000	1	1.14	109495
1573	Q9NWY4|HPF1_HUMAN	4.82	203	2830000	3010000	3400000	3350000	1	1.06	1.2	1.18	2920000	3380000	1	1.15	39436
1523	Q9P260|K1468_HUMAN	4.82	185.43	5270000	4680000	6150000	5410000	1	0.89	1.17	1.03	4970000	5780000	1	1.16	134630
3183	Q68E01|INT3_HUMAN	4.82	153.63	1340000	1340000	1530000	1540000	1	1	1.14	1.15	1340000	1530000	1	1.14	118070
393	Q9BXJ9|NAA15_HUMAN	4.81	265	16500000	16500000	18900000	18900000	1	1	1.15	1.15	16500000	18900000	1	1.14	101272
1080	Q02246|CNTN2_HUMAN	4.81	218.79	6580000	6490000	7560000	7390000	1	0.99	1.15	1.12	6530000	7480000	1	1.14	113393
3807	P53985|MOT1_HUMAN	4.81	152.99	3650000	3790000	3170000	3330000	1	1.04	0.87	0.91	3720000	3250000	1	0.87	53944
4097	Q5J8M3|EMC4_HUMAN	4.8	127.99	3770000	3690000	4420000	4120000	1	0.98	1.17	1.09	3730000	4270000	1	1.14	20087
1189	Q6T4P5|PLPR3_HUMAN	4.79	197.07	3760000	3680000	4430000	4080000	1	0.98	1.18	1.09	3720000	4260000	1	1.14	76037
1774	O75152|ZC11A_HUMAN	4.79	170.12	1710000	1640000	2080000	1950000	1	0.96	1.22	1.14	1670000	2010000	1	1.2	89131
3733	Q9UBU8|MO4L1_HUMAN	4.79	133.7	1100000	1270000	1280000	1430000	1	1.15	1.16	1.3	1180000	1350000	1	1.14	41474
952	Q15942|ZYX_HUMAN	4.78	269.83	8180000	8050000	7070000	7120000	1	0.99	0.86	0.87	8120000	7090000	1	0.87	61277
1997	P53582|MAP11_HUMAN	4.78	221.95	6610000	6680000	7660000	7530000	1	1.01	1.16	1.14	6640000	7600000	1	1.14	43215
1548	P83731|RL24_HUMAN	4.78	208.9	38300000	37600000	44600000	42100000	1	0.98	1.17	1.1	37900000	43400000	1	1.14	17779
1358	Q9UQM7|KCC2A_HUMAN	4.77	232.31	1780000	1840000	2130000	2130000	1	1.03	1.2	1.2	1810000	2130000	1	1.18	54088
2840	O75822|EIF3J_HUMAN	4.77	218.22	8230000	8360000	9800000	9170000	1	1.02	1.19	1.12	8290000	9490000	1	1.14	29062
1513	P55010|IF5_HUMAN	4.77	205.28	22300000	21700000	25400000	25000000	1	0.97	1.14	1.12	22000000	25200000	1	1.14	49223
1668	P57772|SELB_HUMAN	4.77	201.29	3710000	3640000	4250000	4150000	1	0.98	1.15	1.12	3670000	4200000	1	1.14	65305
1134	Q13123|RED_HUMAN	4.76	223.33	7730000	7690000	9000000	8640000	1	0.99	1.16	1.12	7710000	8820000	1	1.14	65602
4070	Q13627|DYR1A_HUMAN	4.76	113.97	3340000	3210000	4050000	3700000	1	0.96	1.21	1.11	3270000	3870000	1	1.18	85584
1843	Q53GG5|PDLI3_HUMAN	4.75	215.17	5590000	5830000	4970000	5020000	1	1.04	0.89	0.9	5710000	4990000	1	0.87	39232
2099	Q05209|PTN12_HUMAN	4.75	176.13	3320000	3220000	3770000	3710000	1	0.97	1.14	1.12	3270000	3740000	1	1.14	88106
473	P55265|DSRAD_HUMAN	4.74	290.22	17800000	17800000	20300000	20300000	1	1	1.14	1.14	17800000	20300000	1	1.14	136066
1100	Q14444|CAPR1_HUMAN	4.74	209.02	19100000	19100000	21900000	21600000	1	1	1.15	1.14	19100000	21800000	1	1.14	78366
1737	Q14576|ELAV3_HUMAN	4.74	208.83	3590000	3620000	4140000	4090000	1	1.01	1.16	1.14	3600000	4120000	1	1.14	39547
1305	O00148|DX39A_HUMAN	4.73	235.55	2860000	2680000	4170000	3810000	1	0.94	1.46	1.33	2770000	3990000	1	1.44	49130
1445	O14994|SYN3_HUMAN	4.73	206.92	1930000	2020000	2190000	2330000	1	1.04	1.13	1.2	1980000	2260000	1	1.14	63303
1907	O75976|CBPD_HUMAN	4.73	197.74	4450000	4370000	5090000	4980000	1	0.98	1.15	1.12	4410000	5040000	1	1.14	152931
65	P78371|TCPB_HUMAN	4.72	358.9	55900000	56000000	65200000	62700000	1	1	1.17	1.12	56000000	63900000	1	1.14	57488
1301	Q9NQR4|NIT2_HUMAN	4.72	235.16	7110000	7230000	8220000	8160000	1	1.02	1.16	1.15	7170000	8190000	1	1.14	30608
2355	Q6ZVF9|GRIN3_HUMAN	4.72	164.39	2120000	2130000	2440000	2420000	1	1.01	1.15	1.14	2120000	2430000	1	1.14	82439
2990	Q9NZ56|FMN2_HUMAN	4.71	178.31	1410000	1440000	1280000	1220000	1	1.02	0.91	0.86	1420000	1250000	1	0.88	180105
2402	P23229|ITA6_HUMAN	4.71	176.23	2790000	2790000	3260000	3110000	1	1	1.17	1.12	2790000	3190000	1	1.14	126605
2381	O43264|ZW10_HUMAN	4.7	177.62	3330000	3380000	3800000	3860000	1	1.01	1.14	1.16	3360000	3830000	1	1.14	88830
4154	Q9H3U1|UN45A_HUMAN	4.7	121.07	647000	651000	799000	785000	1	1.01	1.24	1.21	649000	792000	1	1.22	103077
2514	Q16143|SYUB_HUMAN	4.69	274.99	12900000	13600000	14600000	15600000	1	1.05	1.13	1.21	13200000	15100000	1	1.14	14288
1470	Q9BXM9|FSD1L_HUMAN	4.68	208.99	14200000	13900000	16300000	15700000	1	0.98	1.15	1.11	14000000	16000000	1	1.14	59578
1680	O14576|DC1I1_HUMAN	4.68	200.67	2240000	2290000	2620000	2550000	1	1.02	1.17	1.14	2260000	2580000	1	1.14	72955
1166	P49916|DNLI3_HUMAN	4.68	184.53	6710000	6660000	7670000	7650000	1	0.99	1.14	1.14	6680000	7660000	1	1.15	112907
2182	P18084|ITB5_HUMAN	4.67	182.8	3630000	3630000	3130000	3230000	1	1	0.86	0.89	3630000	3180000	1	0.88	88054
2782	Q6N022|TEN4_HUMAN	4.67	180.51	788000	801000	898000	922000	1	1.02	1.14	1.17	794000	910000	1	1.15	307956
4072	Q8WVC0|LEO1_HUMAN	4.67	117.1	563000	586000	717000	672000	1	1.04	1.27	1.19	574000	695000	1	1.21	75404
620	P52888|THOP1_HUMAN	4.66	246.03	21800000	22600000	17200000	20800000	1	1.03	0.79	0.95	22200000	19000000	1	0.85	78840
563	Q14839|CHD4_HUMAN	4.65	281.89	13200000	12900000	15200000	14700000	1	0.97	1.15	1.12	13000000	15000000	1	1.15	218003
1184	Q13347|EIF3I_HUMAN	4.65	232	11700000	11900000	13500000	13300000	1	1.02	1.16	1.14	11800000	13400000	1	1.14	36502
2378	Q13049|TRI32_HUMAN	4.65	175.14	1020000	1050000	1160000	1190000	1	1.03	1.15	1.17	1030000	1180000	1	1.14	71989
2902	Q69YN4|VIR_HUMAN	4.65	153.84	2420000	2330000	2920000	2860000	1	0.97	1.21	1.18	2380000	2890000	1	1.22	202023
4508	Q14781|CBX2_HUMAN	4.65	106.05	39700	38200	64400	65400	1	0.96	1.62	1.65	39000	64900	1	1.67	56081
6984	Q9BT23|LIMD2_HUMAN	4.65	92.04	846000	852000	1340000	1280000	1	1.01	1.58	1.52	849000	1310000	1	1.54	14070
2031	O00442|RTCA_HUMAN	4.64	175.53	4450000	4740000	5130000	5340000	1	1.06	1.15	1.2	4590000	5240000	1	1.14	39337
3735	O14775|GBB5_HUMAN	4.64	131.4	1560000	1620000	1360000	1400000	1	1.04	0.87	0.9	1590000	1380000	1	0.87	43566
3040	O60936|NOL3_HUMAN	4.63	225.97	3940000	3940000	3450000	3460000	1	1	0.88	0.88	3940000	3460000	1	0.88	22629
2751	Q9NYR9|KBRS2_HUMAN	4.63	141.45	2790000	2710000	3300000	3090000	1	0.97	1.18	1.11	2750000	3190000	1	1.16	21508
2637	Q53FA7|QORX_HUMAN	4.62	156.64	7260000	7550000	6440000	6560000	1	1.04	0.89	0.9	7410000	6500000	1	0.88	35536
3659	Q9H313|TTYH1_HUMAN	4.61	171.34	4290000	4130000	3810000	3580000	1	0.96	0.89	0.83	4210000	3700000	1	0.88	49051
114	P35579|MYH9_HUMAN	4.6	438.81	75100000	74100000	82400000	87700000	1	0.99	1.1	1.17	74600000	85000000	1	1.14	226530
1180	Q14738|2A5D_HUMAN	4.6	205.86	7100000	6990000	8000000	8060000	1	0.98	1.13	1.14	7050000	8030000	1	1.14	69992
3057	Q9P1U1|ARP3B_HUMAN	4.6	148.33	777000	756000	999000	937000	1	0.97	1.29	1.21	767000	968000	1	1.26	47608
568	Q13332|PTPRS_HUMAN	4.59	258.83	2190000	2250000	2570000	2500000	1	1.02	1.17	1.14	2220000	2530000	1	1.14	217039
2335	O75312|ZPR1_HUMAN	4.59	147.99	3960000	3900000	4630000	4510000	1	0.99	1.17	1.14	3930000	4570000	1	1.16	50925
3237	Q96QG7|MTMR9_HUMAN	4.59	128.68	2360000	2330000	2960000	2870000	1	0.99	1.25	1.21	2340000	2910000	1	1.24	63462
292	Q9H0B6|KLC2_HUMAN	4.58	286.91	6730000	6950000	7870000	7710000	1	1.03	1.17	1.15	6840000	7790000	1	1.14	68935
657	Q15424|SAFB1_HUMAN	4.58	264.04	5270000	5270000	6160000	5850000	1	1	1.17	1.11	5270000	6000000	1	1.14	102642
2891	Q9BQG2|NUD12_HUMAN	4.58	143.51	4070000	4040000	3550000	3570000	1	0.99	0.87	0.88	4060000	3560000	1	0.88	52076
3860	Q6ZSR9|YJ005_HUMAN	4.58	118.86	1550000	1410000	1300000	1250000	1	0.91	0.84	0.81	1480000	1280000	1	0.86	37976
3663	P02795|MT2_HUMAN	4.58	114.77	1120000	1090000	727000	610000	1	0.97	0.65	0.54	1110000	668000	1	0.6	6042
795	O43488|ARK72_HUMAN	4.57	278.81	15200000	15200000	13000000	13700000	1	1	0.86	0.9	15200000	13400000	1	0.88	39589
3008	Q5RKV6|EXOS6_HUMAN	4.57	150.67	3260000	3160000	3730000	3680000	1	0.97	1.14	1.13	3210000	3700000	1	1.15	28235
95	P40939|ECHA_HUMAN	4.56	410.49	77200000	77800000	68400000	67800000	1	1.01	0.89	0.88	77500000	68100000	1	0.88	83000
2549	P49755|TMEDA_HUMAN	4.56	209.44	19600000	20400000	15900000	19200000	1	1.04	0.81	0.98	20000000	17600000	1	0.88	24976
940	P85037|FOXK1_HUMAN	4.56	206.36	4870000	4940000	5590000	5580000	1	1.01	1.15	1.15	4910000	5580000	1	1.14	75457
3871	Q9BZE4|NOG1_HUMAN	4.56	100.92	2800000	2820000	3550000	3430000	1	1.01	1.27	1.23	2810000	3490000	1	1.24	73965
243	P21796|VDAC1_HUMAN	4.55	392.91	95800000	94100000	84200000	82700000	1	0.98	0.88	0.86	95000000	83400000	1	0.88	30773
3245	Q8N129|CNPY4_HUMAN	4.55	168.8	2320000	2280000	2020000	2020000	1	0.98	0.87	0.87	2300000	2020000	1	0.88	28310
5197	Q8TB73|NDNF_HUMAN	4.55	82.55	590000	543000	1020000	924000	1	0.92	1.73	1.57	567000	971000	1	1.71	64673
744	Q4G0N4|NAKD2_HUMAN	4.54	293.01	9830000	9980000	8640000	8770000	1	1.02	0.88	0.89	9910000	8700000	1	0.88	49433
1037	P23468|PTPRD_HUMAN	4.54	222.46	3560000	3390000	4140000	3860000	1	0.95	1.16	1.08	3470000	4000000	1	1.15	214758
1324	Q99962|SH3G2_HUMAN	4.54	209.21	11000000	10600000	9500000	9520000	1	0.96	0.86	0.86	10800000	9510000	1	0.88	39962
6950	P06454|PTMA_HUMAN	4.54	183.04	7910000	8060000	9080000	9090000	1	1.02	1.15	1.15	7980000	9090000	1	1.14	12203
2947	O43272|PROD_HUMAN	4.54	149.33	1090000	1070000	956000	936000	1	0.98	0.88	0.86	1080000	946000	1	0.87	68002
3086	O00566|MPP10_HUMAN	4.54	131.66	1330000	1360000	1640000	1620000	1	1.02	1.23	1.21	1350000	1630000	1	1.21	78864
4188	Q8WXS3|BAALC_HUMAN	4.54	86.87	2490000	2440000	1980000	2020000	1	0.98	0.8	0.81	2470000	2000000	1	0.81	19224
445	P78344|IF4G2_HUMAN	4.53	271.97	16200000	16300000	18800000	18200000	1	1	1.16	1.12	16300000	18500000	1	1.14	102362
420	O94906|PRP6_HUMAN	4.53	263.66	18900000	19500000	21700000	21900000	1	1.04	1.15	1.16	19200000	21800000	1	1.14	106925
1391	Q9H254|SPTN4_HUMAN	4.53	240.45	2620000	2590000	2200000	2380000	1	0.99	0.84	0.91	2600000	2290000	1	0.88	288984
1710	Q04828|AK1C1_HUMAN	4.53	183.01	937000	991000	1090000	1100000	1	1.06	1.17	1.18	964000	1100000	1	1.14	36788
2697	P46087|NOP2_HUMAN	4.53	143.72	1310000	1370000	1550000	1580000	1	1.05	1.18	1.21	1340000	1560000	1	1.17	89302
3461	Q8IU85|KCC1D_HUMAN	4.53	127.81	3430000	3390000	4150000	4000000	1	0.99	1.21	1.17	3410000	4070000	1	1.2	42914
4065	Q96FE5|LIGO1_HUMAN	4.53	110.92	1640000	1650000	1970000	1990000	1	1	1.2	1.21	1650000	1980000	1	1.2	69876
370	P19174|PLCG1_HUMAN	4.52	273.97	14300000	14600000	16500000	16400000	1	1.02	1.16	1.15	14400000	16400000	1	1.14	148532
2789	O60885|BRD4_HUMAN	4.52	146.64	1850000	1920000	2270000	2290000	1	1.04	1.23	1.24	1880000	2280000	1	1.21	152218
812	O14776|TCRG1_HUMAN	4.51	232.57	18900000	18800000	20600000	22300000	1	0.99	1.09	1.18	18900000	21400000	1	1.14	123901
1011	Q9Y5F9|PCDGI_HUMAN	4.5	202.97	3960000	3830000	4620000	4230000	1	0.97	1.17	1.07	3890000	4430000	1	1.14	101043
1006	Q06830|PRDX1_HUMAN	4.49	287.79	89000000	91100000	79100000	79400000	1	1.02	0.89	0.89	90000000	79200000	1	0.88	22110
1181	Q13330|MTA1_HUMAN	4.49	193.9	5000000	5130000	5880000	5710000	1	1.03	1.18	1.14	5070000	5790000	1	1.14	80786
3817	P18858|DNLI1_HUMAN	4.49	152.22	1140000	1180000	1320000	1320000	1	1.04	1.16	1.16	1160000	1320000	1	1.14	101736
2975	P62263|RS14_HUMAN	4.48	236.53	16900000	17000000	19700000	18800000	1	1	1.17	1.11	16900000	19200000	1	1.14	16273
6132	P21926|CD9_HUMAN	4.48	99.82	6800000	6410000	4660000	4610000	1	0.94	0.69	0.68	6600000	4640000	1	0.7	25416
1313	Q13242|SRSF9_HUMAN	4.47	230.64	5590000	5670000	6500000	6290000	1	1.01	1.16	1.12	5630000	6390000	1	1.14	25542
3071	O14647|CHD2_HUMAN	4.47	192.42	1290000	1300000	1530000	1420000	1	1.01	1.18	1.1	1300000	1470000	1	1.14	211342
3674	O95864|FADS2_HUMAN	4.47	136.87	1280000	1280000	1510000	1470000	1	1	1.18	1.15	1280000	1490000	1	1.17	52259
3993	Q9NQT4|EXOS5_HUMAN	4.47	104.81	1880000	1880000	2300000	2170000	1	1	1.22	1.15	1880000	2230000	1	1.19	25249
7	P04406|G3P_HUMAN	4.45	454.84	539000000	535000000	462000000	483000000	1	0.99	0.86	0.9	537000000	473000000	1	0.88	36053
1401	Q8TDZ2|MICA1_HUMAN	4.45	172.75	3590000	3660000	4270000	4180000	1	1.02	1.19	1.17	3630000	4220000	1	1.17	117875
1422	Q99729|ROAA_HUMAN	4.43	252.02	20300000	22900000	24200000	24700000	1	1.13	1.2	1.22	21600000	24500000	1	1.14	36225
1374	O75494|SRS10_HUMAN	4.43	243.64	8030000	7890000	9380000	8690000	1	0.98	1.17	1.08	7960000	9040000	1	1.14	31301
4788	Q70CQ4|UBP31_HUMAN	4.43	131.73	479000	496000	401000	431000	1	1.04	0.84	0.9	488000	416000	1	0.85	146651
251	P61978|HNRPK_HUMAN	4.42	374.27	88400000	88000000	102000000	97900000	1	1	1.16	1.11	88200000	100000000	1	1.14	50976
677	P28288|ABCD3_HUMAN	4.42	247.67	16800000	16600000	14800000	14600000	1	0.99	0.88	0.87	16700000	14700000	1	0.88	75476
2026	Q5JTV8|TOIP1_HUMAN	4.42	160.27	2170000	2300000	1850000	1980000	1	1.06	0.85	0.91	2240000	1910000	1	0.86	66248
3491	P29083|T2EA_HUMAN	4.42	111.78	2100000	2080000	2620000	2430000	1	0.99	1.24	1.16	2090000	2530000	1	1.21	49452
2272	Q14161|GIT2_HUMAN	4.41	147.29	1590000	1590000	1340000	1310000	1	1	0.84	0.82	1590000	1320000	1	0.83	84543
2135	P49903|SPS1_HUMAN	4.4	255.34	7840000	7910000	9110000	8770000	1	1.01	1.16	1.12	7880000	8940000	1	1.13	42911
1556	Q9P016|THYN1_HUMAN	4.4	231.63	8480000	8330000	9620000	9450000	1	0.98	1.13	1.11	8400000	9530000	1	1.13	25697
3537	Q8NBI6|XXLT1_HUMAN	4.4	142.46	1580000	1520000	1780000	1740000	1	0.96	1.13	1.1	1550000	1760000	1	1.13	43807
3736	Q05D32|CTSL2_HUMAN	4.4	123.29	1480000	1250000	1680000	1610000	1	0.84	1.13	1.09	1370000	1650000	1	1.21	52999
1416	P57740|NU107_HUMAN	4.39	177.82	4480000	4540000	5270000	5070000	1	1.01	1.18	1.13	4510000	5170000	1	1.15	106374
3120	P84090|ERH_HUMAN	4.39	173.72	5290000	5310000	6000000	6030000	1	1	1.13	1.14	5300000	6010000	1	1.13	12259
2720	Q8NBJ4|GOLM1_HUMAN	4.39	155.96	3630000	3690000	3210000	3170000	1	1.02	0.88	0.87	3660000	3190000	1	0.87	45333
5	P06733|ENOA_HUMAN	4.38	444.05	600000000	582000000	534000000	508000000	1	0.97	0.89	0.85	591000000	521000000	1	0.88	47169
1532	P62241|RS8_HUMAN	4.38	308.06	47700000	48000000	54600000	53900000	1	1.01	1.14	1.13	47900000	54300000	1	1.13	24205
2413	Q92563|TICN2_HUMAN	4.38	153.7	5280000	5100000	4550000	4540000	1	0.97	0.86	0.86	5190000	4540000	1	0.87	46779
3927	O43402|EMC8_HUMAN	4.38	113.25	5390000	5360000	4640000	4640000	1	1	0.86	0.86	5370000	4640000	1	0.86	23773
922	O75051|PLXA2_HUMAN	4.37	226.49	3840000	3910000	4450000	4330000	1	1.02	1.16	1.13	3870000	4390000	1	1.13	211103
2059	Q9Y394|DHRS7_HUMAN	4.37	200.55	8560000	8520000	7560000	7500000	1	1	0.88	0.88	8540000	7530000	1	0.88	38299
2260	Q13523|PRP4B_HUMAN	4.37	197.84	8300000	8140000	9460000	9170000	1	0.98	1.14	1.11	8220000	9320000	1	1.13	116987
2316	Q13884|SNTB1_HUMAN	4.37	154.52	3060000	3090000	2630000	2790000	1	1.01	0.86	0.91	3080000	2710000	1	0.88	58061
601	Q9Y520|PRC2C_HUMAN	4.36	279.62	6870000	7350000	7800000	8320000	1	1.07	1.13	1.21	7110000	8060000	1	1.13	316911
670	Q5T5Y3|CAMP1_HUMAN	4.36	240.54	6890000	6990000	8110000	7620000	1	1.02	1.18	1.11	6940000	7870000	1	1.13	177971
6815	Q8IZR5|CKLF4_HUMAN	4.36	94.43	1130000	1160000	861000	884000	1	1.03	0.76	0.78	1140000	872000	1	0.76	25828
187	Q9Y4I1|MYO5A_HUMAN	4.35	352.19	45800000	46100000	51800000	52400000	1	1.01	1.13	1.14	46000000	52100000	1	1.13	215403
1996	Q13443|ADAM9_HUMAN	4.35	217.53	2680000	2360000	2340000	2100000	1	0.88	0.87	0.79	2520000	2220000	1	0.88	90556
3996	Q6IQ23|PKHA7_HUMAN	4.35	99.73	867000	857000	692000	700000	1	0.99	0.8	0.81	862000	696000	1	0.81	127135
2117	P62745|RHOB_HUMAN	4.34	210.59	13500000	13300000	15400000	15000000	1	0.99	1.15	1.11	13400000	15200000	1	1.13	22123
1529	P46100|ATRX_HUMAN	4.34	203.29	2360000	2350000	2690000	2660000	1	1	1.14	1.12	2360000	2670000	1	1.13	282584
3385	P61326|MGN_HUMAN	4.34	177.12	2890000	2960000	2600000	2560000	1	1.03	0.9	0.89	2920000	2580000	1	0.88	17164
3386	Q96A72|MGN2_HUMAN	4.34	177.12	2890000	2960000	2600000	2560000	1	1.03	0.9	0.89	2920000	2580000	1	0.88	17276
1988	P48739|PIPNB_HUMAN	4.33	169.94	8110000	8390000	9700000	9410000	1	1.03	1.2	1.16	8250000	9550000	1	1.16	31540
1130	P04844|RPN2_HUMAN	4.32	278.13	19600000	20800000	15100000	20500000	1	1.06	0.77	1.05	20200000	17800000	1	0.88	69284
1020	Q9H307|PININ_HUMAN	4.32	221.38	8090000	8380000	9150000	9500000	1	1.04	1.13	1.18	8230000	9320000	1	1.13	81614
1642	P98175|RBM10_HUMAN	4.32	193.19	5570000	5250000	6260000	6000000	1	0.94	1.12	1.08	5410000	6130000	1	1.13	103533
1900	Q14258|TRI25_HUMAN	4.32	161.28	4510000	4460000	3790000	3880000	1	0.99	0.84	0.86	4480000	3830000	1	0.85	70974
3063	Q6P1L5|F117B_HUMAN	4.32	131.3	886000	921000	1070000	1100000	1	1.04	1.21	1.24	903000	1090000	1	1.2	61968
3977	Q08462|ADCY2_HUMAN	4.32	110.13	686000	705000	555000	567000	1	1.03	0.81	0.83	695000	561000	1	0.81	123603
3747	P14927|QCR7_HUMAN	4.32	104.94	1210000	1160000	1480000	1420000	1	0.96	1.22	1.17	1190000	1450000	1	1.22	13530
759	Q9UBE0|SAE1_HUMAN	4.31	260.57	15600000	15700000	17800000	17700000	1	1.01	1.14	1.13	15700000	17700000	1	1.13	38450
1044	Q9UBB6|NCDN_HUMAN	4.3	205.71	7830000	7830000	9090000	8640000	1	1	1.16	1.1	7830000	8870000	1	1.13	78864
3023	Q7Z589|EMSY_HUMAN	4.3	136.81	612000	605000	774000	724000	1	0.99	1.27	1.18	608000	749000	1	1.23	141467
4120	O43772|MCAT_HUMAN	4.3	101.95	5360000	5210000	4330000	4210000	1	0.97	0.81	0.79	5280000	4270000	1	0.81	32944
299	O43143|DHX15_HUMAN	4.29	305.8	30400000	27700000	31300000	34400000	1	0.91	1.03	1.13	29000000	32900000	1	1.13	90933
1065	Q13228|SBP1_HUMAN	4.29	244.26	8850000	8470000	7790000	7510000	1	0.96	0.88	0.85	8660000	7650000	1	0.88	52391
3724	Q58EX2|SDK2_HUMAN	4.29	154.96	1730000	1750000	1950000	1980000	1	1.02	1.13	1.15	1740000	1970000	1	1.13	239394
1279	Q7LBC6|KDM3B_HUMAN	4.28	189.78	6230000	6320000	7150000	7040000	1	1.01	1.15	1.13	6270000	7100000	1	1.13	191580
3994	Q8IY47|KBTB2_HUMAN	4.28	137.69	903000	876000	1040000	978000	1	0.97	1.15	1.08	889000	1010000	1	1.13	71331
2281	Q9Y4F5|C170B_HUMAN	4.27	160.74	1090000	1150000	1270000	1290000	1	1.06	1.17	1.19	1120000	1280000	1	1.15	171687
2683	P55081|MFAP1_HUMAN	4.27	153.3	7370000	7410000	6000000	7060000	1	1.01	0.81	0.96	7390000	6530000	1	0.88	51958
586	Q9NY47|CA2D2_HUMAN	4.26	284.27	10100000	10400000	11100000	12100000	1	1.03	1.1	1.2	10200000	11600000	1	1.13	129817
3991	Q9BQ95|ECSIT_HUMAN	4.26	170.8	967000	928000	1100000	1050000	1	0.96	1.13	1.08	948000	1070000	1	1.13	49148
2921	Q14938|NFIX_HUMAN	4.26	147.28	1320000	1370000	1570000	1500000	1	1.04	1.19	1.14	1340000	1540000	1	1.15	55098
3095	Q5R372|RBG1L_HUMAN	4.26	145.8	1040000	1060000	1240000	1180000	1	1.02	1.2	1.14	1050000	1210000	1	1.16	92513
352	P54652|HSP72_HUMAN	4.25	314.26	2030000	1980000	1780000	1640000	1	0.98	0.88	0.81	2010000	1710000	1	0.85	70021
4298	Q6ICG6|K0930_HUMAN	4.25	101.28	1080000	1120000	1310000	1330000	1	1.04	1.21	1.23	1100000	1320000	1	1.2	45794
1389	Q07955|SRSF1_HUMAN	4.24	307.28	28400000	29400000	32700000	32600000	1	1.03	1.15	1.15	28900000	32600000	1	1.13	27745
1319	Q53GQ0|DHB12_HUMAN	4.24	228.94	15700000	16400000	14100000	14300000	1	1.04	0.9	0.91	16100000	14200000	1	0.88	34324
1607	Q86U86|PB1_HUMAN	4.23	167.38	5490000	5630000	6560000	6430000	1	1.02	1.19	1.17	5560000	6490000	1	1.17	192946
96	Q07065|CKAP4_HUMAN	4.22	346.38	55100000	54900000	61700000	62600000	1	1	1.12	1.14	55000000	62200000	1	1.13	66023
1589	P55209|NP1L1_HUMAN	4.22	250.05	14400000	14100000	16500000	15700000	1	0.98	1.15	1.09	14300000	16100000	1	1.13	45374
2191	Q6IBS0|TWF2_HUMAN	4.22	215.16	4910000	4710000	5440000	5470000	1	0.96	1.11	1.11	4810000	5450000	1	1.13	39548
3451	Q9UBW7|ZMYM2_HUMAN	4.22	128.72	1020000	1020000	1240000	1220000	1	1	1.22	1.19	1020000	1230000	1	1.2	154910
6250	Q6V0I7|FAT4_HUMAN	4.22	124.26	482000	520000	647000	666000	1	1.08	1.34	1.38	501000	657000	1	1.31	542693
521	P05455|LA_HUMAN	4.21	289.3	40100000	40500000	45700000	45300000	1	1.01	1.14	1.13	40300000	45500000	1	1.13	46837
1360	Q8WXI9|P66B_HUMAN	4.21	206.79	3910000	3960000	4390000	4500000	1	1.01	1.12	1.15	3940000	4450000	1	1.13	65261
1446	P16144|ITB4_HUMAN	4.21	179.44	6960000	6770000	5990000	5780000	1	0.97	0.86	0.83	6860000	5880000	1	0.86	202166
2976	P06730|IF4E_HUMAN	4.2	175.43	11500000	10700000	13000000	12100000	1	0.94	1.13	1.06	11100000	12600000	1	1.13	25097
2820	Q8IY22|CMIP_HUMAN	4.2	158.29	867000	922000	1060000	1010000	1	1.06	1.22	1.17	894000	1030000	1	1.16	86331
1415	Q00535|CDK5_HUMAN	4.19	195.3	11800000	11500000	13100000	13100000	1	0.97	1.11	1.12	11600000	13100000	1	1.13	33304
3045	Q9GZZ9|UBA5_HUMAN	4.19	175.91	2020000	2050000	2290000	2300000	1	1.02	1.13	1.14	2030000	2300000	1	1.13	44863
3648	Q99470|SDF2_HUMAN	4.19	132.19	1350000	1350000	1530000	1520000	1	1	1.14	1.13	1350000	1520000	1	1.13	23026
3765	Q9UPW5|CBPC1_HUMAN	4.19	119.91	672000	641000	865000	703000	1	0.95	1.29	1.05	656000	784000	1	1.19	138448
4059	P50135|HNMT_HUMAN	4.19	115.08	759000	733000	666000	638000	1	0.97	0.88	0.84	746000	652000	1	0.87	33295
214	Q92614|MY18A_HUMAN	4.18	355.13	23000000	23200000	26400000	25900000	1	1.01	1.15	1.12	23100000	26100000	1	1.13	233113
774	Q9ULU8|CAPS1_HUMAN	4.18	257.12	11900000	12200000	13500000	13700000	1	1.03	1.14	1.15	12100000	13600000	1	1.13	152786
608	Q3V6T2|GRDN_HUMAN	4.18	248.44	11100000	11200000	12600000	12500000	1	1.01	1.14	1.13	11100000	12500000	1	1.13	216040
1165	Q9GZR7|DDX24_HUMAN	4.18	211.89	2170000	2240000	2450000	2530000	1	1.03	1.13	1.16	2210000	2490000	1	1.13	96332
3318	P15924|DESP_HUMAN	4.18	159.82	8880000	8260000	7560000	6980000	1	0.93	0.85	0.79	8570000	7270000	1	0.85	331774
369	Q12840|KIF5A_HUMAN	4.17	301.2	4780000	4900000	5490000	5440000	1	1.03	1.15	1.14	4840000	5460000	1	1.13	117378
603	O94967|WDR47_HUMAN	4.17	288.6	12600000	12700000	14700000	14000000	1	1.01	1.16	1.11	12700000	14300000	1	1.13	101949
1608	O43396|TXNL1_HUMAN	4.17	273.77	6520000	6520000	7470000	7250000	1	1	1.15	1.11	6520000	7360000	1	1.13	32251
2494	Q6UXH1|CREL2_HUMAN	4.17	172.64	6240000	6060000	6990000	6890000	1	0.97	1.12	1.11	6150000	6940000	1	1.13	38192
4411	Q8IYB1|M21D2_HUMAN	4.17	126.35	1380000	1450000	1790000	1520000	1	1.06	1.3	1.11	1420000	1650000	1	1.17	55800
887	P51114|FXR1_HUMAN	4.16	256.23	8530000	8710000	9590000	9870000	1	1.02	1.12	1.16	8620000	9730000	1	1.13	69721
1972	Q9UBH6|XPR1_HUMAN	4.16	200.15	4500000	4540000	5250000	4950000	1	1.01	1.17	1.1	4520000	5100000	1	1.13	81535
1976	P34913|HYES_HUMAN	4.16	196.43	5430000	5620000	5020000	4770000	1	1.03	0.92	0.88	5530000	4900000	1	0.89	62616
6576	Q03111|ENL_HUMAN	4.16	98.58	2030000	1980000	2500000	2400000	1	0.98	1.23	1.18	2000000	2450000	1	1.22	62056
4975	Q16666|IF16_HUMAN	4.16	96.6	542000	529000	881000	807000	1	0.98	1.63	1.49	536000	844000	1	1.58	88256
2198	P61088|UBE2N_HUMAN	4.15	208.8	13200000	13300000	11900000	11600000	1	1.01	0.9	0.88	13300000	11800000	1	0.89	17138
2856	Q96GM5|SMRD1_HUMAN	4.14	178	926000	933000	1060000	1040000	1	1.01	1.14	1.12	930000	1050000	1	1.13	58233
1580	O15372|EIF3H_HUMAN	4.13	263.54	6930000	6370000	7760000	7240000	1	0.92	1.12	1.04	6650000	7500000	1	1.13	39930
1059	P18583|SON_HUMAN	4.13	209.69	6880000	6970000	7820000	7790000	1	1.01	1.14	1.13	6920000	7810000	1	1.13	263827
2438	P61964|WDR5_HUMAN	4.13	200.26	5630000	5620000	6430000	6270000	1	1	1.14	1.11	5630000	6350000	1	1.13	36589
1886	Q8WXX5|DNJC9_HUMAN	4.13	195.88	2040000	2090000	2270000	2390000	1	1.02	1.11	1.17	2070000	2330000	1	1.13	29910
1504	O94925|GLSK_HUMAN	4.13	190.68	9120000	9420000	7500000	8870000	1	1.03	0.82	0.97	9270000	8190000	1	0.88	73461
3433	P62829|RL23_HUMAN	4.12	195.69	11200000	11300000	12400000	13000000	1	1.01	1.11	1.16	11300000	12700000	1	1.13	14865
2664	Q9Y2V2|CHSP1_HUMAN	4.12	169.14	5630000	5730000	6440000	6370000	1	1.02	1.14	1.13	5680000	6400000	1	1.13	15892
3909	Q6UW68|TM205_HUMAN	4.12	161.26	2790000	2810000	2500000	2470000	1	1	0.89	0.88	2800000	2480000	1	0.89	21198
129	P07197|NFM_HUMAN	4.11	405.44	117000000	116000000	130000000	132000000	1	0.99	1.11	1.13	117000000	131000000	1	1.13	102472
183	Q15075|EEA1_HUMAN	4.11	339.44	40100000	40100000	35700000	35500000	1	1	0.89	0.88	40100000	35600000	1	0.89	162465
2405	Q15147|PLCB4_HUMAN	4.11	170.63	4650000	4510000	3870000	4210000	1	0.97	0.83	0.91	4580000	4040000	1	0.88	134463
3880	Q96SB8|SMC6_HUMAN	4.11	120.25	559000	566000	655000	722000	1	1.01	1.17	1.29	562000	689000	1	1.22	126325
242	Q6P2Q9|PRP8_HUMAN	4.1	343.53	36400000	36800000	41800000	40800000	1	1.01	1.15	1.12	36600000	41300000	1	1.13	273599
179	Q9BUJ2|HNRL1_HUMAN	4.1	331.06	21200000	21200000	24400000	23400000	1	1	1.15	1.1	21200000	23900000	1	1.13	95739
2048	Q9UPY8|MARE3_HUMAN	4.1	221.69	25600000	25500000	29100000	28500000	1	1	1.14	1.11	25500000	28800000	1	1.13	31982
2245	P35080|PROF2_HUMAN	4.1	219.72	70200000	69600000	62900000	61200000	1	0.99	0.9	0.87	69900000	62000000	1	0.89	15046
5013	P81877|SSBP2_HUMAN	4.1	111.52	80300	83600	129000	133000	1	1.04	1.61	1.65	82000	131000	1	1.6	37828
200	P05023|AT1A1_HUMAN	4.09	368.86	25200000	25000000	22500000	22100000	1	1	0.89	0.88	25100000	22300000	1	0.89	112896
484	Q9UBT2|SAE2_HUMAN	4.09	300.94	24300000	19600000	22300000	27100000	1	0.8	0.92	1.11	21900000	24700000	1	1.13	71224
757	Q05086|UBE3A_HUMAN	4.09	235.07	6800000	6870000	7700000	7710000	1	1.01	1.13	1.13	6840000	7700000	1	1.13	100688
882	P10586|PTPRF_HUMAN	4.09	213.87	2750000	2700000	3190000	3060000	1	0.98	1.16	1.11	2720000	3120000	1	1.15	212877
1787	Q7Z478|DHX29_HUMAN	4.09	178.91	1890000	1880000	2170000	2080000	1	1	1.15	1.1	1890000	2130000	1	1.13	155235
3017	Q9NRG9|AAAS_HUMAN	4.09	125.14	1770000	1720000	2170000	1980000	1	0.97	1.23	1.12	1740000	2080000	1	1.19	59574
3852	Q8TDD1|DDX54_HUMAN	4.09	116.67	833000	783000	947000	958000	1	0.94	1.14	1.15	808000	953000	1	1.18	98595
1173	P30086|PEBP1_HUMAN	4.08	320.91	86000000	88500000	76400000	78500000	1	1.03	0.89	0.91	87200000	77400000	1	0.89	21057
283	O75145|LIPA3_HUMAN	4.08	288.07	8800000	9180000	10100000	10200000	1	1.04	1.14	1.16	8990000	10100000	1	1.13	133496
493	Q7L2E3|DHX30_HUMAN	4.08	245.38	13700000	14500000	15800000	16000000	1	1.06	1.15	1.17	14100000	15900000	1	1.13	133938
3726	Q16512|PKN1_HUMAN	4.08	132.62	1180000	1160000	1400000	1410000	1	0.98	1.18	1.19	1170000	1400000	1	1.2	103932
2776	P40429|RL13A_HUMAN	4.08	127.38	8460000	8300000	9600000	9450000	1	0.98	1.13	1.12	8380000	9530000	1	1.14	23577
4594	P33527|MRP1_HUMAN	4.08	106.6	1120000	1050000	1470000	1380000	1	0.94	1.32	1.24	1080000	1430000	1	1.32	171590
486	Q9BXP5|SRRT_HUMAN	4.07	277.57	21100000	20700000	23700000	23400000	1	0.98	1.12	1.11	20900000	23500000	1	1.13	100667
3933	Q7Z417|NUFP2_HUMAN	4.07	111.03	1500000	1510000	1830000	1800000	1	1	1.22	1.2	1500000	1810000	1	1.21	76121
1749	Q92752|TENR_HUMAN	4.06	185.86	3280000	3350000	3780000	3690000	1	1.02	1.15	1.12	3320000	3730000	1	1.13	149561
2821	Q9UNW1|MINP1_HUMAN	4.06	165.31	1460000	1300000	1640000	1470000	1	0.89	1.12	1.01	1380000	1550000	1	1.13	55051
1696	Q96JM3|CHAP1_HUMAN	4.06	159.38	4080000	4050000	4610000	4550000	1	0.99	1.13	1.12	4070000	4580000	1	1.13	89099
2088	O95758|PTBP3_HUMAN	4.06	157.16	1490000	1490000	1790000	1770000	1	1	1.2	1.19	1490000	1780000	1	1.19	59690
1293	P25325|THTM_HUMAN	4.05	209.99	14300000	14300000	15800000	16400000	1	1	1.1	1.14	14300000	16100000	1	1.13	33178
1306	P08243|ASNS_HUMAN	4.05	198.25	6400000	5890000	6960000	6860000	1	0.92	1.09	1.07	6140000	6910000	1	1.13	64370
1858	Q15303|ERBB4_HUMAN	4.05	166.84	2490000	2460000	2080000	2040000	1	0.99	0.84	0.82	2470000	2060000	1	0.83	146808
2590	Q9ULR3|PPM1H_HUMAN	4.04	201.9	2350000	2310000	2070000	2060000	1	0.98	0.88	0.88	2330000	2070000	1	0.89	56448
1981	Q13573|SNW1_HUMAN	4.04	172.84	6490000	6270000	7310000	7060000	1	0.97	1.13	1.09	6380000	7180000	1	1.13	61495
1444	O75150|BRE1B_HUMAN	4.03	188.65	5390000	5400000	6090000	6070000	1	1	1.13	1.13	5390000	6080000	1	1.13	113650
3026	Q86WA8|LONP2_HUMAN	4.03	137.36	3850000	3690000	4130000	4350000	1	0.96	1.07	1.13	3770000	4240000	1	1.13	94617
210	O75643|U520_HUMAN	4.02	397.15	31200000	31200000	35500000	34600000	1	1	1.14	1.11	31200000	35100000	1	1.13	244505
636	P62258|1433E_HUMAN	4.02	333.8	45200000	45000000	39900000	40300000	1	1	0.88	0.89	45100000	40100000	1	0.89	29174
2588	Q2TAA2|IAH1_HUMAN	4.01	188.35	5610000	5430000	4590000	5230000	1	0.97	0.82	0.93	5520000	4910000	1	0.89	27599
1276	P36542|ATPG_HUMAN	4	291.13	24300000	24600000	21600000	21800000	1	1.01	0.89	0.9	24400000	21700000	1	0.89	32996
1088	P10412|H14_HUMAN	4	275.45	2150000	2160000	2470000	2370000	1	1	1.15	1.1	2150000	2420000	1	1.12	21865
1135	O43684|BUB3_HUMAN	4	241.45	13000000	12700000	13900000	15000000	1	0.98	1.07	1.16	12900000	14500000	1	1.12	37155
1873	O94811|TPPP_HUMAN	4	233.56	15500000	15300000	13600000	13800000	1	0.99	0.88	0.89	15400000	13700000	1	0.89	23694
1656	P00492|HPRT_HUMAN	4	226.46	3660000	3650000	3280000	3220000	1	1	0.9	0.88	3650000	3250000	1	0.89	24579
2357	P84095|RHOG_HUMAN	4	182.51	3980000	3710000	3590000	3250000	1	0.93	0.9	0.82	3850000	3420000	1	0.89	21308
3965	Q9UPR5|NAC2_HUMAN	4	144.82	541000	504000	464000	465000	1	0.93	0.86	0.86	522000	465000	1	0.89	100368
3406	P19388|RPAB1_HUMAN	4	96.32	2700000	2770000	3410000	3410000	1	1.02	1.26	1.26	2730000	3410000	1	1.25	24551
783	O00178|GTPB1_HUMAN	3.99	234.67	7670000	7680000	8960000	8300000	1	1	1.17	1.08	7670000	8630000	1	1.12	72454
2953	P25398|RS12_HUMAN	3.98	204.06	15400000	15700000	17300000	17600000	1	1.02	1.13	1.14	15500000	17400000	1	1.12	14515
3375	Q9Y2H6|FND3A_HUMAN	3.98	140.15	2040000	2290000	2360000	2500000	1	1.13	1.16	1.23	2160000	2430000	1	1.12	131852
2285	P11234|RALB_HUMAN	3.97	220.17	2090000	2060000	2290000	2370000	1	0.99	1.1	1.14	2070000	2330000	1	1.12	23409
2310	O15084|ANR28_HUMAN	3.97	201.08	2920000	3010000	3370000	3300000	1	1.03	1.15	1.13	2970000	3330000	1	1.12	112966
2732	P14735|IDE_HUMAN	3.97	168.49	3020000	3000000	3450000	3320000	1	0.99	1.14	1.1	3010000	3380000	1	1.12	117968
2872	Q8ND24|RN214_HUMAN	3.97	155.85	2890000	2880000	3340000	3210000	1	1	1.16	1.11	2880000	3270000	1	1.14	77667
572	Q99719|SEPT5_HUMAN	3.96	298.68	26200000	26900000	30500000	29100000	1	1.03	1.16	1.11	26600000	29800000	1	1.12	42777
495	Q9HCM2|PLXA4_HUMAN	3.96	256.82	6500000	6670000	7350000	7440000	1	1.03	1.13	1.15	6580000	7400000	1	1.12	212454
1263	Q86XP3|DDX42_HUMAN	3.96	214.06	7160000	7360000	8230000	8080000	1	1.03	1.15	1.13	7260000	8160000	1	1.12	102975
2134	Q96ST3|SIN3A_HUMAN	3.96	154.23	5030000	5000000	5730000	5750000	1	0.99	1.14	1.14	5010000	5740000	1	1.15	145175
4254	Q6P9B6|TLDC1_HUMAN	3.96	124.75	2820000	2710000	3160000	3060000	1	0.96	1.12	1.09	2760000	3110000	1	1.13	50994
4243	O14653|GOSR2_HUMAN	3.96	118.22	671000	678000	799000	785000	1	1.01	1.19	1.17	674000	792000	1	1.17	24775
4244	tr|E7EQ34|E7EQ34_HUMAN	3.96	118.22	671000	678000	799000	785000	1	1.01	1.19	1.17	674000	792000	1	1.17	26864
660	P31946|1433B_HUMAN	3.95	300.5	11200000	12600000	13300000	13500000	1	1.12	1.18	1.2	11900000	13400000	1	1.12	28082
1212	Q9Y266|NUDC_HUMAN	3.95	249.08	18600000	18100000	20800000	20500000	1	0.97	1.12	1.1	18400000	20700000	1	1.12	38243
19	P14618|KPYM_HUMAN	3.94	448.21	190000000	199000000	164000000	182000000	1	1.05	0.87	0.96	194000000	173000000	1	0.89	57937
540	P55084|ECHB_HUMAN	3.94	310.06	36000000	36300000	32600000	31800000	1	1.01	0.91	0.88	36200000	32200000	1	0.89	51294
466	Q9UJS0|CMC2_HUMAN	3.94	251.45	11500000	11200000	10100000	10200000	1	0.97	0.88	0.88	11400000	10100000	1	0.89	74176
1269	P13797|PLST_HUMAN	3.94	204.47	5840000	6200000	4410000	6320000	1	1.06	0.76	1.08	6020000	5360000	1	0.89	70811
3656	Q8ND04|SMG8_HUMAN	3.94	152.6	570000	592000	669000	677000	1	1.04	1.17	1.19	581000	673000	1	1.16	109684
7762	Q96K19|RN170_HUMAN	3.94	84.78	949000	952000	761000	797000	1	1	0.8	0.84	951000	779000	1	0.82	29815
163	Q08211|DHX9_HUMAN	3.93	411.62	68100000	70000000	78300000	76700000	1	1.03	1.15	1.13	69000000	77500000	1	1.12	140958
1531	P06858|LIPL_HUMAN	3.93	226.11	11100000	10900000	9790000	9780000	1	0.99	0.89	0.88	11000000	9780000	1	0.89	53163
2087	Q96EK5|KBP_HUMAN	3.93	186.5	3870000	3940000	3430000	3520000	1	1.02	0.89	0.91	3900000	3480000	1	0.89	71814
1963	Q08AD1|CAMP2_HUMAN	3.93	173.94	5340000	5510000	6070000	6240000	1	1.03	1.14	1.17	5430000	6160000	1	1.13	168088
2661	Q9Y5Z4|HEBP2_HUMAN	3.92	176.41	3160000	3260000	2830000	2890000	1	1.03	0.9	0.91	3210000	2860000	1	0.89	22875
93	Q99798|ACON_HUMAN	3.91	365.93	79100000	80000000	69900000	71900000	1	1.01	0.88	0.91	79500000	70900000	1	0.89	85425
1948	O94964|SOGA1_HUMAN	3.91	185.64	1790000	1810000	2050000	1990000	1	1.02	1.15	1.11	1800000	2020000	1	1.12	159759
2749	O60610|DIAP1_HUMAN	3.91	153.09	1680000	1690000	1900000	1920000	1	1	1.13	1.14	1680000	1910000	1	1.14	141347
2210	P42262|GRIA2_HUMAN	3.91	147.06	1310000	1370000	1720000	1610000	1	1.05	1.31	1.23	1340000	1660000	1	1.24	98821
3309	Q9NSC5|HOME3_HUMAN	3.91	120.19	1520000	1460000	1850000	1690000	1	0.96	1.22	1.11	1490000	1770000	1	1.19	39836
3913	Q14CZ8|HECAM_HUMAN	3.91	112.96	1400000	1760000	1350000	1430000	1	1.26	0.97	1.03	1580000	1390000	1	0.88	46027
1336	P00387|NB5R3_HUMAN	3.9	309.87	29800000	30400000	27100000	26600000	1	1.02	0.91	0.89	30100000	26900000	1	0.89	34235
1516	P04792|HSPB1_HUMAN	3.9	291.56	21400000	22400000	19300000	19700000	1	1.05	0.9	0.92	21900000	19500000	1	0.89	22783
178	O15020|SPTN2_HUMAN	3.88	387.84	31100000	31700000	35100000	35300000	1	1.02	1.13	1.13	31400000	35200000	1	1.12	271323
1557	P53779|MK10_HUMAN	3.88	242.44	1950000	1910000	2230000	2090000	1	0.98	1.15	1.07	1930000	2160000	1	1.12	52586
1610	Q674X7|KAZRN_HUMAN	3.88	198.74	4730000	4870000	4200000	4350000	1	1.03	0.89	0.92	4800000	4280000	1	0.89	86351
3925	P35475|IDUA_HUMAN	3.87	91.18	2580000	2480000	2160000	2040000	1	0.96	0.84	0.79	2530000	2100000	1	0.83	72670
237	Q7Z460|CLAP1_HUMAN	3.86	325.41	14900000	14900000	16600000	16900000	1	1	1.11	1.13	14900000	16700000	1	1.12	169450
561	O60841|IF2P_HUMAN	3.86	240.39	17600000	17100000	18600000	20300000	1	0.97	1.06	1.15	17400000	19500000	1	1.12	138827
160	P00367|DHE3_HUMAN	3.85	346.33	24100000	23800000	21000000	21800000	1	0.99	0.87	0.9	24000000	21400000	1	0.89	61398
569	Q8WX93|PALLD_HUMAN	3.85	258.12	10900000	11300000	12600000	12300000	1	1.04	1.15	1.13	11100000	12400000	1	1.12	150564
2670	Q13424|SNTA1_HUMAN	3.85	132.77	1300000	1290000	1160000	1140000	1	1	0.89	0.88	1300000	1150000	1	0.89	53895
3328	Q9NZ72|STMN3_HUMAN	3.85	116.06	2100000	2090000	2600000	2510000	1	0.99	1.24	1.19	2090000	2550000	1	1.22	21017
62	P35580|MYH10_HUMAN	3.84	458.62	149000000	138000000	155000000	166000000	1	0.92	1.04	1.12	143000000	161000000	1	1.12	228997
1542	Q13363|CTBP1_HUMAN	3.84	233.28	3330000	3520000	3890000	3790000	1	1.06	1.17	1.14	3430000	3840000	1	1.12	47535
2277	P54819|KAD2_HUMAN	3.84	172.33	2000000	2070000	2300000	2280000	1	1.04	1.15	1.14	2030000	2290000	1	1.12	26478
3835	Q9H9Q2|CSN7B_HUMAN	3.84	131.11	498000	530000	589000	567000	1	1.06	1.18	1.14	514000	578000	1	1.12	29622
797	Q9BUQ8|DDX23_HUMAN	3.83	231.05	11200000	11400000	12600000	12700000	1	1.02	1.13	1.14	11300000	12600000	1	1.12	95583
2196	Q9C0E8|LNP_HUMAN	3.83	221.29	12000000	11900000	10500000	10800000	1	0.99	0.88	0.9	12000000	10700000	1	0.89	47740
2873	P07203|GPX1_HUMAN	3.83	206.64	11000000	10300000	12200000	11600000	1	0.94	1.11	1.06	10600000	11900000	1	1.12	22088
2499	Q9Y5P6|GMPPB_HUMAN	3.83	197.53	5710000	5650000	5120000	5030000	1	0.99	0.9	0.88	5680000	5070000	1	0.89	39834
3703	O95376|ARI2_HUMAN	3.83	118.9	583000	625000	678000	690000	1	1.07	1.16	1.18	604000	684000	1	1.13	57819
115	P51659|DHB4_HUMAN	3.82	390.53	95600000	94600000	85000000	84800000	1	0.99	0.89	0.89	95100000	84900000	1	0.89	79686
247	P09651|ROA1_HUMAN	3.82	356.54	26800000	27700000	30600000	30400000	1	1.03	1.14	1.13	27200000	30500000	1	1.12	38747
901	Q02978|M2OM_HUMAN	3.82	232.36	23800000	22800000	21000000	20600000	1	0.96	0.88	0.87	23300000	20800000	1	0.89	34062
1421	P19525|E2AK2_HUMAN	3.82	197.91	13800000	12500000	15400000	14100000	1	0.9	1.11	1.02	13200000	14800000	1	1.12	62094
1882	Q15154|PCM1_HUMAN	3.82	182.33	977000	1010000	1150000	1160000	1	1.03	1.18	1.19	991000	1160000	1	1.17	228531
2572	P02794|FRIH_HUMAN	3.82	164.95	11700000	12600000	10700000	10900000	1	1.08	0.92	0.94	12100000	10800000	1	0.89	21226
3970	Q9NRY5|F1142_HUMAN	3.82	126.84	3470000	3390000	4660000	4620000	1	0.98	1.34	1.33	3430000	4640000	1	1.35	55468
6107	Q9BXK5|B2L13_HUMAN	3.82	117	1020000	1390000	818000	965000	1	1.37	0.81	0.95	1210000	891000	1	0.74	52723
1587	P07737|PROF1_HUMAN	3.8	351.09	24900000	24900000	28300000	27400000	1	1	1.14	1.1	24900000	27900000	1	1.12	15054
2773	Q9NR12|PDLI7_HUMAN	3.8	133.55	2230000	2210000	1930000	1990000	1	0.99	0.87	0.89	2220000	1960000	1	0.88	49845
3982	Q96BY9|SARAF_HUMAN	3.8	119.68	502000	509000	447000	446000	1	1.01	0.89	0.89	505000	447000	1	0.88	36975
4046	P31937|3HIDH_HUMAN	3.8	105.54	2530000	2550000	2190000	2160000	1	1.01	0.87	0.86	2540000	2170000	1	0.86	35329
80	O94819|KBTBB_HUMAN	3.78	328.01	19600000	20000000	21700000	22600000	1	1.02	1.11	1.16	19800000	22100000	1	1.12	65720
997	Q9H0D6|XRN2_HUMAN	3.78	206.51	7370000	7550000	8440000	8260000	1	1.02	1.14	1.12	7460000	8350000	1	1.12	108583
1946	Q8N1G2|CMTR1_HUMAN	3.78	186.82	3010000	3050000	3460000	3330000	1	1.01	1.15	1.1	3030000	3390000	1	1.12	95321
2875	P04066|FUCO_HUMAN	3.78	152.55	3710000	3800000	3300000	3410000	1	1.02	0.89	0.92	3750000	3360000	1	0.89	53689
3667	Q9BY76|ANGL4_HUMAN	3.77	127.11	1840000	1800000	2080000	1990000	1	0.97	1.13	1.08	1820000	2030000	1	1.12	45214
752	P14314|GLU2B_HUMAN	3.76	248.23	42400000	43700000	37000000	39900000	1	1.03	0.87	0.94	43000000	38500000	1	0.89	59426
2759	O95260|ATE1_HUMAN	3.76	161.7	3800000	3760000	4260000	4190000	1	0.99	1.12	1.1	3780000	4220000	1	1.12	59090
204	O75122|CLAP2_HUMAN	3.75	335.28	18400000	18900000	20900000	20800000	1	1.03	1.13	1.13	18600000	20900000	1	1.12	141132
304	Q6P2E9|EDC4_HUMAN	3.75	286.36	11800000	11800000	13300000	13000000	1	1	1.13	1.1	11800000	13200000	1	1.12	151661
3594	Q7Z4H8|KDEL2_HUMAN	3.75	136.51	1310000	1660000	1460000	1870000	1	1.26	1.11	1.42	1490000	1660000	1	1.12	58573
3142	P14678|RSMB_HUMAN	3.75	121.82	5050000	5100000	5790000	5820000	1	1.01	1.15	1.15	5080000	5800000	1	1.14	24610
3154	P63162|RSMN_HUMAN	3.75	121.82	5050000	5100000	5790000	5820000	1	1.01	1.15	1.15	5080000	5800000	1	1.14	24614
4177	Q9H902|REEP1_HUMAN	3.75	105.43	2360000	2510000	2900000	2930000	1	1.07	1.23	1.24	2430000	2920000	1	1.2	22255
98	P12814|ACTN1_HUMAN	3.74	364.13	31400000	31400000	28200000	28000000	1	1	0.9	0.89	31400000	28100000	1	0.89	103058
981	Q14103|HNRPD_HUMAN	3.74	321.23	60700000	61100000	68100000	68100000	1	1.01	1.12	1.12	60900000	68100000	1	1.12	38434
732	Q14966|ZN638_HUMAN	3.74	220.19	6070000	6460000	6790000	7210000	1	1.06	1.12	1.19	6270000	7000000	1	1.12	220623
1863	Q16630|CPSF6_HUMAN	3.74	197.89	5420000	5740000	6120000	6360000	1	1.06	1.13	1.17	5580000	6240000	1	1.12	59210
1419	Q9UBP0|SPAST_HUMAN	3.74	192.12	4120000	4180000	4700000	4610000	1	1.01	1.14	1.12	4150000	4650000	1	1.12	67197
3921	P08069|IGF1R_HUMAN	3.74	143.03	2210000	2070000	2520000	2370000	1	0.94	1.14	1.08	2140000	2440000	1	1.14	154792
3039	Q15582|BGH3_HUMAN	3.74	128.6	1510000	1520000	1770000	1780000	1	1	1.17	1.18	1510000	1770000	1	1.17	74681
3806	Q92733|PRCC_HUMAN	3.74	122.53	1460000	1470000	1650000	1620000	1	1	1.13	1.11	1460000	1640000	1	1.12	52418
3229	O75953|DNJB5_HUMAN	3.74	119.02	1200000	1130000	1430000	1310000	1	0.94	1.19	1.09	1170000	1370000	1	1.17	39134
988	O75781|PALM_HUMAN	3.73	260.57	11900000	12200000	10700000	10900000	1	1.02	0.9	0.91	12000000	10800000	1	0.89	42076
1813	Q8TEQ6|GEMI5_HUMAN	3.73	191.38	2580000	2600000	2880000	2910000	1	1	1.12	1.12	2590000	2890000	1	1.12	168589
1514	Q52LJ0|FA98B_HUMAN	3.73	181.84	8540000	4110000	4690000	9600000	1	0.48	0.55	1.12	6320000	7140000	1	1.13	37191
2424	Q9NZ08|ERAP1_HUMAN	3.73	166.04	3230000	3020000	3580000	3430000	1	0.93	1.11	1.06	3120000	3500000	1	1.12	107235
3107	Q9H444|CHM4B_HUMAN	3.73	158.47	3770000	3680000	4170000	4160000	1	0.97	1.11	1.1	3730000	4170000	1	1.12	24950
3767	O75164|KDM4A_HUMAN	3.73	124.31	315000	301000	363000	367000	1	0.95	1.15	1.16	308000	365000	1	1.18	120662
231	O75533|SF3B1_HUMAN	3.72	331.55	17200000	17500000	19500000	19300000	1	1.02	1.13	1.12	17400000	19400000	1	1.12	145830
213	Q5SW79|CE170_HUMAN	3.72	314.49	31300000	31700000	35700000	34700000	1	1.01	1.14	1.11	31500000	35200000	1	1.12	175292
346	P34931|HS71L_HUMAN	3.72	298.19	1820000	1590000	2160000	1980000	1	0.87	1.18	1.08	1710000	2070000	1	1.21	70375
2184	A6NE02|BTBDH_HUMAN	3.72	176.02	4770000	5120000	4350000	4510000	1	1.07	0.91	0.95	4950000	4430000	1	0.9	52471
2654	Q5VWQ8|DAB2P_HUMAN	3.72	159.75	1490000	1500000	1670000	1660000	1	1.01	1.13	1.12	1490000	1670000	1	1.12	131625
2217	Q9H3G5|CPVL_HUMAN	3.72	143.95	1690000	1710000	1420000	1460000	1	1.01	0.84	0.86	1700000	1440000	1	0.85	54164
2382	P07996|TSP1_HUMAN	3.72	138.73	1330000	1390000	1580000	1630000	1	1.05	1.19	1.23	1360000	1600000	1	1.18	129383
3409	Q9H6X2|ANTR1_HUMAN	3.72	123.1	2930000	2770000	2490000	2490000	1	0.95	0.85	0.85	2850000	2490000	1	0.87	62789
110	P28838|AMPL_HUMAN	3.71	335.3	28000000	27600000	25600000	24300000	1	0.99	0.91	0.87	27800000	24900000	1	0.9	56166
688	O75146|HIP1R_HUMAN	3.71	257.83	5390000	5370000	6060000	5970000	1	1	1.12	1.11	5380000	6010000	1	1.12	119388
970	O15394|NCAM2_HUMAN	3.71	238.57	11200000	11100000	12500000	12500000	1	0.99	1.11	1.11	11200000	12500000	1	1.12	93046
1171	O75223|GGCT_HUMAN	3.7	274.15	16000000	11400000	9660000	14900000	1	0.71	0.6	0.93	13700000	12300000	1	0.9	21008
1337	Q96GD0|PLPP_HUMAN	3.7	237.87	9860000	10200000	11100000	11300000	1	1.03	1.12	1.15	10000000	11200000	1	1.12	31698
1536	Q9UPT8|ZC3H4_HUMAN	3.7	197.84	2150000	2130000	2420000	2360000	1	0.99	1.13	1.1	2140000	2390000	1	1.12	140256
4214	Q15784|NDF2_HUMAN	3.7	123.18	819000	1180000	902000	1340000	1	1.45	1.1	1.63	1000000	1120000	1	1.12	41361
3358	Q06330|SUH_HUMAN	3.7	118.81	2020000	2060000	2450000	2430000	1	1.02	1.21	1.2	2040000	2440000	1	1.19	55637
3116	Q96QD9|UIF_HUMAN	3.7	110.56	3210000	3070000	3680000	3620000	1	0.95	1.14	1.13	3140000	3650000	1	1.16	35818
344	P49189|AL9A1_HUMAN	3.69	321.92	35000000	35800000	31600000	31800000	1	1.02	0.9	0.91	35400000	31700000	1	0.9	53802
874	Q7Z4V5|HDGR2_HUMAN	3.69	228.92	16500000	16500000	18900000	18000000	1	1	1.14	1.09	16500000	18400000	1	1.12	74317
2197	P18754|RCC1_HUMAN	3.69	202.03	5080000	5100000	5650000	5710000	1	1	1.11	1.12	5090000	5680000	1	1.12	44969
2556	Q9BV20|MTNA_HUMAN	3.69	184.29	2750000	2780000	2410000	2550000	1	1.01	0.88	0.93	2770000	2480000	1	0.9	39150
3164	Q8NFZ4|NLGN2_HUMAN	3.69	143.01	481000	487000	554000	562000	1	1.01	1.15	1.17	484000	558000	1	1.15	90820
1520	O75306|NDUS2_HUMAN	3.68	220.19	19500000	22000000	18800000	18300000	1	1.13	0.97	0.94	20700000	18600000	1	0.9	52546
3705	Q14997|PSME4_HUMAN	3.68	162.04	1350000	1350000	1520000	1510000	1	1	1.13	1.12	1350000	1520000	1	1.12	211332
394	P57737|CORO7_HUMAN	3.67	278.95	15200000	15300000	17100000	16900000	1	1.01	1.13	1.12	15200000	17000000	1	1.12	100605
1469	P34949|MPI_HUMAN	3.67	244.64	6250000	6290000	5630000	5600000	1	1.01	0.9	0.9	6270000	5620000	1	0.9	46656
995	Q8WUD1|RAB2B_HUMAN	3.67	211.38	2750000	2570000	3000000	2940000	1	0.94	1.09	1.07	2660000	2970000	1	1.12	24214
4347	Q9HBH1|DEFM_HUMAN	3.67	120.81	1160000	1210000	1340000	1310000	1	1.04	1.15	1.13	1190000	1320000	1	1.12	27013
1939	Q99747|SNAG_HUMAN	3.66	241.94	7730000	7780000	8650000	8650000	1	1.01	1.12	1.12	7760000	8650000	1	1.12	34746
1228	Q9ULK5|VANG2_HUMAN	3.66	231.9	6880000	6820000	7640000	7640000	1	0.99	1.11	1.11	6850000	7640000	1	1.12	59715
987	Q9NZM1|MYOF_HUMAN	3.66	208.76	4000000	4080000	4570000	4480000	1	1.02	1.14	1.12	4040000	4520000	1	1.12	234706
3336	Q9NR09|BIRC6_HUMAN	3.66	177.36	1640000	1640000	1850000	1860000	1	1	1.13	1.14	1640000	1860000	1	1.13	530260
1609	P62826|RAN_HUMAN	3.65	280.07	39300000	42400000	44600000	46600000	1	1.08	1.13	1.19	40900000	45600000	1	1.12	24423
549	P17480|UBF1_HUMAN	3.65	253.71	18700000	18600000	21100000	20600000	1	0.99	1.13	1.1	18700000	20800000	1	1.12	89406
2199	P37840|SYUA_HUMAN	3.65	244.03	9120000	9200000	10400000	10000000	1	1.01	1.14	1.1	9160000	10200000	1	1.12	14460
1929	Q8NBJ5|GT251_HUMAN	3.65	155.15	3590000	3720000	4150000	4100000	1	1.04	1.16	1.14	3660000	4130000	1	1.13	71636
2507	Q99523|SORT_HUMAN	3.65	135.96	2890000	2820000	3420000	3210000	1	0.98	1.18	1.11	2850000	3310000	1	1.16	92068
2571	O95631|NET1_HUMAN	3.65	131.12	923000	962000	1100000	1110000	1	1.04	1.19	1.2	942000	1100000	1	1.17	67748
529	P05771|KPCB_HUMAN	3.64	293.12	14700000	14800000	13100000	13300000	1	1	0.89	0.9	14700000	13200000	1	0.9	76869
716	Q8IX12|CCAR1_HUMAN	3.64	290.86	9950000	10000000	11200000	11000000	1	1.01	1.13	1.11	9980000	11100000	1	1.12	132821
1195	Q9UBQ7|GRHPR_HUMAN	3.64	271.58	19500000	21100000	17900000	18500000	1	1.08	0.92	0.95	20300000	18200000	1	0.9	35668
1748	Q9P035|HACD3_HUMAN	3.64	251.2	18400000	17900000	16500000	16000000	1	0.97	0.9	0.87	18100000	16200000	1	0.9	43160
1250	P08572|CO4A2_HUMAN	3.64	242.64	8590000	9060000	7860000	7970000	1	1.06	0.92	0.93	8830000	7910000	1	0.9	167553
1259	P40222|TXLNA_HUMAN	3.64	222.09	4520000	4680000	5040000	5210000	1	1.04	1.12	1.15	4600000	5130000	1	1.12	61891
1349	O00505|IMA4_HUMAN	3.64	212.68	3220000	3290000	3660000	3600000	1	1.02	1.14	1.12	3250000	3630000	1	1.11	57811
1244	Q9UPU5|UBP24_HUMAN	3.64	201.19	6320000	6270000	7080000	6960000	1	0.99	1.12	1.1	6290000	7020000	1	1.11	294364
3809	Q9C0C4|SEM4C_HUMAN	3.64	99.83	313000	321000	383000	372000	1	1.03	1.22	1.19	317000	377000	1	1.19	92623
496	Q9H2M9|RBGPR_HUMAN	3.63	257.5	15900000	16200000	18000000	17800000	1	1.02	1.13	1.12	16100000	17900000	1	1.11	155984
2878	P30519|HMOX2_HUMAN	3.63	144.2	3890000	3770000	4340000	4200000	1	0.97	1.12	1.08	3830000	4270000	1	1.11	36033
4858	Q9Y6N7|ROBO1_HUMAN	3.63	140.42	1070000	1120000	1230000	1210000	1	1.05	1.15	1.14	1090000	1220000	1	1.11	180928
627	P12081|SYHC_HUMAN	3.62	244.39	20300000	20100000	22800000	22200000	1	0.99	1.13	1.1	20200000	22500000	1	1.11	57411
2173	O76031|CLPX_HUMAN	3.62	212.91	4710000	4660000	5270000	5180000	1	0.99	1.12	1.1	4690000	5220000	1	1.11	69224
1474	P12955|PEPD_HUMAN	3.62	203.15	9570000	9450000	8690000	8370000	1	0.99	0.91	0.87	9510000	8530000	1	0.9	54548
2480	Q9BV38|WDR18_HUMAN	3.62	142.49	6910000	6840000	7780000	7610000	1	0.99	1.13	1.1	6870000	7690000	1	1.12	47405
3932	Q12996|CSTF3_HUMAN	3.62	127.9	1860000	1790000	2200000	2060000	1	0.96	1.18	1.11	1820000	2130000	1	1.17	82922
132	P12956|XRCC6_HUMAN	3.61	379.3	72100000	71900000	80800000	79700000	1	1	1.12	1.1	72000000	80300000	1	1.11	69843
982	O95433|AHSA1_HUMAN	3.61	273.61	23800000	26700000	26800000	29500000	1	1.13	1.13	1.24	25200000	28100000	1	1.11	38274
2475	Q9Y2Z4|SYYM_HUMAN	3.61	179.3	2410000	2490000	2730000	2740000	1	1.03	1.13	1.13	2450000	2730000	1	1.11	53199
2389	P60228|EIF3E_HUMAN	3.61	150.02	5220000	4970000	5870000	5700000	1	0.95	1.13	1.09	5100000	5790000	1	1.14	52221
3690	O60568|PLOD3_HUMAN	3.61	106.57	695000	711000	825000	839000	1	1.02	1.19	1.21	703000	832000	1	1.18	84785
306	Q9UKV3|ACINU_HUMAN	3.6	282.71	17200000	17600000	19500000	19300000	1	1.02	1.13	1.12	17400000	19400000	1	1.11	151861
817	Q9NR45|SIAS_HUMAN	3.6	275.22	13800000	13700000	15600000	15000000	1	1	1.13	1.09	13700000	15300000	1	1.11	40308
3849	O00462|MANBA_HUMAN	3.6	133.47	1800000	1840000	1600000	1600000	1	1.02	0.89	0.89	1820000	1600000	1	0.88	100895
416	P27694|RFA1_HUMAN	3.59	293.15	11100000	11300000	12700000	12400000	1	1.02	1.14	1.11	11200000	12500000	1	1.11	68138
1138	Q9Y3F4|STRAP_HUMAN	3.59	267.68	14500000	14900000	16500000	16300000	1	1.03	1.14	1.12	14700000	16400000	1	1.11	38438
2188	O60832|DKC1_HUMAN	3.59	196.6	5640000	5600000	6330000	6200000	1	0.99	1.12	1.1	5620000	6260000	1	1.11	57674
3493	Q6P1X6|CH082_HUMAN	3.59	105.18	3420000	3770000	2980000	3050000	1	1.1	0.87	0.89	3600000	3020000	1	0.84	23889
1073	Q8TDC3|BRSK1_HUMAN	3.58	209.36	8250000	8160000	9160000	9120000	1	0.99	1.11	1.1	8210000	9140000	1	1.11	85087
2428	Q8IWS0|PHF6_HUMAN	3.58	156.5	6290000	6140000	7080000	6880000	1	0.98	1.13	1.09	6220000	6980000	1	1.12	41290
3103	Q9NNW7|TRXR2_HUMAN	3.58	154.12	1390000	1310000	1200000	1100000	1	0.94	0.86	0.79	1350000	1150000	1	0.85	56507
2848	P57723|PCBP4_HUMAN	3.58	145.11	745000	719000	858000	858000	1	0.96	1.15	1.15	732000	858000	1	1.17	41482
3222	P50281|MMP14_HUMAN	3.58	143.51	4390000	4570000	3390000	4660000	1	1.04	0.77	1.06	4480000	4020000	1	0.9	65894
442	Q13435|SF3B2_HUMAN	3.57	289.96	15500000	15700000	17500000	17300000	1	1.01	1.13	1.11	15600000	17400000	1	1.11	100228
1430	P32969|RL9_HUMAN	3.57	229.6	13200000	13600000	15100000	14700000	1	1.03	1.14	1.11	13400000	14900000	1	1.11	21863
1247	P51688|SPHM_HUMAN	3.57	224.28	17000000	16200000	15200000	14500000	1	0.95	0.9	0.85	16600000	14900000	1	0.9	56695
1533	Q9UPQ3|AGAP1_HUMAN	3.57	221.57	884000	855000	967000	968000	1	0.97	1.09	1.1	869000	968000	1	1.11	94470
3518	O00541|PESC_HUMAN	3.57	116.07	2440000	2530000	2860000	3000000	1	1.03	1.17	1.23	2490000	2930000	1	1.18	68003
3389	Q96JB2|COG3_HUMAN	3.56	138.07	807000	789000	935000	939000	1	0.98	1.16	1.16	798000	937000	1	1.17	94096
228	Q7Z4S6|KI21A_HUMAN	3.55	327.43	18600000	18500000	20600000	20700000	1	1	1.11	1.12	18600000	20600000	1	1.11	187178
1676	Q9BQ52|RNZ2_HUMAN	3.55	169.72	2870000	2950000	3270000	3300000	1	1.03	1.14	1.15	2910000	3280000	1	1.13	92219
3412	Q8NI27|THOC2_HUMAN	3.55	144.14	2550000	2530000	3000000	2970000	1	0.99	1.18	1.16	2540000	2980000	1	1.18	182774
174	P09874|PARP1_HUMAN	3.54	345.51	74800000	74900000	84300000	82300000	1	1	1.13	1.1	74900000	83300000	1	1.11	113084
454	P17980|PRS6A_HUMAN	3.54	294.05	20100000	20600000	22600000	22700000	1	1.03	1.12	1.13	20400000	22600000	1	1.11	49204
392	Q7L576|CYFP1_HUMAN	3.54	292.18	8330000	8330000	7440000	7530000	1	1	0.89	0.9	8330000	7490000	1	0.9	145182
1378	Q12874|SF3A3_HUMAN	3.54	240.89	8420000	8540000	9360000	9500000	1	1.01	1.11	1.13	8480000	9430000	1	1.11	58849
1606	Q96PY5|FMNL2_HUMAN	3.54	187.97	2830000	2820000	3000000	3280000	1	0.99	1.06	1.16	2820000	3140000	1	1.11	123321
1327	Q13616|CUL1_HUMAN	3.54	180.91	4520000	4440000	5060000	4960000	1	0.98	1.12	1.1	4480000	5010000	1	1.12	89678
1661	Q8N9I9|DTX3_HUMAN	3.54	177.54	3800000	3780000	4210000	4220000	1	0.99	1.11	1.11	3790000	4210000	1	1.11	37988
2367	P00450|CERU_HUMAN	3.54	150.53	2030000	2110000	1780000	1850000	1	1.04	0.88	0.91	2070000	1820000	1	0.88	122205
3115	Q8ND83|SLAI1_HUMAN	3.54	148.09	1240000	1300000	1110000	1170000	1	1.05	0.9	0.94	1270000	1140000	1	0.9	60595
2721	Q9GZU8|F192A_HUMAN	3.54	147.36	5390000	5070000	5940000	5700000	1	0.94	1.1	1.06	5230000	5820000	1	1.11	28912
3212	Q9H4L4|SENP3_HUMAN	3.54	146.92	747000	748000	850000	844000	1	1	1.14	1.13	748000	847000	1	1.13	65010
2368	P61018|RAB4B_HUMAN	3.53	151.92	2650000	2720000	3080000	2990000	1	1.03	1.16	1.13	2690000	3030000	1	1.13	23587
3601	Q16656|NRF1_HUMAN	3.53	113.14	1710000	1690000	1980000	1910000	1	0.99	1.16	1.12	1700000	1940000	1	1.15	53541
888	P12931|SRC_HUMAN	3.52	265.13	4960000	5080000	5670000	5490000	1	1.02	1.14	1.11	5020000	5580000	1	1.11	59835
1540	tr|H0YHG0|H0YHG0_HUMAN	3.52	203.29	12400000	12600000	13900000	13900000	1	1.01	1.12	1.12	12500000	13900000	1	1.11	59194
2020	A8MVW0|F1712_HUMAN	3.52	190.73	600000	622000	684000	675000	1	1.04	1.14	1.12	611000	679000	1	1.11	87435
1659	Q9P0L2|MARK1_HUMAN	3.52	185.08	2000000	1770000	2330000	1990000	1	0.89	1.17	1	1890000	2160000	1	1.15	89003
2814	Q99767|APBA2_HUMAN	3.52	136.46	1260000	1280000	1440000	1400000	1	1.01	1.14	1.11	1270000	1420000	1	1.12	82512
3184	Q8IZ21|PHAR4_HUMAN	3.51	148.31	1610000	1620000	1850000	1810000	1	1.01	1.15	1.13	1610000	1830000	1	1.13	78211
3556	Q9H2X9|S12A5_HUMAN	3.51	144.39	1990000	1940000	2280000	2160000	1	0.98	1.15	1.09	1970000	2220000	1	1.13	126183
3754	P16220|CREB1_HUMAN	3.51	125.88	903000	973000	1040000	1060000	1	1.08	1.16	1.17	938000	1050000	1	1.12	36688
1593	Q9NR46|SHLB2_HUMAN	3.5	197.58	3490000	3390000	3830000	3810000	1	0.97	1.1	1.09	3440000	3820000	1	1.11	43974
366	Q07157|ZO1_HUMAN	3.49	289.78	18000000	17800000	16100000	16100000	1	0.99	0.89	0.9	17900000	16100000	1	0.9	195457
3168	Q5XUX1|FBXW9_HUMAN	3.49	164.18	4770000	4870000	4330000	4350000	1	1.02	0.91	0.91	4820000	4340000	1	0.9	54115
407	P40926|MDHM_HUMAN	3.48	392.35	142000000	136000000	159000000	150000000	1	0.96	1.12	1.06	139000000	154000000	1	1.11	35503
61	O43390|HNRPR_HUMAN	3.48	346.8	49700000	49900000	55500000	55300000	1	1	1.11	1.11	49800000	55400000	1	1.11	70943
2209	P62269|RS18_HUMAN	3.48	174.57	10100000	9880000	11600000	10900000	1	0.98	1.15	1.08	10000000	11300000	1	1.13	17719
3784	Q5TC84|OGRL1_HUMAN	3.48	123.57	1150000	1150000	1000000	1020000	1	1	0.87	0.89	1150000	1010000	1	0.88	51252
3772	Q9UMZ2|SYNRG_HUMAN	3.48	106.03	1080000	1090000	1330000	1270000	1	1.01	1.23	1.18	1090000	1300000	1	1.2	140654
1123	Q9NZN5|ARHGC_HUMAN	3.47	204.34	5360000	5530000	6000000	6180000	1	1.03	1.12	1.15	5450000	6090000	1	1.12	173231
1620	Q14019|COTL1_HUMAN	3.47	194.62	11700000	11400000	10500000	10300000	1	0.98	0.9	0.88	11500000	10400000	1	0.9	15945
1845	Q9H857|NT5D2_HUMAN	3.47	184.61	4440000	4470000	4990000	4910000	1	1.01	1.12	1.11	4460000	4950000	1	1.11	60719
1995	O96019|ACL6A_HUMAN	3.47	181.83	3820000	3600000	4220000	4020000	1	0.94	1.1	1.05	3710000	4120000	1	1.11	47461
3002	Q6STE5|SMRD3_HUMAN	3.47	175.56	851000	847000	945000	941000	1	1	1.11	1.11	849000	943000	1	1.11	55016
4353	Q8N9F7|GDPD1_HUMAN	3.47	119.01	1220000	1270000	1420000	1430000	1	1.04	1.16	1.17	1250000	1430000	1	1.14	36167
68	P38646|GRP75_HUMAN	3.46	392.84	73500000	74600000	63800000	69600000	1	1.01	0.87	0.95	74100000	66700000	1	0.9	73681
1083	P05556|ITB1_HUMAN	3.46	227.95	10500000	10900000	12100000	11700000	1	1.04	1.15	1.11	10700000	11900000	1	1.11	88415
2470	P62158|CALM_HUMAN	3.46	210.39	13700000	14200000	12300000	12800000	1	1.03	0.9	0.94	13900000	12500000	1	0.9	16838
1590	Q8NC51|PAIRB_HUMAN	3.46	198.99	17600000	17700000	19800000	19400000	1	1.01	1.13	1.1	17700000	19600000	1	1.11	44965
2172	P18077|RL35A_HUMAN	3.46	191.79	14000000	13600000	15900000	14800000	1	0.98	1.14	1.06	13800000	15300000	1	1.11	12538
610	P43155|CACP_HUMAN	3.44	235.35	16100000	16400000	14800000	14500000	1	1.02	0.92	0.9	16300000	14700000	1	0.9	70858
2712	P55735|SEC13_HUMAN	3.44	177.38	2680000	2580000	2460000	2280000	1	0.96	0.92	0.85	2630000	2370000	1	0.9	35541
2615	Q9Y6E2|BZW2_HUMAN	3.44	136.5	5750000	5530000	6400000	6230000	1	0.96	1.11	1.08	5640000	6310000	1	1.12	48162
4196	Q96M27|PRRC1_HUMAN	3.44	93.29	5040000	4740000	5680000	5620000	1	0.94	1.13	1.11	4890000	5650000	1	1.16	46701
387	O15523|DDX3Y_HUMAN	3.43	288.62	224000	238000	152000	164000	1	1.06	0.68	0.73	231000	158000	1	0.68	73154
915	P51648|AL3A2_HUMAN	3.43	247.38	18200000	18900000	15700000	17700000	1	1.04	0.86	0.97	18600000	16700000	1	0.9	54848
947	P78406|RAE1L_HUMAN	3.43	235.42	15300000	15300000	17300000	16700000	1	1	1.13	1.09	15300000	17000000	1	1.11	40968
3712	P47914|RL29_HUMAN	3.43	159.43	4800000	4630000	5250000	5210000	1	0.96	1.09	1.09	4710000	5230000	1	1.11	17752
2694	O43236|SEPT4_HUMAN	3.43	133.69	831000	856000	676000	743000	1	1.03	0.81	0.89	844000	710000	1	0.84	55098
3442	Q16637|SMN_HUMAN	3.43	131.03	5560000	5440000	6280000	6030000	1	0.98	1.13	1.08	5500000	6150000	1	1.12	31849
258	P49368|TCPG_HUMAN	3.42	317.53	58600000	58700000	65600000	64600000	1	1	1.12	1.1	58700000	65100000	1	1.11	60534
841	Q9Y4E6|WDR7_HUMAN	3.42	247.53	8280000	8200000	9140000	9140000	1	0.99	1.1	1.1	8240000	9140000	1	1.11	163809
2662	P46783|RS10_HUMAN	3.42	193.71	488000	499000	652000	620000	1	1.02	1.34	1.27	493000	636000	1	1.29	18898
3250	O94953|KDM4B_HUMAN	3.42	126.61	476000	478000	585000	543000	1	1	1.23	1.14	477000	564000	1	1.18	121897
3915	Q15375|EPHA7_HUMAN	3.42	123.02	321000	340000	413000	411000	1	1.06	1.29	1.28	331000	412000	1	1.25	112097
46	P0DMV9|HS71B_HUMAN	3.41	410.7	44700000	44500000	49600000	49300000	1	1	1.11	1.1	44600000	49500000	1	1.11	70052
47	P0DMV8|HS71A_HUMAN	3.41	410.7	44700000	44500000	49600000	49300000	1	1	1.11	1.1	44600000	49500000	1	1.11	70052
635	P25391|LAMA1_HUMAN	3.41	254.66	31200000	30000000	28300000	26900000	1	0.96	0.91	0.86	30600000	27600000	1	0.9	337084
1903	Q8IYB7|DI3L2_HUMAN	3.41	162.35	5050000	5040000	5720000	5640000	1	1	1.13	1.12	5040000	5680000	1	1.13	99279
3210	Q8N0W3|FUK_HUMAN	3.41	145.52	2790000	2770000	2310000	2630000	1	0.99	0.83	0.94	2780000	2470000	1	0.89	117623
2693	Q8WU90|ZC3HF_HUMAN	3.41	133.43	2850000	2980000	3330000	3330000	1	1.05	1.17	1.17	2920000	3330000	1	1.14	48603
790	Q9UHG3|PCYOX_HUMAN	3.4	295.41	20200000	20700000	18400000	18500000	1	1.03	0.91	0.92	20500000	18500000	1	0.9	56640
1142	O00299|CLIC1_HUMAN	3.4	278	13300000	13300000	15000000	14500000	1	1	1.13	1.09	13300000	14800000	1	1.11	26923
803	Q6PKG0|LARP1_HUMAN	3.4	270.63	6820000	6910000	7560000	7660000	1	1.01	1.11	1.12	6860000	7610000	1	1.11	123510
2885	Q9Y657|SPIN1_HUMAN	3.4	163.71	2690000	2790000	3040000	3040000	1	1.04	1.13	1.13	2740000	3040000	1	1.11	29601
3201	Q2Y0W8|S4A8_HUMAN	3.4	162.01	1700000	1810000	1930000	1960000	1	1.07	1.14	1.16	1750000	1940000	1	1.11	122938
3281	Q92871|PMM1_HUMAN	3.4	124.91	870000	867000	1040000	960000	1	1	1.19	1.1	868000	999000	1	1.15	29747
642	P11274|BCR_HUMAN	3.39	248.1	7200000	7530000	8030000	8290000	1	1.05	1.12	1.15	7360000	8160000	1	1.11	142819
848	Q00325|MPCP_HUMAN	3.39	239.87	73100000	73100000	66000000	65900000	1	1	0.9	0.9	73100000	66000000	1	0.9	40095
2287	P08708|RS17_HUMAN	3.39	228.57	4860000	4670000	5410000	5160000	1	0.96	1.11	1.06	4770000	5280000	1	1.11	15550
2956	Q6NXT6|TAPT1_HUMAN	3.39	153.79	839000	845000	746000	739000	1	1.01	0.89	0.88	842000	743000	1	0.88	64260
2737	Q8N335|GPD1L_HUMAN	3.38	153.65	2470000	2520000	2780000	2750000	1	1.02	1.13	1.11	2490000	2760000	1	1.11	38419
2809	Q96GQ7|DDX27_HUMAN	3.38	145.15	1890000	2040000	2230000	2230000	1	1.08	1.18	1.18	1970000	2230000	1	1.13	89835
4345	O15085|ARHGB_HUMAN	3.38	138.97	656000	667000	752000	731000	1	1.02	1.15	1.11	662000	741000	1	1.12	167704
3917	Q9BTT0|AN32E_HUMAN	3.38	132.46	6660000	6630000	7570000	7320000	1	1	1.14	1.1	6640000	7440000	1	1.12	30692
5639	P62328|TYB4_HUMAN	3.38	96.84	839000	861000	603000	617000	1	1.03	0.72	0.73	850000	610000	1	0.72	5053
2960	P15927|RFA2_HUMAN	3.37	150.5	2800000	2920000	3100000	3240000	1	1.04	1.11	1.16	2860000	3170000	1	1.11	29247
3699	O00193|SMAP_HUMAN	3.37	141.73	12600000	12800000	13800000	14300000	1	1.01	1.09	1.14	12700000	14100000	1	1.11	20333
3935	Q9UPP5|K1107_HUMAN	3.37	132.49	773000	789000	881000	904000	1	1.02	1.14	1.17	781000	892000	1	1.14	155681
523	Q02252|MMSA_HUMAN	3.36	282.89	21500000	21500000	19600000	19200000	1	1	0.91	0.89	21500000	19400000	1	0.9	57840
1574	O00264|PGRC1_HUMAN	3.36	257.25	21100000	21800000	23800000	23600000	1	1.03	1.13	1.12	21400000	23700000	1	1.11	21671
1809	O43172|PRP4_HUMAN	3.36	188.37	5510000	5540000	6190000	6050000	1	1.01	1.12	1.1	5530000	6120000	1	1.11	58449
4618	Q12805|FBLN3_HUMAN	3.36	102.47	275000	272000	178000	198000	1	0.99	0.65	0.72	273000	188000	1	0.69	54641
232	Q9Y4G6|TLN2_HUMAN	3.35	345.26	10200000	10300000	11300000	11400000	1	1.01	1.11	1.12	10200000	11300000	1	1.11	271611
100	Q9Y230|RUVB2_HUMAN	3.35	330.95	39600000	40100000	44800000	43500000	1	1.01	1.13	1.1	39900000	44200000	1	1.11	51157
422	Q9BX66|SRBS1_HUMAN	3.35	298.76	25200000	25400000	23000000	22600000	1	1.01	0.92	0.9	25300000	22800000	1	0.9	142513
623	Q9UPT5|EXOC7_HUMAN	3.35	256.76	11800000	11400000	13000000	12700000	1	0.97	1.1	1.08	11600000	12800000	1	1.11	83382
1009	P28370|SMCA1_HUMAN	3.34	231.98	3480000	3410000	3910000	3740000	1	0.98	1.12	1.07	3440000	3820000	1	1.11	122605
2164	Q9NZL9|MAT2B_HUMAN	3.34	190.38	6170000	6150000	7220000	6420000	1	1	1.17	1.04	6160000	6820000	1	1.11	37552
2302	P35251|RFC1_HUMAN	3.34	172.18	605000	583000	656000	675000	1	0.96	1.08	1.11	594000	665000	1	1.12	128254
767	Q9NWH9|SLTM_HUMAN	3.33	221.63	10400000	10400000	11600000	11400000	1	1	1.12	1.1	10400000	11500000	1	1.11	117149
1272	P25788|PSA3_HUMAN	3.33	190.48	42600000	42500000	37700000	39300000	1	1	0.88	0.92	42600000	38500000	1	0.9	28433
2343	Q14202|ZMYM3_HUMAN	3.33	156.82	1820000	1800000	2080000	1920000	1	0.99	1.15	1.06	1810000	2000000	1	1.11	152379
3130	Q9Y625|GPC6_HUMAN	3.32	139.48	809000	816000	912000	923000	1	1.01	1.13	1.14	812000	917000	1	1.13	62736
4041	Q9NPF5|DMAP1_HUMAN	3.32	104.01	1090000	1100000	1330000	1260000	1	1.01	1.22	1.16	1090000	1290000	1	1.18	52993
208	Q9NYU2|UGGG1_HUMAN	3.31	338.47	29600000	29200000	32900000	32200000	1	0.99	1.11	1.09	29400000	32500000	1	1.11	177189
1015	Q9H267|VP33B_HUMAN	3.31	234.72	8370000	8170000	9470000	8830000	1	0.98	1.13	1.05	8270000	9150000	1	1.11	70585
633	P61221|ABCE1_HUMAN	3.3	271.92	18700000	18600000	20900000	20300000	1	0.99	1.12	1.09	18600000	20600000	1	1.11	67314
1000	Q24JP5|T132A_HUMAN	3.3	248.82	3810000	3930000	4280000	4290000	1	1.03	1.12	1.12	3870000	4290000	1	1.11	110110
811	P23921|RIR1_HUMAN	3.3	248.26	16000000	15100000	17700000	16700000	1	0.95	1.11	1.05	15600000	17200000	1	1.11	90070
1617	Q9NQ29|LUC7L_HUMAN	3.3	199.84	1790000	1770000	2100000	1990000	1	0.99	1.17	1.11	1780000	2040000	1	1.15	43728
2353	O14786|NRP1_HUMAN	3.3	192.45	2870000	3000000	3260000	3230000	1	1.04	1.14	1.12	2930000	3250000	1	1.11	103134
3320	Q8WXF0|SRS12_HUMAN	3.3	157.97	1070000	1160000	1460000	1470000	1	1.08	1.36	1.37	1110000	1460000	1	1.31	30512
3756	A8MW92|P20L1_HUMAN	3.29	158.78	5040000	4900000	5670000	5310000	1	0.97	1.13	1.05	4970000	5490000	1	1.11	115010
3741	Q7L311|ARMX2_HUMAN	3.29	134.59	1560000	1580000	1780000	1750000	1	1.01	1.14	1.12	1570000	1760000	1	1.12	65684
4140	Q5C9Z4|NOM1_HUMAN	3.28	100.5	587000	586000	736000	712000	1	1	1.25	1.21	587000	724000	1	1.23	96257
3191	P49458|SRP09_HUMAN	3.28	97.34	2230000	2240000	2790000	2630000	1	1	1.25	1.18	2230000	2710000	1	1.21	10112
956	Q92804|RBP56_HUMAN	3.27	244.06	5900000	6370000	6270000	7290000	1	1.08	1.06	1.24	6140000	6780000	1	1.11	61830
1143	Q9H2U1|DHX36_HUMAN	3.27	232.86	2600000	2670000	2890000	2930000	1	1.03	1.11	1.13	2640000	2910000	1	1.11	114760
1553	Q9P0V9|SEP10_HUMAN	3.27	232.29	3910000	3760000	3480000	3460000	1	0.96	0.89	0.89	3840000	3470000	1	0.9	52593
2008	Q9NYB0|TE2IP_HUMAN	3.27	195.79	3630000	3970000	4270000	4130000	1	1.09	1.18	1.14	3800000	4200000	1	1.11	44260
1759	Q4G176|ACSF3_HUMAN	3.27	180.73	4750000	4940000	4360000	4410000	1	1.04	0.92	0.93	4850000	4390000	1	0.9	64130
2511	Q99447|PCY2_HUMAN	3.27	159.03	2290000	2390000	2610000	2650000	1	1.04	1.14	1.16	2340000	2630000	1	1.13	43836
2460	O00422|SAP18_HUMAN	3.27	158.47	2550000	2540000	2830000	2790000	1	1	1.11	1.09	2540000	2810000	1	1.11	17561
7224	Q8WXS5|CCG8_HUMAN	3.27	61.26	147000	145000	238000	227000	1	0.99	1.61	1.54	146000	232000	1	1.59	43313
8274	Q93098|WNT8B_HUMAN	3.27	52.07	129000	154000	378000	365000	1	1.19	2.94	2.84	141000	372000	1	2.63	38721
333	P09543|CN37_HUMAN	3.26	307.94	35300000	35400000	32200000	31900000	1	1	0.91	0.9	35400000	32000000	1	0.9	47579
458	Q8WXF1|PSPC1_HUMAN	3.26	283.63	14500000	15100000	16500000	16200000	1	1.04	1.13	1.12	14800000	16400000	1	1.11	58744
3047	O00399|DCTN6_HUMAN	3.26	174.76	4320000	4260000	4570000	4910000	1	0.99	1.06	1.14	4290000	4740000	1	1.11	20747
2324	Q7Z2Z2|EFL1_HUMAN	3.26	154.67	5660000	5670000	6500000	6380000	1	1	1.15	1.13	5670000	6440000	1	1.14	125430
3353	Q9Y314|NOSIP_HUMAN	3.26	134.92	2660000	2610000	3020000	2900000	1	0.98	1.13	1.09	2640000	2960000	1	1.12	33172
4284	Q9HCK8|CHD8_HUMAN	3.26	118.7	1480000	1380000	1790000	1690000	1	0.93	1.21	1.14	1430000	1740000	1	1.22	290518
1188	Q02878|RL6_HUMAN	3.25	225.95	22800000	25000000	29400000	23400000	1	1.1	1.29	1.03	23900000	26400000	1	1.1	32728
2648	P07101|TY3H_HUMAN	3.25	132.49	1220000	1290000	1470000	1420000	1	1.06	1.21	1.17	1250000	1450000	1	1.16	58600
3368	O95456|PSMG1_HUMAN	3.25	131.91	5750000	5560000	6380000	6110000	1	0.97	1.11	1.06	5650000	6250000	1	1.1	32854
269	P38159|RBMX_HUMAN	3.24	335.98	46500000	45300000	51600000	49800000	1	0.98	1.11	1.07	45900000	50700000	1	1.1	42332
611	P23471|PTPRZ_HUMAN	3.24	283.07	17200000	16400000	15400000	14900000	1	0.96	0.9	0.87	16800000	15200000	1	0.91	254585
3717	O43660|PLRG1_HUMAN	3.24	161.17	1290000	1340000	1490000	1420000	1	1.04	1.15	1.09	1320000	1450000	1	1.1	57194
753	Q2TAY7|SMU1_HUMAN	3.23	227.36	13100000	12900000	14600000	14100000	1	0.98	1.11	1.08	13000000	14300000	1	1.1	57544
6566	P07108|ACBP_HUMAN	3.23	108.24	1890000	1740000	1340000	1350000	1	0.92	0.71	0.71	1820000	1350000	1	0.74	10044
539	Q15366|PCBP2_HUMAN	3.22	331.65	12200000	12500000	13900000	13400000	1	1.02	1.14	1.09	12400000	13700000	1	1.1	38580
2399	P16104|H2AX_HUMAN	3.22	249.32	2910000	2790000	2580000	2410000	1	0.96	0.89	0.83	2850000	2490000	1	0.88	15145
3443	P47813|IF1AX_HUMAN	3.22	207.97	19200000	19500000	17700000	17300000	1	1.01	0.92	0.9	19300000	17500000	1	0.91	16460
3471	O14602|IF1AY_HUMAN	3.22	207.97	19200000	19500000	17700000	17300000	1	1.01	0.92	0.9	19300000	17500000	1	0.91	16442
3589	Q9H9J2|RM44_HUMAN	3.22	128.39	519000	515000	597000	569000	1	0.99	1.15	1.1	517000	583000	1	1.13	37535
2152	Q96HU8|DIRA2_HUMAN	3.22	125.78	762000	772000	930000	915000	1	1.01	1.22	1.2	767000	923000	1	1.2	22485
5298	Q9BV81|EMC6_HUMAN	3.22	99.61	2320000	2400000	2790000	2710000	1	1.03	1.2	1.17	2360000	2750000	1	1.17	12017
150	Q15029|U5S1_HUMAN	3.21	343.97	32300000	32900000	36200000	35800000	1	1.02	1.12	1.11	32600000	36000000	1	1.1	109436
673	P55795|HNRH2_HUMAN	3.21	273.97	7580000	7690000	8230000	8620000	1	1.02	1.09	1.14	7640000	8430000	1	1.1	49264
2761	Q5JTH9|RRP12_HUMAN	3.21	192.06	1460000	1470000	1640000	1590000	1	1.01	1.12	1.09	1460000	1610000	1	1.1	143702
1910	Q13017|RHG05_HUMAN	3.21	167.7	4480000	4450000	3910000	3910000	1	0.99	0.87	0.87	4460000	3910000	1	0.88	172459
3084	Q9NVG8|TBC13_HUMAN	3.21	166.94	4980000	4970000	5580000	5400000	1	1	1.12	1.08	4970000	5490000	1	1.1	46554
2180	Q9H7Z7|PGES2_HUMAN	3.21	152.93	3020000	2930000	3330000	3260000	1	0.97	1.1	1.08	2970000	3300000	1	1.11	41943
722	Q9Y2E4|DIP2C_HUMAN	3.2	227.78	3830000	3960000	4330000	4330000	1	1.03	1.13	1.13	3900000	4330000	1	1.11	170766
3966	Q15024|EXOS7_HUMAN	3.2	118.69	493000	490000	558000	583000	1	0.99	1.13	1.18	492000	570000	1	1.16	31821
2591	Q8NCN5|PDPR_HUMAN	3.19	167	2210000	2290000	2470000	2510000	1	1.03	1.12	1.14	2250000	2490000	1	1.11	99364
534	O75054|IGSF3_HUMAN	3.18	275.78	45300000	46300000	52800000	48200000	1	1.02	1.16	1.06	45800000	50500000	1	1.1	135196
1132	P30084|ECHM_HUMAN	3.18	242.45	28500000	24300000	21600000	26200000	1	0.85	0.76	0.92	26400000	23900000	1	0.91	31387
2527	Q12824|SNF5_HUMAN	3.18	195.97	2060000	2120000	2310000	2310000	1	1.03	1.12	1.12	2090000	2310000	1	1.1	44141
52	P13639|EF2_HUMAN	3.17	384.3	146000000	147000000	158000000	166000000	1	1.01	1.08	1.13	147000000	162000000	1	1.1	95338
81	P35908|K22E_HUMAN	3.17	308.9	9770000	10400000	11200000	11000000	1	1.06	1.15	1.12	10100000	11100000	1	1.1	65433
1525	Q99426|TBCB_HUMAN	3.17	268.38	27400000	27200000	30400000	29800000	1	0.99	1.11	1.09	27300000	30100000	1	1.1	27326
491	Q92974|ARHG2_HUMAN	3.17	265.97	11500000	11700000	13000000	12500000	1	1.02	1.13	1.09	11600000	12800000	1	1.1	111543
3623	P05204|HMGN2_HUMAN	3.17	219.49	25600000	24500000	26400000	28800000	1	0.96	1.03	1.13	25000000	27600000	1	1.1	9393
3752	Q08AE8|SPIR1_HUMAN	3.17	154.67	1240000	1220000	1360000	1360000	1	0.98	1.1	1.09	1230000	1360000	1	1.1	85544
3362	Q9NQP4|PFD4_HUMAN	3.17	112.61	1680000	1720000	1990000	1970000	1	1.02	1.18	1.17	1700000	1980000	1	1.16	15314
157	P08237|PFKAM_HUMAN	3.16	358.07	54200000	54200000	49500000	48900000	1	1	0.91	0.9	54200000	49200000	1	0.91	85183
2430	Q969E4|TCAL3_HUMAN	3.15	189.97	2130000	2150000	1990000	1890000	1	1.01	0.93	0.89	2140000	1940000	1	0.91	22502
1805	Q86X76|NIT1_HUMAN	3.15	176.68	8340000	8240000	7690000	7350000	1	0.99	0.92	0.88	8290000	7520000	1	0.91	35896
4549	P01019|ANGT_HUMAN	3.14	125.14	836000	863000	600000	662000	1	1.03	0.72	0.79	849000	631000	1	0.74	53154
1206	P78310|CXAR_HUMAN	3.13	243.11	20300000	21100000	22800000	22700000	1	1.04	1.12	1.12	20700000	22800000	1	1.1	40030
1667	P25098|ARBK1_HUMAN	3.13	187.07	3100000	3060000	3350000	3430000	1	0.99	1.08	1.11	3080000	3390000	1	1.1	79574
4089	Q86SK9|SCD5_HUMAN	3.13	143.89	3280000	3180000	2680000	3180000	1	0.97	0.82	0.97	3230000	2930000	1	0.91	37610
3061	Q04726|TLE3_HUMAN	3.13	139.26	1030000	1100000	1190000	1170000	1	1.07	1.16	1.13	1060000	1180000	1	1.11	83417
3207	Q9Y224|CN166_HUMAN	3.13	134.09	677000	699000	775000	775000	1	1.03	1.14	1.14	688000	775000	1	1.13	28068
131	P46821|MAP1B_HUMAN	3.12	518.22	286000000	284000000	314000000	313000000	1	0.99	1.1	1.09	285000000	314000000	1	1.1	270632
866	Q07960|RHG01_HUMAN	3.12	263.83	19200000	19700000	17600000	17800000	1	1.03	0.92	0.93	19500000	17700000	1	0.91	50436
585	P07384|CAN1_HUMAN	3.12	250	23400000	23700000	21300000	21400000	1	1.01	0.91	0.92	23600000	21400000	1	0.91	81890
904	Q14669|TRIPC_HUMAN	3.12	244.26	5040000	5220000	5500000	5790000	1	1.04	1.09	1.15	5130000	5640000	1	1.1	220432
720	P07947|YES_HUMAN	3.12	239	5890000	5670000	5340000	5160000	1	0.96	0.91	0.88	5780000	5250000	1	0.91	60801
1287	Q8IXB1|DJC10_HUMAN	3.12	219.79	5360000	5300000	5900000	5840000	1	0.99	1.1	1.09	5330000	5870000	1	1.1	91080
1323	O95870|ABHGA_HUMAN	3.12	188.27	5660000	6010000	6430000	6440000	1	1.06	1.14	1.14	5840000	6430000	1	1.1	63243
2369	O95400|CD2B2_HUMAN	3.12	179.73	2390000	2390000	2600000	2660000	1	1	1.09	1.11	2390000	2630000	1	1.1	37646
2905	Q8NB37|PDDC1_HUMAN	3.12	177.88	2340000	2360000	2070000	2210000	1	1.01	0.88	0.94	2350000	2140000	1	0.91	23298
2934	O43164|PJA2_HUMAN	3.12	152.32	970000	989000	1150000	1080000	1	1.02	1.19	1.11	979000	1120000	1	1.14	78214
58	P08238|HS90B_HUMAN	3.11	420.44	122000000	122000000	132000000	137000000	1	1	1.09	1.12	122000000	135000000	1	1.1	83264
457	Q9UJU6|DBNL_HUMAN	3.11	290.63	21000000	22400000	18300000	21200000	1	1.07	0.87	1.01	21700000	19700000	1	0.91	48207
1357	Q8WVV9|HNRLL_HUMAN	3.11	222.36	8620000	8620000	9560000	9420000	1	1	1.11	1.09	8620000	9490000	1	1.1	60083
2448	Q86U42|PABP2_HUMAN	3.11	209.18	10200000	10200000	11400000	11100000	1	1.01	1.12	1.09	10200000	11300000	1	1.1	32749
1964	P35813|PPM1A_HUMAN	3.11	202.32	4850000	4860000	5460000	5220000	1	1	1.13	1.08	4850000	5340000	1	1.1	42448
1129	Q5T8P6|RBM26_HUMAN	3.11	199.51	5750000	5860000	6520000	6370000	1	1.02	1.13	1.11	5810000	6450000	1	1.11	113597
1715	P02768|ALBU_HUMAN	3.11	185.05	41000000	43000000	32100000	42600000	1	1.05	0.78	1.04	42000000	37400000	1	0.89	69367
2617	Q14232|EI2BA_HUMAN	3.11	172.07	4590000	4490000	5080000	4920000	1	0.98	1.11	1.07	4540000	5000000	1	1.1	33712
4621	Q8IZ69|TRM2A_HUMAN	3.11	130.57	1510000	1350000	1640000	1500000	1	0.89	1.09	1	1430000	1570000	1	1.1	68726
778	Q12765|SCRN1_HUMAN	3.1	309.51	35200000	34800000	31900000	31700000	1	0.99	0.91	0.9	35000000	31800000	1	0.91	46382
1133	O94905|ERLN2_HUMAN	3.1	251.56	18800000	18700000	17000000	17100000	1	0.99	0.9	0.91	18800000	17100000	1	0.91	37840
1677	P62244|RS15A_HUMAN	3.1	203.1	11100000	11300000	12300000	12300000	1	1.02	1.11	1.11	11200000	12300000	1	1.1	14840
1874	Q8NCW5|NNRE_HUMAN	3.1	176.44	7070000	7180000	6430000	6510000	1	1.02	0.91	0.92	7120000	6470000	1	0.91	31675
2715	Q9UKF6|CPSF3_HUMAN	3.1	169.41	3360000	3380000	3740000	3680000	1	1	1.11	1.1	3370000	3710000	1	1.1	77486
3419	Q5T5C0|STXB5_HUMAN	3.1	157.17	1180000	1230000	1350000	1300000	1	1.04	1.14	1.1	1200000	1320000	1	1.1	127572
3398	O94910|AGRL1_HUMAN	3.1	130.69	1210000	1270000	1430000	1390000	1	1.05	1.18	1.14	1240000	1410000	1	1.13	162716
1282	Q14257|RCN2_HUMAN	3.09	270.18	12500000	12600000	11500000	11300000	1	1.01	0.92	0.91	12600000	11400000	1	0.91	36876
593	Q9Y2W1|TR150_HUMAN	3.09	257.87	25900000	25600000	28300000	28400000	1	0.99	1.09	1.1	25700000	28300000	1	1.1	108666
616	Q08378|GOGA3_HUMAN	3.09	233.87	6180000	6330000	6910000	6850000	1	1.02	1.12	1.11	6250000	6880000	1	1.1	167354
4233	Q96A26|F162A_HUMAN	3.09	86.38	3250000	3070000	2350000	3120000	1	0.95	0.72	0.96	3160000	2740000	1	0.87	17342
3541	P61956|SUMO2_HUMAN	3.08	141.37	5010000	5120000	4440000	4410000	1	1.02	0.89	0.88	5060000	4430000	1	0.87	10871
249	P62333|PRS10_HUMAN	3.07	290.66	34800000	34700000	38500000	37900000	1	1	1.11	1.09	34800000	38200000	1	1.1	44173
666	Q9Y6G9|DC1L1_HUMAN	3.07	282.5	15100000	14900000	16900000	16200000	1	0.99	1.12	1.07	15000000	16500000	1	1.1	56579
784	P10253|LYAG_HUMAN	3.07	254.21	15600000	15600000	14200000	14200000	1	1	0.91	0.91	15600000	14200000	1	0.91	105324
2895	P19105|ML12A_HUMAN	3.07	233.09	6480000	6730000	7180000	7350000	1	1.04	1.11	1.13	6610000	7270000	1	1.1	19794
2896	O14950|ML12B_HUMAN	3.07	233.09	6480000	6730000	7180000	7350000	1	1.04	1.11	1.13	6610000	7270000	1	1.1	19779
1697	P18621|RL17_HUMAN	3.07	220.05	18700000	18700000	20300000	20800000	1	1	1.09	1.11	18700000	20600000	1	1.1	21397
1701	tr|A0A0A6YYL6|A0A0A6YYL6_HUMAN	3.07	220.05	18700000	18700000	20300000	20800000	1	1	1.09	1.11	18700000	20600000	1	1.1	26373
2268	P20839|IMDH1_HUMAN	3.07	177.4	2360000	2360000	2630000	2560000	1	1	1.11	1.08	2360000	2600000	1	1.1	55406
1738	Q9P0V3|SH3B4_HUMAN	3.07	173.41	2930000	3040000	2670000	2700000	1	1.04	0.91	0.92	2990000	2680000	1	0.9	107496
2585	Q9BSJ2|GCP2_HUMAN	3.07	161.53	3900000	3280000	3270000	3220000	1	0.84	0.84	0.83	3590000	3250000	1	0.9	102534
3551	Q9BVL2|NUP58_HUMAN	3.07	142.1	5200000	5070000	5800000	5490000	1	0.98	1.12	1.06	5140000	5650000	1	1.1	60897
2442	Q96J01|THOC3_HUMAN	3.07	137.16	4440000	4390000	4930000	5010000	1	0.99	1.11	1.13	4410000	4970000	1	1.13	38772
1960	Q86YM7|HOME1_HUMAN	3.06	185.29	4120000	4140000	4600000	4490000	1	1	1.12	1.09	4130000	4540000	1	1.1	40277
3866	P31321|KAP1_HUMAN	3.06	161.11	814000	805000	1040000	1010000	1	0.99	1.28	1.24	809000	1020000	1	1.26	43073
2701	P62906|RL10A_HUMAN	3.06	151.76	6670000	6370000	7320000	7020000	1	0.96	1.1	1.05	6520000	7170000	1	1.1	24831
2334	Q14766|LTBP1_HUMAN	3.06	149.28	705000	696000	812000	768000	1	0.99	1.15	1.09	701000	790000	1	1.13	186795
4324	P04732|MT1E_HUMAN	3.06	104.49	97000	92100	42000	32800	1	0.95	0.43	0.34	94500	37400	1	0.4	6014
4596	P04628|WNT1_HUMAN	3.06	98.48	926000	870000	682000	611000	1	0.94	0.74	0.66	898000	647000	1	0.72	40982
1411	P26440|IVD_HUMAN	3.05	242.22	13200000	13300000	12000000	12100000	1	1.01	0.91	0.92	13200000	12100000	1	0.91	46319
1492	Q6NUK1|SCMC1_HUMAN	3.05	174.67	8540000	8390000	9510000	9100000	1	0.98	1.11	1.07	8470000	9310000	1	1.1	53354
2747	Q9H078|CLPB_HUMAN	3.05	161.94	2890000	2860000	3190000	3130000	1	0.99	1.1	1.08	2880000	3160000	1	1.1	78729
3490	P36639|8ODP_HUMAN	3.05	155.09	3470000	3580000	3830000	3920000	1	1.03	1.1	1.13	3530000	3880000	1	1.1	22520
3367	Q9NR19|ACSA_HUMAN	3.05	147.02	576000	596000	640000	666000	1	1.03	1.11	1.16	586000	653000	1	1.11	78580
3635	Q9BVC4|LST8_HUMAN	3.05	139.59	1340000	1330000	1530000	1410000	1	0.99	1.14	1.05	1340000	1470000	1	1.1	35876
2215	Q9H0W9|CK054_HUMAN	3.04	190.15	4800000	4800000	5280000	5270000	1	1	1.1	1.1	4800000	5280000	1	1.1	35117
3034	Q9ULA0|DNPEP_HUMAN	3.04	187.04	1560000	1500000	1740000	1630000	1	0.96	1.11	1.04	1530000	1680000	1	1.1	52428
2144	P48729|KC1A_HUMAN	3.04	177.27	3560000	3560000	3950000	3870000	1	1	1.11	1.09	3560000	3910000	1	1.1	38915
1497	Q709F0|ACD11_HUMAN	3.04	174.67	6200000	6120000	5610000	5400000	1	0.99	0.9	0.87	6160000	5510000	1	0.89	87283
4085	P13987|CD59_HUMAN	3.04	126.18	3060000	2990000	3400000	3390000	1	0.98	1.11	1.11	3020000	3390000	1	1.12	14177
6386	Q8N357|S35F6_HUMAN	3.04	109.77	1320000	1380000	1200000	1170000	1	1.04	0.91	0.89	1350000	1180000	1	0.88	40214
911	P61019|RAB2A_HUMAN	3.03	250.5	12200000	13200000	14000000	13900000	1	1.08	1.15	1.14	12700000	13900000	1	1.1	23546
701	Q04917|1433F_HUMAN	3.02	284.4	14300000	14900000	15700000	16400000	1	1.04	1.1	1.14	14600000	16000000	1	1.1	28219
1111	O00754|MA2B1_HUMAN	3.02	228.49	10200000	10500000	9400000	9420000	1	1.02	0.92	0.92	10300000	9410000	1	0.91	113744
1798	Q13247|SRSF6_HUMAN	3.02	157.87	7850000	8210000	9290000	9210000	1	1.05	1.18	1.17	8030000	9250000	1	1.15	39587
2541	O43347|MSI1H_HUMAN	3.01	234.04	3700000	3800000	4070000	4170000	1	1.03	1.1	1.13	3750000	4120000	1	1.1	39125
1125	O15240|VGF_HUMAN	3.01	212.79	3690000	3610000	3940000	4080000	1	0.98	1.07	1.11	3650000	4010000	1	1.1	67258
1717	Q92542|NICA_HUMAN	3.01	179.03	6230000	6100000	5620000	5610000	1	0.98	0.9	0.9	6160000	5610000	1	0.91	78411
2482	P36959|GMPR1_HUMAN	3.01	145.23	418000	417000	358000	357000	1	1	0.86	0.86	417000	357000	1	0.86	37419
3885	O75096|LRP4_HUMAN	3.01	142.87	417000	430000	395000	360000	1	1.03	0.95	0.86	423000	377000	1	0.89	212044
3740	Q96K21|ANCHR_HUMAN	3.01	137.18	2510000	2410000	2850000	2550000	1	0.96	1.14	1.02	2460000	2700000	1	1.1	51546
1848	Q9NZT2|OGFR_HUMAN	3	175.81	2320000	2380000	2650000	2550000	1	1.03	1.14	1.1	2350000	2600000	1	1.11	73325
2666	Q92845|KIFA3_HUMAN	3	167.75	2530000	2560000	2800000	2800000	1	1.01	1.1	1.11	2550000	2800000	1	1.1	91205
2589	P18031|PTN1_HUMAN	3	154.18	2080000	2370000	2450000	2430000	1	1.14	1.18	1.17	2220000	2440000	1	1.1	49967
2790	Q9NVP1|DDX18_HUMAN	3	125.2	2170000	2190000	2540000	2520000	1	1.01	1.17	1.16	2180000	2530000	1	1.16	75407
4467	Q14031|CO4A6_HUMAN	3	104.22	1400000	1490000	972000	1060000	1	1.07	0.7	0.76	1450000	1020000	1	0.7	163806
2763	Q9P015|RM15_HUMAN	2.99	161.65	3460000	3360000	3790000	3700000	1	0.97	1.09	1.07	3410000	3740000	1	1.1	33420
6720	P63098|CANB1_HUMAN	2.99	123.83	2560000	2430000	2120000	1960000	1	0.95	0.83	0.77	2490000	2040000	1	0.82	19300
3356	Q96JG8|MAGD4_HUMAN	2.99	115.14	1010000	1030000	1210000	1160000	1	1.02	1.19	1.15	1020000	1180000	1	1.16	81378
4400	P41586|PACR_HUMAN	2.99	95.86	2720000	2780000	2330000	2320000	1	1.02	0.86	0.85	2750000	2320000	1	0.84	53314
969	P04040|CATA_HUMAN	2.98	307.48	25900000	24400000	23400000	22400000	1	0.94	0.91	0.87	25200000	22900000	1	0.91	59756
1341	P60891|PRPS1_HUMAN	2.98	276.36	8930000	8800000	9880000	9570000	1	0.99	1.11	1.07	8860000	9720000	1	1.1	34834
678	Q3KQU3|MA7D1_HUMAN	2.98	226.92	10500000	10700000	11700000	11600000	1	1.02	1.11	1.1	10600000	11600000	1	1.1	92820
2107	Q86XA9|HTR5A_HUMAN	2.98	147.54	2710000	2750000	2310000	2350000	1	1.01	0.85	0.87	2730000	2330000	1	0.86	222002
5308	A5PKW4|PSD1_HUMAN	2.98	92.05	619000	602000	873000	872000	1	0.97	1.41	1.41	611000	873000	1	1.43	109543
1016	Q9UJW0|DCTN4_HUMAN	2.97	283.44	13400000	13500000	14900000	14600000	1	1.01	1.12	1.09	13400000	14800000	1	1.1	52337
1499	Q16527|CSRP2_HUMAN	2.97	236.78	6640000	6810000	6090000	6180000	1	1.03	0.92	0.93	6730000	6130000	1	0.91	20954
2973	Q99873|ANM1_HUMAN	2.97	215.23	9880000	9880000	8950000	9060000	1	1	0.91	0.92	9880000	9000000	1	0.91	41516
1552	P25685|DNJB1_HUMAN	2.97	200.58	17900000	17700000	19700000	19200000	1	0.99	1.1	1.08	17800000	19500000	1	1.1	38044
2250	Q9H3H3|CK068_HUMAN	2.97	195.84	5420000	5380000	4920000	4920000	1	0.99	0.91	0.91	5400000	4920000	1	0.91	27355
2314	Q5TH69|BIG3_HUMAN	2.97	178.56	1690000	1670000	1870000	1880000	1	0.99	1.11	1.11	1680000	1870000	1	1.12	240649
4314	P62256|UBE2H_HUMAN	2.97	90.78	1580000	1510000	1360000	1380000	1	0.96	0.86	0.88	1540000	1370000	1	0.89	20655
11	P50395|GDIB_HUMAN	2.96	380.57	44400000	44900000	49200000	48800000	1	1.01	1.11	1.1	44600000	49000000	1	1.1	50663
2509	Q9NRV9|HEBP1_HUMAN	2.96	168.92	4540000	4660000	4240000	4150000	1	1.03	0.93	0.91	4600000	4190000	1	0.91	21097
3496	Q1L5Z9|LONF2_HUMAN	2.96	131.71	562000	610000	651000	680000	1	1.09	1.16	1.21	586000	665000	1	1.14	83654
945	O75400|PR40A_HUMAN	2.95	221.66	10300000	10600000	11500000	11400000	1	1.03	1.12	1.11	10500000	11500000	1	1.1	108805
1007	Q8WWY3|PRP31_HUMAN	2.95	217.38	6710000	6880000	7450000	7450000	1	1.03	1.11	1.11	6800000	7450000	1	1.1	55456
2398	Q16774|KGUA_HUMAN	2.95	171.06	3030000	3100000	2780000	2820000	1	1.02	0.92	0.93	3070000	2800000	1	0.91	21726
2168	Q9UPR0|PLCL2_HUMAN	2.95	168.21	3740000	3760000	4180000	4150000	1	1	1.12	1.11	3750000	4170000	1	1.11	125866
3133	Q32MZ4|LRRF1_HUMAN	2.94	142.48	790000	819000	914000	857000	1	1.04	1.16	1.09	804000	886000	1	1.1	89253
537	Q8TDJ6|DMXL2_HUMAN	2.93	274	7390000	7470000	8220000	8070000	1	1.01	1.11	1.09	7430000	8140000	1	1.1	339642
1541	Q9BTU6|P4K2A_HUMAN	2.93	191.16	2350000	2310000	2590000	2520000	1	0.98	1.1	1.07	2330000	2550000	1	1.1	54022
1594	Q6P1J9|CDC73_HUMAN	2.93	173.5	1980000	2020000	2200000	2190000	1	1.02	1.11	1.1	2000000	2200000	1	1.1	60577
2642	Q96BJ3|AIDA_HUMAN	2.93	147.69	2630000	2740000	2900000	2990000	1	1.04	1.1	1.13	2690000	2940000	1	1.1	35023
4223	O76081|RGS20_HUMAN	2.93	102.77	1490000	1560000	1290000	1280000	1	1.05	0.87	0.86	1530000	1290000	1	0.84	43692
9949	Q16568|CART_HUMAN	2.93	69.37	827000	798000	337000	337000	1	0.96	0.41	0.41	812000	337000	1	0.41	12829
961	P21397|AOFA_HUMAN	2.92	269.88	11900000	11400000	10600000	10700000	1	0.96	0.89	0.9	11700000	10600000	1	0.91	59682
1456	P62979|RS27A_HUMAN	2.92	259.09	9050000	5900000	6110000	10300000	1	0.65	0.68	1.13	7470000	8190000	1	1.1	17965
695	P17655|CAN2_HUMAN	2.92	252.67	14800000	14900000	13800000	13300000	1	1	0.93	0.89	14800000	13600000	1	0.91	79995
1163	P58107|EPIPL_HUMAN	2.92	252.12	1200000	1200000	1080000	1110000	1	0.99	0.9	0.92	1200000	1090000	1	0.91	555629
2238	Q16186|ADRM1_HUMAN	2.92	217.14	12200000	11800000	11000000	10900000	1	0.96	0.9	0.9	12000000	10900000	1	0.91	42153
2239	Q86UW7|CAPS2_HUMAN	2.92	190.06	1280000	1330000	1120000	1120000	1	1.04	0.88	0.87	1300000	1120000	1	0.86	147734
3834	Q9NQ79|CRAC1_HUMAN	2.92	117.79	1090000	1140000	1270000	1260000	1	1.05	1.17	1.16	1110000	1270000	1	1.14	71421
619	O75037|KI21B_HUMAN	2.91	278.75	11800000	12500000	12400000	14200000	1	1.07	1.05	1.21	12100000	13300000	1	1.1	182661
4025	P62857|RS28_HUMAN	2.91	227.41	4470000	4510000	4980000	4860000	1	1.01	1.11	1.09	4490000	4920000	1	1.1	7841
1362	Q9UNW9|NOVA2_HUMAN	2.91	213	8590000	8140000	9540000	8780000	1	0.95	1.11	1.02	8370000	9160000	1	1.1	49009
745	Q9NV70|EXOC1_HUMAN	2.91	212.84	15800000	16000000	17300000	17600000	1	1.01	1.09	1.11	15900000	17400000	1	1.1	101982
661	Q96KP4|CNDP2_HUMAN	2.9	320.42	40600000	40600000	37100000	37000000	1	1	0.91	0.91	40600000	37100000	1	0.91	52879
1834	Q13492|PICAL_HUMAN	2.9	223.55	2900000	3070000	2710000	2740000	1	1.06	0.93	0.95	2980000	2730000	1	0.91	70755
2221	P11532|DMD_HUMAN	2.9	218.52	3160000	3250000	2900000	2950000	1	1.03	0.92	0.93	3200000	2930000	1	0.91	426751
3631	Q9H0E3|SP130_HUMAN	2.9	158.18	890000	862000	780000	820000	1	0.97	0.88	0.92	876000	800000	1	0.91	110324
548	Q9NRY4|RHG35_HUMAN	2.89	274.33	7350000	7480000	8220000	8010000	1	1.02	1.12	1.09	7410000	8120000	1	1.09	170513
1191	Q8IWW6|RHG12_HUMAN	2.89	259.77	7730000	7440000	7140000	6720000	1	0.96	0.92	0.87	7590000	6930000	1	0.91	96254
1053	Q9UJ70|NAGK_HUMAN	2.89	240.6	8320000	8310000	7580000	7600000	1	1	0.91	0.91	8310000	7590000	1	0.91	37376
2594	Q07021|C1QBP_HUMAN	2.89	225.53	8330000	8250000	9210000	8950000	1	0.99	1.11	1.07	8290000	9080000	1	1.09	31362
3445	Q92581|SL9A6_HUMAN	2.89	120.36	1580000	1580000	1870000	1730000	1	1	1.19	1.09	1580000	1800000	1	1.14	74162
991	P36873|PP1G_HUMAN	2.88	252.99	1720000	1740000	2350000	2250000	1	1.01	1.37	1.31	1730000	2300000	1	1.33	36984
1713	Q9UEW8|STK39_HUMAN	2.88	230.43	9950000	9980000	8640000	9570000	1	1	0.87	0.96	9960000	9100000	1	0.91	59474
1632	P39748|FEN1_HUMAN	2.88	219.26	9350000	9510000	10200000	10400000	1	1.02	1.1	1.11	9430000	10300000	1	1.09	42593
1028	Q9H1B7|I2BPL_HUMAN	2.88	207.16	10400000	10500000	11600000	11200000	1	1	1.12	1.08	10500000	11400000	1	1.09	82659
3463	Q8IZQ5|SELH_HUMAN	2.88	183.74	4670000	4480000	5150000	4860000	1	0.96	1.1	1.04	4580000	5010000	1	1.09	13453
2028	Q9BZJ0|CRNL1_HUMAN	2.88	167.28	3810000	3660000	4180000	4090000	1	0.96	1.1	1.07	3740000	4130000	1	1.11	100452
4802	Q9NU22|MDN1_HUMAN	2.88	149.14	2440000	2590000	2170000	2200000	1	1.06	0.89	0.9	2510000	2190000	1	0.87	632827
6347	Q9GZP9|DERL2_HUMAN	2.88	116.91	4740000	4800000	5830000	5600000	1	1.01	1.23	1.18	4770000	5710000	1	1.2	27567
7491	Q9UHA4|LTOR3_HUMAN	2.88	115.38	1480000	1630000	1160000	1300000	1	1.1	0.79	0.88	1560000	1230000	1	0.79	13623
419	Q15811|ITSN1_HUMAN	2.87	305.86	32400000	30500000	29200000	28300000	1	0.94	0.9	0.87	31500000	28800000	1	0.91	195420
3007	P49427|UB2R1_HUMAN	2.87	154.26	2970000	2930000	3250000	3220000	1	0.99	1.09	1.08	2950000	3230000	1	1.09	26737
3118	Q8TF05|PP4R1_HUMAN	2.86	177.04	1090000	1180000	1210000	1270000	1	1.08	1.11	1.17	1130000	1240000	1	1.09	107004
203	Q12888|TP53B_HUMAN	2.85	369.54	26200000	26600000	28800000	28900000	1	1.02	1.1	1.11	26400000	28900000	1	1.09	213573
1347	Q13595|TRA2A_HUMAN	2.85	212.99	4210000	4350000	4680000	4680000	1	1.03	1.11	1.11	4280000	4680000	1	1.09	32689
1528	Q16836|HCDH_HUMAN	2.85	185.84	12100000	11900000	13100000	13100000	1	0.98	1.08	1.08	12000000	13100000	1	1.09	34294
135	P13591|NCAM1_HUMAN	2.84	389.76	186000000	190000000	200000000	211000000	1	1.02	1.08	1.14	188000000	206000000	1	1.09	94574
685	P27448|MARK3_HUMAN	2.84	242.6	4080000	3990000	4510000	4310000	1	0.98	1.11	1.06	4040000	4410000	1	1.09	84489
1026	Q9H4M9|EHD1_HUMAN	2.84	231.87	6830000	6780000	7290000	7590000	1	0.99	1.07	1.11	6810000	7440000	1	1.09	60627
1159	Q9UPQ0|LIMC1_HUMAN	2.84	198.82	5880000	5920000	5430000	5360000	1	1.01	0.92	0.91	5900000	5400000	1	0.91	121867
2169	Q9Y295|DRG1_HUMAN	2.84	156.33	2000000	2040000	2250000	2230000	1	1.02	1.13	1.12	2020000	2240000	1	1.11	40542
3125	Q9NW82|WDR70_HUMAN	2.84	124.39	1860000	1980000	2100000	2260000	1	1.07	1.13	1.22	1920000	2180000	1	1.14	73201
3957	Q06547|GABP1_HUMAN	2.84	112.37	850000	913000	1020000	983000	1	1.07	1.2	1.16	882000	1000000	1	1.14	42483
3566	Q9Y385|UB2J1_HUMAN	2.84	102.85	1080000	1030000	1290000	1200000	1	0.96	1.19	1.11	1060000	1240000	1	1.18	35199
686	Q5SSJ5|HP1B3_HUMAN	2.83	303.06	30800000	31900000	32600000	36000000	1	1.04	1.06	1.17	31400000	34300000	1	1.09	61207
1311	Q13151|ROA0_HUMAN	2.83	271.2	21500000	22200000	24400000	23300000	1	1.03	1.13	1.08	21800000	23900000	1	1.09	30841
1205	Q9BWF3|RBM4_HUMAN	2.83	222.71	832000	858000	957000	943000	1	1.03	1.15	1.13	845000	950000	1	1.12	40314
1582	O00560|SDCB1_HUMAN	2.82	255.88	3810000	4020000	3500000	3660000	1	1.06	0.92	0.96	3910000	3580000	1	0.91	32444
1753	Q9HA64|KT3K_HUMAN	2.82	191.88	8550000	8270000	6940000	8450000	1	0.97	0.81	0.99	8410000	7690000	1	0.92	34412
2858	Q9Y303|NAGA_HUMAN	2.82	132.13	2190000	2230000	1980000	1960000	1	1.02	0.91	0.9	2210000	1970000	1	0.89	43748
288	O60716|CTND1_HUMAN	2.81	311.77	23300000	23800000	25900000	25500000	1	1.02	1.11	1.09	23500000	25700000	1	1.09	108170
1008	P50213|IDH3A_HUMAN	2.81	245.16	19600000	19500000	17900000	17900000	1	0.99	0.91	0.91	19500000	17900000	1	0.92	39592
1049	Q15042|RB3GP_HUMAN	2.81	215.63	7050000	7060000	7960000	7470000	1	1	1.13	1.06	7060000	7710000	1	1.09	110524
2019	P30566|PUR8_HUMAN	2.81	199.14	6590000	6700000	5940000	6230000	1	1.02	0.9	0.95	6650000	6080000	1	0.92	54889
3836	O94915|FRYL_HUMAN	2.81	143.17	1730000	1720000	1480000	1530000	1	1	0.86	0.88	1730000	1510000	1	0.87	339598
3333	P56524|HDAC4_HUMAN	2.81	138.71	1970000	1920000	2240000	2130000	1	0.97	1.13	1.08	1950000	2180000	1	1.12	119040
4219	Q9H0X4|F234A_HUMAN	2.81	127.39	286000	320000	323000	340000	1	1.12	1.13	1.19	303000	332000	1	1.09	59660
644	O75044|SRGP2_HUMAN	2.8	226.85	7780000	7950000	8680000	8510000	1	1.02	1.12	1.09	7870000	8590000	1	1.09	120880
2017	Q16798|MAON_HUMAN	2.8	214.78	4970000	5010000	5550000	5350000	1	1.01	1.12	1.08	4990000	5450000	1	1.09	67069
1570	Q9NZN3|EHD3_HUMAN	2.8	208.53	1780000	1970000	1670000	1770000	1	1.11	0.94	0.99	1880000	1720000	1	0.92	60887
973	P49790|NU153_HUMAN	2.8	206.13	4880000	4740000	5450000	5050000	1	0.97	1.12	1.04	4810000	5250000	1	1.09	153938
1407	Q8WXF7|ATLA1_HUMAN	2.8	203.21	11700000	11600000	12900000	12700000	1	0.99	1.1	1.08	11700000	12800000	1	1.09	63544
3454	Q13114|TRAF3_HUMAN	2.8	136.11	729000	733000	821000	809000	1	1.01	1.13	1.11	731000	815000	1	1.12	64490
3264	Q9UJY5|GGA1_HUMAN	2.8	115.21	2480000	2510000	2890000	2940000	1	1.01	1.17	1.19	2490000	2910000	1	1.17	70384
602	P42025|ACTY_HUMAN	2.79	293.7	7190000	7370000	8140000	7760000	1	1.02	1.13	1.08	7280000	7950000	1	1.09	42293
2072	P62899|RL31_HUMAN	2.79	149.37	6270000	6110000	6640000	7040000	1	0.97	1.06	1.12	6190000	6840000	1	1.1	14463
71	O43707|ACTN4_HUMAN	2.78	378.02	38800000	39300000	35300000	36200000	1	1.01	0.91	0.93	39000000	35700000	1	0.92	104854
277	Q9NSD9|SYFB_HUMAN	2.78	307	37500000	37300000	42000000	39600000	1	1	1.12	1.06	37400000	40800000	1	1.09	66116
807	Q5SQI0|ATAT_HUMAN	2.78	233.08	15700000	15300000	17200000	16600000	1	0.98	1.1	1.06	15500000	16900000	1	1.09	46810
1705	Q8NHP8|PLBL2_HUMAN	2.78	193.62	8870000	8800000	8220000	7970000	1	0.99	0.93	0.9	8830000	8090000	1	0.92	65472
1884	Q96GK7|FAH2A_HUMAN	2.78	190.86	3970000	4000000	3600000	3690000	1	1.01	0.91	0.93	3980000	3650000	1	0.92	34596
2410	Q96Q42|ALS2_HUMAN	2.78	168.88	4580000	4630000	5000000	5060000	1	1.01	1.09	1.1	4610000	5030000	1	1.09	183632
2497	Q9Y3B3|TMED7_HUMAN	2.78	162.8	8600000	8590000	7900000	7850000	1	1	0.92	0.91	8600000	7880000	1	0.92	25172
5310	P32418|NAC1_HUMAN	2.78	140.76	528000	528000	679000	660000	1	1	1.28	1.25	528000	669000	1	1.27	108547
721	Q13308|PTK7_HUMAN	2.77	267.41	8170000	8050000	9130000	8570000	1	0.99	1.12	1.05	8110000	8850000	1	1.09	118392
1781	P61353|RL27_HUMAN	2.77	237.63	26400000	26000000	29000000	28200000	1	0.98	1.1	1.07	26200000	28600000	1	1.09	15798
2501	Q01970|PLCB3_HUMAN	2.77	209.78	1120000	1140000	1240000	1220000	1	1.02	1.11	1.09	1130000	1230000	1	1.09	138799
1380	Q6P6C2|ALKB5_HUMAN	2.77	189.04	4380000	4420000	4880000	4730000	1	1.01	1.11	1.08	4400000	4800000	1	1.09	44256
2320	P51151|RAB9A_HUMAN	2.77	177.62	783000	829000	754000	724000	1	1.06	0.96	0.92	806000	739000	1	0.92	22838
3854	O96005|CLPT1_HUMAN	2.77	147.38	4960000	4900000	4520000	4520000	1	0.99	0.91	0.91	4930000	4520000	1	0.92	76097
45	P15311|EZRI_HUMAN	2.76	370.16	81700000	82500000	73600000	76900000	1	1.01	0.9	0.94	82100000	75200000	1	0.92	69413
612	P51991|ROA3_HUMAN	2.76	330.18	50700000	52800000	55800000	57200000	1	1.04	1.1	1.13	51800000	56500000	1	1.09	39595
168	P35611|ADDA_HUMAN	2.76	321.75	35400000	36200000	33000000	32600000	1	1.02	0.93	0.92	35800000	32800000	1	0.92	80955
1299	P26583|HMGB2_HUMAN	2.76	228.4	16700000	17400000	18400000	18900000	1	1.04	1.1	1.13	17100000	18700000	1	1.09	24034
1490	Q9BY44|EIF2A_HUMAN	2.76	208.82	8480000	8900000	9460000	9500000	1	1.05	1.12	1.12	8690000	9480000	1	1.09	64990
3775	Q9H074|PAIP1_HUMAN	2.76	127.5	918000	910000	689000	671000	1	0.99	0.75	0.73	914000	680000	1	0.74	53525
3540	Q5KU26|COL12_HUMAN	2.76	122.06	1370000	1440000	1200000	1230000	1	1.05	0.88	0.9	1400000	1220000	1	0.87	81515
3536	Q9UQ13|SHOC2_HUMAN	2.76	111.6	1850000	1780000	2160000	1960000	1	0.96	1.16	1.06	1810000	2060000	1	1.13	64888
1290	Q9P2S2|NRX2A_HUMAN	2.75	183.15	2540000	2610000	3020000	2780000	1	1.03	1.19	1.09	2580000	2900000	1	1.12	184981
1382	P28161|GSTM2_HUMAN	2.75	179.29	5220000	4990000	4540000	4640000	1	0.96	0.87	0.89	5100000	4590000	1	0.9	25745
709	O75475|PSIP1_HUMAN	2.74	272.73	16900000	16900000	18400000	18400000	1	1	1.09	1.09	16900000	18400000	1	1.09	60103
852	P26196|DDX6_HUMAN	2.74	268.91	17300000	17300000	19200000	18500000	1	1	1.11	1.07	17300000	18900000	1	1.09	54417
3232	Q96N66|MBOA7_HUMAN	2.74	217.78	2490000	2570000	2290000	2350000	1	1.03	0.92	0.94	2530000	2320000	1	0.92	52765
2794	Q86V81|THOC4_HUMAN	2.74	197.53	2640000	2790000	2990000	2930000	1	1.06	1.13	1.11	2710000	2960000	1	1.09	26888
2387	Q99567|NUP88_HUMAN	2.74	192.01	4070000	4160000	4500000	4470000	1	1.02	1.11	1.1	4110000	4490000	1	1.09	83542
2639	P17405|ASM_HUMAN	2.74	144.4	2310000	2280000	2550000	2510000	1	0.99	1.1	1.09	2300000	2530000	1	1.1	69752
2454	O60331|PI51C_HUMAN	2.73	235.27	2270000	2320000	2520000	2490000	1	1.02	1.11	1.1	2300000	2500000	1	1.09	73260
2869	Q8TC26|TM163_HUMAN	2.73	207.41	2910000	3000000	2710000	2720000	1	1.03	0.93	0.93	2960000	2710000	1	0.92	31469
2265	Q16620|NTRK2_HUMAN	2.73	192.86	6590000	6550000	6130000	5930000	1	0.99	0.93	0.9	6570000	6030000	1	0.92	91999
3088	Q92692|NECT2_HUMAN	2.73	123.3	5190000	5240000	5910000	5730000	1	1.01	1.14	1.1	5220000	5820000	1	1.12	57742
4496	P54829|PTN5_HUMAN	2.73	100.39	917000	849000	784000	681000	1	0.93	0.85	0.74	883000	732000	1	0.83	63538
2987	O15511|ARPC5_HUMAN	2.72	184.16	4410000	4220000	4750000	4660000	1	0.96	1.08	1.06	4320000	4700000	1	1.09	16320
2309	Q15059|BRD3_HUMAN	2.72	175.97	2630000	2590000	2860000	2830000	1	0.99	1.09	1.08	2610000	2840000	1	1.09	79542
3475	Q14919|NC2A_HUMAN	2.72	125.7	2520000	2530000	2900000	2830000	1	1	1.15	1.12	2530000	2860000	1	1.13	22350
372	P49750|YLPM1_HUMAN	2.71	267.24	9160000	9260000	10100000	9960000	1	1.01	1.1	1.09	9210000	10000000	1	1.09	219983
2022	P18887|XRCC1_HUMAN	2.71	221.71	7000000	7150000	7680000	7740000	1	1.02	1.1	1.11	7070000	7710000	1	1.09	69477
3080	P09914|IFIT1_HUMAN	2.71	154	940000	984000	866000	900000	1	1.05	0.92	0.96	962000	883000	1	0.92	55360
2444	P40938|RFC3_HUMAN	2.71	139.53	1680000	1770000	1960000	1970000	1	1.05	1.16	1.17	1730000	1960000	1	1.14	40556
326	P43686|PRS6B_HUMAN	2.7	340.84	33800000	35500000	37600000	37800000	1	1.05	1.11	1.12	34600000	37700000	1	1.09	47366
1484	Q14118|DAG1_HUMAN	2.7	218.48	8970000	9050000	8270000	8270000	1	1.01	0.92	0.92	9010000	8270000	1	0.92	97441
1140	Q14558|KPRA_HUMAN	2.7	215.91	5520000	5460000	6160000	5790000	1	0.99	1.12	1.05	5490000	5980000	1	1.09	39394
2186	Q7L5N1|CSN6_HUMAN	2.7	191.42	7900000	7730000	7150000	7200000	1	0.98	0.9	0.91	7810000	7170000	1	0.92	36163
3474	P07902|GALT_HUMAN	2.7	132.86	639000	650000	585000	586000	1	1.02	0.91	0.92	645000	585000	1	0.91	43363
3275	O15145|ARPC3_HUMAN	2.7	132.57	5850000	5690000	6470000	6470000	1	0.97	1.11	1.11	5770000	6470000	1	1.12	20547
3794	Q8IV36|HID1_HUMAN	2.7	112.81	1500000	1540000	1740000	1670000	1	1.03	1.16	1.12	1520000	1710000	1	1.12	88745
954	P31942|HNRH3_HUMAN	2.69	274.97	21900000	22600000	24400000	24100000	1	1.03	1.11	1.1	22200000	24200000	1	1.09	36926
1162	O43615|TIM44_HUMAN	2.69	238	13300000	13300000	12100000	12300000	1	1	0.91	0.92	13300000	12200000	1	0.92	51356
822	Q99829|CPNE1_HUMAN	2.69	223.27	30300000	30600000	28000000	27900000	1	1.01	0.93	0.92	30400000	27900000	1	0.92	59059
2318	P52758|UK114_HUMAN	2.69	197.29	8530000	8600000	7980000	7750000	1	1.01	0.94	0.91	8560000	7860000	1	0.92	14494
2658	Q14353|GAMT_HUMAN	2.68	189.3	5660000	5560000	6170000	6040000	1	0.98	1.09	1.07	5610000	6110000	1	1.09	26318
2517	Q95604|1C17_HUMAN	2.68	184.56	1340000	1310000	1730000	1670000	1	0.98	1.29	1.25	1330000	1700000	1	1.28	41238
2967	O75340|PDCD6_HUMAN	2.68	149.03	5710000	5700000	5210000	5130000	1	1	0.91	0.9	5700000	5170000	1	0.91	21868
3257	Q5TCY1|TTBK1_HUMAN	2.68	133.75	453000	449000	520000	490000	1	0.99	1.15	1.08	451000	505000	1	1.12	142737
3876	P49069|CAMLG_HUMAN	2.68	131.66	789000	849000	845000	938000	1	1.08	1.07	1.19	819000	892000	1	1.09	32953
4207	Q9H2H8|PPIL3_HUMAN	2.68	121.4	5630000	6070000	6210000	6520000	1	1.08	1.1	1.16	5850000	6370000	1	1.09	18155
857	P40925|MDHC_HUMAN	2.67	322.18	68700000	70800000	62000000	66100000	1	1.03	0.9	0.96	69700000	64000000	1	0.92	36426
905	Q5JPE7|NOMO2_HUMAN	2.67	213.75	719000	697000	303000	313000	1	0.97	0.42	0.43	708000	308000	1	0.43	139439
1924	P07741|APT_HUMAN	2.67	206.75	7220000	7300000	6710000	6630000	1	1.01	0.93	0.92	7260000	6670000	1	0.92	19608
1936	Q86WB0|NIPA_HUMAN	2.67	173.64	3190000	3210000	3630000	3340000	1	1	1.14	1.05	3200000	3480000	1	1.09	55262
2138	Q5M775|CYTSB_HUMAN	2.67	163.16	2840000	2710000	2550000	2510000	1	0.95	0.9	0.88	2780000	2530000	1	0.91	118585
3022	Q8NFD5|ARI1B_HUMAN	2.67	149.87	776000	726000	881000	802000	1	0.94	1.14	1.03	751000	841000	1	1.12	236121
2824	Q9BTE6|AASD1_HUMAN	2.67	149.19	2810000	2760000	3180000	2920000	1	0.98	1.13	1.04	2790000	3050000	1	1.09	45480
4194	Q2PPJ7|RGPA2_HUMAN	2.67	143.95	133000	142000	183000	187000	1	1.06	1.38	1.41	137000	185000	1	1.35	210768
589	P62140|PP1B_HUMAN	2.66	267.12	8640000	8850000	9440000	9590000	1	1.02	1.09	1.11	8750000	9520000	1	1.09	37187
4084	P20962|PTMS_HUMAN	2.66	157.13	40200000	39800000	44000000	43100000	1	0.99	1.09	1.07	40000000	43600000	1	1.09	11530
2446	O15460|P4HA2_HUMAN	2.66	128.98	2100000	1980000	2340000	2330000	1	0.94	1.12	1.11	2040000	2340000	1	1.15	60902
4635	Q9BVP2|GNL3_HUMAN	2.66	116.36	1520000	1500000	1730000	1730000	1	0.99	1.14	1.14	1510000	1730000	1	1.15	61993
902	P31689|DNJA1_HUMAN	2.65	285.3	12600000	12700000	14000000	13600000	1	1	1.11	1.07	12700000	13800000	1	1.09	44868
993	Q99439|CNN2_HUMAN	2.65	219.46	8220000	7980000	8900000	8710000	1	0.97	1.08	1.06	8100000	8810000	1	1.09	33697
1271	O14974|MYPT1_HUMAN	2.65	201.71	3850000	4230000	3440000	3980000	1	1.1	0.89	1.03	4040000	3710000	1	0.92	115281
1947	P28070|PSB4_HUMAN	2.65	197.65	14400000	14100000	13300000	12900000	1	0.98	0.92	0.9	14200000	13100000	1	0.92	29204
2489	O75663|TIPRL_HUMAN	2.65	194.74	8130000	8320000	8840000	9050000	1	1.02	1.09	1.11	8220000	8950000	1	1.09	31444
1945	P09525|ANXA4_HUMAN	2.65	177.61	1530000	1610000	1410000	1470000	1	1.05	0.92	0.96	1570000	1440000	1	0.92	35883
2932	O75947|ATP5H_HUMAN	2.65	158.21	4450000	4530000	4900000	4880000	1	1.02	1.1	1.1	4490000	4890000	1	1.09	18491
7644	P38571|LICH_HUMAN	2.65	77.93	960000	921000	717000	672000	1	0.96	0.75	0.7	940000	694000	1	0.74	45419
923	P09936|UCHL1_HUMAN	2.64	352.67	123000000	123000000	113000000	113000000	1	1	0.92	0.92	123000000	113000000	1	0.92	24824
542	Q96HC4|PDLI5_HUMAN	2.64	273.02	11500000	11800000	10900000	10600000	1	1.02	0.94	0.92	11700000	10700000	1	0.92	63945
448	Q13367|AP3B2_HUMAN	2.64	258.5	9620000	9550000	10600000	10300000	1	0.99	1.1	1.07	9590000	10400000	1	1.09	119059
2192	Q92734|TFG_HUMAN	2.64	192.3	5490000	5480000	5100000	4990000	1	1	0.93	0.91	5490000	5040000	1	0.92	43448
2559	Q9UQN3|CHM2B_HUMAN	2.64	145.27	3360000	3340000	3100000	3020000	1	0.99	0.92	0.9	3350000	3060000	1	0.91	23907
917	P62879|GBB2_HUMAN	2.63	338.15	15400000	15000000	17400000	15700000	1	0.97	1.13	1.02	15200000	16500000	1	1.09	37331
818	P60900|PSA6_HUMAN	2.63	264.64	27700000	28300000	30700000	30200000	1	1.02	1.11	1.09	28000000	30500000	1	1.09	27399
1387	P52907|CAZA1_HUMAN	2.63	258.76	7840000	7790000	8560000	8430000	1	0.99	1.09	1.08	7810000	8500000	1	1.09	32923
2005	Q9NQ88|TIGAR_HUMAN	2.63	194.64	7170000	7190000	6670000	6530000	1	1	0.93	0.91	7180000	6600000	1	0.92	30063
2691	Q9ULV3|CIZ1_HUMAN	2.63	152.39	817000	848000	906000	939000	1	1.04	1.11	1.15	832000	922000	1	1.11	100045
4067	Q96IZ0|PAWR_HUMAN	2.63	143.23	1560000	1580000	1420000	1450000	1	1.01	0.91	0.93	1570000	1430000	1	0.91	36568
3546	Q53EL6|PDCD4_HUMAN	2.63	125.18	1070000	1200000	1270000	1260000	1	1.12	1.19	1.18	1130000	1270000	1	1.12	51735
3729	Q5VTL8|PR38B_HUMAN	2.63	122.06	558000	591000	678000	622000	1	1.06	1.22	1.11	574000	650000	1	1.13	64468
6222	Q15651|HMGN3_HUMAN	2.63	87.07	618000	626000	944000	885000	1	1.01	1.53	1.43	622000	914000	1	1.47	10666
475	Q8TAQ2|SMRC2_HUMAN	2.62	277.21	7630000	7600000	8270000	8290000	1	1	1.08	1.09	7620000	8280000	1	1.09	132879
1303	O00629|IMA3_HUMAN	2.62	238.08	4120000	3860000	4570000	4100000	1	0.94	1.11	1	3990000	4340000	1	1.09	57887
2286	Q14376|GALE_HUMAN	2.62	230.1	6890000	6900000	7620000	7370000	1	1	1.11	1.07	6890000	7500000	1	1.09	38282
2680	Q7L266|ASGL1_HUMAN	2.62	191.14	9320000	9240000	10100000	10100000	1	0.99	1.08	1.08	9280000	10100000	1	1.09	32055
2573	Q9Y2C4|EXOG_HUMAN	2.62	164.01	2150000	2320000	2370000	2490000	1	1.08	1.1	1.16	2240000	2430000	1	1.09	41085
3260	Q9UPY3|DICER_HUMAN	2.62	138.08	469000	468000	549000	532000	1	1	1.17	1.13	468000	540000	1	1.15	218680
3096	Q9UBV8|PEF1_HUMAN	2.62	132.98	3470000	3360000	3130000	3070000	1	0.97	0.9	0.88	3410000	3100000	1	0.91	30381
4293	Q3MHD2|LSM12_HUMAN	2.62	127.17	1170000	1010000	1180000	1190000	1	0.87	1.01	1.02	1090000	1190000	1	1.09	21701
3786	Q969Z0|TBRG4_HUMAN	2.62	117.47	1890000	1940000	1650000	1750000	1	1.03	0.87	0.93	1920000	1700000	1	0.89	70738
1075	Q15717|ELAV1_HUMAN	2.61	273.49	13600000	14100000	14600000	15500000	1	1.03	1.08	1.14	13800000	15000000	1	1.09	36092
897	P39023|RL3_HUMAN	2.61	249.6	60800000	58700000	57500000	72400000	1	0.97	0.95	1.19	59800000	65000000	1	1.09	46109
1447	O00764|PDXK_HUMAN	2.61	222.43	7210000	7300000	6560000	6790000	1	1.01	0.91	0.94	7250000	6680000	1	0.92	35102
1803	Q12929|EPS8_HUMAN	2.61	157.58	3630000	3740000	3280000	3290000	1	1.03	0.9	0.9	3690000	3280000	1	0.89	91882
2521	P28799|GRN_HUMAN	2.61	147.12	4030000	4040000	3590000	3680000	1	1	0.89	0.91	4030000	3640000	1	0.9	63545
4951	Q8IUR7|ARMC8_HUMAN	2.61	106.57	179000	182000	133000	129000	1	1.01	0.74	0.72	180000	131000	1	0.72	75509
4136	O00592|PODXL_HUMAN	2.61	90.13	2650000	2620000	2990000	2960000	1	0.99	1.13	1.12	2640000	2970000	1	1.13	58635
328	P61158|ARP3_HUMAN	2.6	350.86	33000000	33200000	36600000	35300000	1	1.01	1.11	1.07	33100000	36000000	1	1.09	47371
776	P08195|4F2_HUMAN	2.6	276.69	23100000	22600000	25200000	24400000	1	0.98	1.09	1.06	22800000	24800000	1	1.09	67994
2296	Q9NX40|OCAD1_HUMAN	2.6	182.51	5830000	5910000	5430000	5370000	1	1.01	0.93	0.92	5870000	5400000	1	0.92	27626
2280	O75351|VPS4B_HUMAN	2.6	173.59	4060000	4530000	4470000	4990000	1	1.12	1.1	1.23	4290000	4730000	1	1.1	49302
3795	Q8N8N7|PTGR2_HUMAN	2.6	126.77	3620000	3510000	3270000	3290000	1	0.97	0.9	0.91	3560000	3280000	1	0.92	38499
3676	Q9UBK7|RBL2A_HUMAN	2.6	122.23	2720000	2710000	3050000	2840000	1	1	1.12	1.05	2710000	2950000	1	1.09	26115
3689	Q9UNT1|RBL2B_HUMAN	2.6	122.23	2720000	2710000	3050000	2840000	1	1	1.12	1.05	2710000	2950000	1	1.09	26101
2920	Q9BX68|HINT2_HUMAN	2.59	190.79	2890000	2840000	2630000	2640000	1	0.98	0.91	0.91	2860000	2640000	1	0.92	17162
1992	Q9P2P5|HECW2_HUMAN	2.59	179.28	2130000	2120000	1950000	1950000	1	1	0.91	0.91	2130000	1950000	1	0.92	175768
3332	P62330|ARF6_HUMAN	2.59	155.66	2400000	2120000	2090000	2070000	1	0.88	0.87	0.86	2260000	2080000	1	0.92	20082
4047	Q8WWI5|CTL1_HUMAN	2.59	133.75	1770000	1720000	1620000	1590000	1	0.98	0.92	0.9	1740000	1610000	1	0.92	73302
4281	O43424|GRID2_HUMAN	2.59	99.86	996000	966000	735000	667000	1	0.97	0.74	0.67	981000	701000	1	0.71	113356
453	P12236|ADT3_HUMAN	2.58	315.84	16700000	16500000	15600000	15000000	1	0.99	0.93	0.9	16600000	15300000	1	0.92	32866
396	P46379|BAG6_HUMAN	2.58	273.79	11600000	11600000	12800000	12400000	1	1	1.11	1.07	11600000	12600000	1	1.09	119409
912	P61266|STX1B_HUMAN	2.58	232.4	14300000	13900000	13000000	12900000	1	0.97	0.91	0.9	14100000	13000000	1	0.92	33245
3306	O75608|LYPA1_HUMAN	2.58	199.08	2650000	2580000	2880000	2810000	1	0.97	1.08	1.06	2620000	2840000	1	1.09	24670
3989	P02765|FETUA_HUMAN	2.58	160.07	13400000	12900000	12700000	11600000	1	0.97	0.95	0.86	13200000	12100000	1	0.92	39325
4068	Q9UPV9|TRAK1_HUMAN	2.58	125.32	560000	595000	505000	550000	1	1.06	0.9	0.98	577000	527000	1	0.91	106040
107	Q9Y265|RUVB1_HUMAN	2.57	317.33	36300000	36400000	39600000	39300000	1	1	1.09	1.08	36400000	39500000	1	1.09	50228
1152	P55036|PSMD4_HUMAN	2.57	257.83	5950000	6220000	6660000	6550000	1	1.05	1.12	1.1	6080000	6600000	1	1.09	40737
2931	P61086|UBE2K_HUMAN	2.57	204.55	2430000	2490000	2720000	2620000	1	1.03	1.12	1.08	2460000	2670000	1	1.09	22407
2560	O95479|G6PE_HUMAN	2.57	173.38	1090000	1140000	1220000	1200000	1	1.05	1.12	1.11	1110000	1210000	1	1.09	88893
2416	Q8TF42|UBS3B_HUMAN	2.57	150.66	3550000	3430000	3230000	3190000	1	0.97	0.91	0.9	3490000	3210000	1	0.92	72696
460	Q9NQW7|XPP1_HUMAN	2.56	290.51	23300000	23800000	21700000	21800000	1	1.02	0.93	0.93	23600000	21700000	1	0.92	69918
1758	P29966|MARCS_HUMAN	2.56	274.06	36600000	37600000	35000000	33400000	1	1.03	0.96	0.91	37100000	34200000	1	0.92	31555
1118	P04259|K2C6B_HUMAN	2.56	221.31	455000	424000	411000	399000	1	0.93	0.9	0.88	440000	405000	1	0.92	60067
2874	Q9UHD9|UBQL2_HUMAN	2.56	173.65	1310000	1320000	1470000	1390000	1	1.01	1.13	1.06	1310000	1430000	1	1.09	65696
2606	O95182|NDUA7_HUMAN	2.55	177.42	4230000	4320000	4700000	4580000	1	1.02	1.11	1.08	4280000	4640000	1	1.09	12551
3861	Q92797|SYMPK_HUMAN	2.55	175.07	491000	579000	478000	504000	1	1.18	0.97	1.03	535000	491000	1	0.92	141148
3348	Q9BTN0|LRFN3_HUMAN	2.55	156.06	1210000	1300000	1360000	1360000	1	1.08	1.13	1.13	1250000	1360000	1	1.09	66260
4560	Q15397|PUM3_HUMAN	2.55	131.89	408000	385000	520000	498000	1	0.94	1.28	1.22	396000	509000	1	1.29	73584
3644	Q96A35|RM24_HUMAN	2.55	95.54	2540000	2630000	3060000	2970000	1	1.03	1.2	1.17	2590000	3020000	1	1.17	24915
2568	P13073|COX41_HUMAN	2.54	156.45	5430000	5400000	4830000	5160000	1	1	0.89	0.95	5420000	4990000	1	0.92	19577
3049	O43505|B4GA1_HUMAN	2.54	125.91	4640000	4620000	4090000	4180000	1	1	0.88	0.9	4630000	4140000	1	0.89	47119
51	P33176|KINH_HUMAN	2.53	375.09	28200000	28900000	30800000	31100000	1	1.02	1.09	1.1	28500000	31000000	1	1.08	109685
1057	Q9BY77|PDIP3_HUMAN	2.53	208.67	7340000	7220000	7990000	7800000	1	0.98	1.09	1.06	7280000	7900000	1	1.08	46089
1481	Q9NVH0|EXD2_HUMAN	2.53	205.88	2120000	2160000	1960000	1980000	1	1.02	0.93	0.94	2140000	1970000	1	0.92	70353
3224	O43447|PPIH_HUMAN	2.53	131.35	2990000	2910000	3250000	3190000	1	0.97	1.09	1.07	2950000	3220000	1	1.09	19208
851	O95865|DDAH2_HUMAN	2.52	304.05	34900000	36000000	31600000	33700000	1	1.03	0.91	0.97	35500000	32700000	1	0.92	29644
1640	Q96T51|RUFY1_HUMAN	2.52	188.08	2030000	2090000	1890000	1910000	1	1.03	0.93	0.94	2060000	1900000	1	0.92	79818
3825	O43150|ASAP2_HUMAN	2.52	134.72	531000	580000	568000	652000	1	1.09	1.07	1.23	555000	610000	1	1.1	111650
3263	Q27J81|INF2_HUMAN	2.52	134.07	332000	330000	380000	382000	1	0.99	1.14	1.15	331000	381000	1	1.15	135624
2396	Q9Y4D1|DAAM1_HUMAN	2.52	131.83	1130000	1150000	1330000	1340000	1	1.01	1.17	1.19	1140000	1340000	1	1.17	123473
1648	P36405|ARL3_HUMAN	2.51	234.98	13300000	13600000	14700000	14400000	1	1.02	1.11	1.09	13400000	14600000	1	1.08	20456
1984	P11908|PRPS2_HUMAN	2.51	208.37	3210000	3160000	3500000	3410000	1	0.99	1.09	1.06	3190000	3460000	1	1.08	34769
2898	P34059|GALNS_HUMAN	2.51	167.15	2810000	2850000	2630000	2590000	1	1.01	0.93	0.92	2830000	2610000	1	0.92	58026
1899	Q8N3E9|PLCD3_HUMAN	2.51	163.32	2640000	2770000	2370000	2490000	1	1.05	0.9	0.94	2700000	2430000	1	0.9	89258
2213	Q8TCS8|PNPT1_HUMAN	2.51	148.59	6180000	5870000	6930000	6540000	1	0.95	1.12	1.06	6030000	6730000	1	1.12	85951
3223	Q6KCM7|SCMC2_HUMAN	2.51	132.83	792000	839000	909000	885000	1	1.06	1.15	1.12	816000	897000	1	1.1	52663
2802	Q6NUM9|RETST_HUMAN	2.51	116.96	1600000	1660000	1390000	1450000	1	1.04	0.87	0.91	1630000	1420000	1	0.87	66820
4	Q14194|DPYL1_HUMAN	2.5	431.08	93300000	94700000	103000000	101000000	1	1.02	1.1	1.08	94000000	102000000	1	1.08	62184
734	Q12979|ABR_HUMAN	2.49	237.78	5600000	5540000	5250000	5030000	1	0.99	0.94	0.9	5570000	5140000	1	0.92	97598
1265	Q6Y7W6|PERQ2_HUMAN	2.49	233.68	3350000	3430000	3730000	3620000	1	1.02	1.11	1.08	3390000	3670000	1	1.08	150070
2523	Q9P227|RHG23_HUMAN	2.49	171.55	2580000	2550000	2810000	2740000	1	0.99	1.09	1.07	2560000	2780000	1	1.08	162191
99	Q01813|PFKAP_HUMAN	2.48	390.86	64400000	65000000	60200000	59300000	1	1.01	0.93	0.92	64700000	59700000	1	0.92	85596
626	A5YKK6|CNOT1_HUMAN	2.48	245.33	9940000	10200000	10800000	11000000	1	1.03	1.09	1.11	10100000	10900000	1	1.08	266937
2952	O15056|SYNJ2_HUMAN	2.48	156.05	331000	326000	289000	291000	1	0.98	0.87	0.88	329000	290000	1	0.88	165537
3694	O95983|MBD3_HUMAN	2.48	121.98	5400000	4910000	5790000	5470000	1	0.91	1.07	1.01	5150000	5630000	1	1.09	32844
4449	Q9UGI8|TES_HUMAN	2.48	101.79	460000	472000	602000	617000	1	1.03	1.31	1.34	466000	609000	1	1.31	47996
415	Q9ULV4|COR1C_HUMAN	2.47	298.38	36700000	36600000	34100000	33600000	1	1	0.93	0.92	36700000	33900000	1	0.92	53249
1353	Q7Z6L1|TCPR1_HUMAN	2.47	199.95	2480000	2480000	2760000	2610000	1	1	1.11	1.06	2480000	2690000	1	1.08	129696
5020	Q8NG66|NEK11_HUMAN	2.47	68.81	117000	117000	79500	79800	1	1	0.68	0.68	117000	79600	1	0.68	74192
413	P22307|NLTP_HUMAN	2.46	275.69	54300000	52700000	49800000	49000000	1	0.97	0.92	0.9	53500000	49400000	1	0.92	58994
907	O14617|AP3D1_HUMAN	2.46	261.41	13500000	13700000	14600000	14900000	1	1.01	1.08	1.1	13600000	14700000	1	1.08	130158
821	Q9UNH7|SNX6_HUMAN	2.46	253.04	21100000	21300000	22600000	23300000	1	1.01	1.07	1.11	21200000	23000000	1	1.08	46649
1708	Q96RR4|KKCC2_HUMAN	2.46	193.49	3550000	3620000	3880000	3890000	1	1.02	1.09	1.1	3590000	3890000	1	1.08	64746
2362	P20936|RASA1_HUMAN	2.46	187.25	2210000	2260000	2070000	2050000	1	1.02	0.94	0.93	2230000	2060000	1	0.92	116403
3013	Q12907|LMAN2_HUMAN	2.46	179.86	2770000	3010000	2520000	2810000	1	1.09	0.91	1.02	2890000	2670000	1	0.92	40229
3262	Q9Y2H1|ST38L_HUMAN	2.46	127.72	1860000	1880000	1710000	1680000	1	1.01	0.92	0.9	1870000	1700000	1	0.91	54003
3844	Q96RF0|SNX18_HUMAN	2.46	126.53	1930000	1940000	1810000	1760000	1	1.01	0.94	0.91	1940000	1790000	1	0.92	68895
7792	P56159|GFRA1_HUMAN	2.46	72	134000	135000	288000	291000	1	1.01	2.15	2.17	134000	289000	1	2.15	51456
133	Q12906|ILF3_HUMAN	2.45	363.03	55500000	56000000	61200000	59600000	1	1.01	1.1	1.07	55800000	60400000	1	1.08	95339
218	P23634|AT2B4_HUMAN	2.45	352.43	21000000	21300000	19500000	19700000	1	1.02	0.93	0.94	21200000	19600000	1	0.92	137920
298	Q8IX01|SUGP2_HUMAN	2.45	297.38	17000000	17000000	18500000	18400000	1	1	1.09	1.08	17000000	18400000	1	1.08	120207
992	Q9NTK5|OLA1_HUMAN	2.45	270.48	26900000	25400000	28900000	27700000	1	0.95	1.08	1.03	26200000	28300000	1	1.08	44744
1634	Q96CN7|ISOC1_HUMAN	2.45	227.06	7760000	7570000	7130000	7030000	1	0.97	0.92	0.91	7660000	7080000	1	0.92	32237
3202	P59190|RAB15_HUMAN	2.45	140.07	923000	981000	1130000	1080000	1	1.06	1.22	1.17	952000	1100000	1	1.16	24391
3687	Q8NEZ5|FBX22_HUMAN	2.45	125.35	1850000	1820000	2010000	2020000	1	0.98	1.09	1.09	1840000	2020000	1	1.1	44508
3988	Q9UEU0|VTI1B_HUMAN	2.45	96.08	424000	451000	384000	378000	1	1.06	0.9	0.89	438000	381000	1	0.87	26688
498	Q9NY65|TBA8_HUMAN	2.44	429.14	517000	518000	667000	627000	1	1	1.29	1.21	518000	647000	1	1.25	50094
1074	P20340|RAB6A_HUMAN	2.44	234.81	3600000	3570000	3240000	3310000	1	0.99	0.9	0.92	3590000	3280000	1	0.91	23593
2090	O43598|DNPH1_HUMAN	2.44	205.43	4120000	4240000	3880000	3840000	1	1.03	0.94	0.93	4180000	3860000	1	0.92	19108
3548	Q9UJD0|RIMS3_HUMAN	2.44	118.03	1170000	1210000	1300000	1360000	1	1.04	1.11	1.16	1190000	1330000	1	1.11	32796
4063	Q13426|XRCC4_HUMAN	2.44	97.77	2660000	2670000	3050000	3060000	1	1	1.15	1.15	2660000	3050000	1	1.15	38287
146	Q92499|DDX1_HUMAN	2.43	325.32	36600000	38500000	33600000	35800000	1	1.05	0.92	0.98	37600000	34700000	1	0.92	82432
3112	O75915|PRAF3_HUMAN	2.43	161.44	5990000	6050000	5490000	5640000	1	1.01	0.92	0.94	6020000	5560000	1	0.92	21615
5107	Q8WU79|SMAP2_HUMAN	2.43	61.67	2000000	1870000	2800000	2580000	1	0.93	1.4	1.29	1940000	2690000	1	1.39	46786
127	O00429|DNM1L_HUMAN	2.42	351.28	29300000	29700000	32100000	31800000	1	1.01	1.09	1.08	29500000	31900000	1	1.08	81877
421	P10636|TAU_HUMAN	2.42	292.06	62300000	64600000	67000000	70300000	1	1.04	1.08	1.13	63400000	68600000	1	1.08	78928
621	Q13011|ECH1_HUMAN	2.42	288.44	17000000	16800000	15900000	15300000	1	0.99	0.94	0.9	16900000	15600000	1	0.92	35816
2393	P49407|ARRB1_HUMAN	2.42	223.69	1610000	1640000	1740000	1770000	1	1.02	1.08	1.1	1620000	1750000	1	1.08	47066
1105	Q8IYI6|EXOC8_HUMAN	2.42	209.41	8940000	8910000	9780000	9520000	1	1	1.09	1.06	8920000	9650000	1	1.08	81799
191	P35222|CTNB1_HUMAN	2.41	301.33	29300000	29100000	26800000	27200000	1	0.99	0.91	0.93	29200000	27000000	1	0.92	85497
494	P49792|RBP2_HUMAN	2.41	291.72	6030000	6570000	6520000	7100000	1	1.09	1.08	1.18	6300000	6810000	1	1.08	358201
994	P46926|GNPI1_HUMAN	2.41	246.87	14700000	14400000	16000000	15400000	1	0.98	1.09	1.05	14600000	15700000	1	1.08	32669
2946	Q9Y3E1|HDGR3_HUMAN	2.41	170.17	5340000	5440000	5860000	5790000	1	1.02	1.1	1.08	5390000	5830000	1	1.08	22620
3429	Q9NZ94|NLGN3_HUMAN	2.41	138.99	331000	345000	356000	378000	1	1.04	1.08	1.14	338000	367000	1	1.09	93895
1847	Q8NBF2|NHLC2_HUMAN	2.4	208.3	4670000	4370000	4940000	4820000	1	0.94	1.06	1.03	4520000	4880000	1	1.08	79444
3369	P26367|PAX6_HUMAN	2.4	143.94	2140000	2230000	2050000	2000000	1	1.04	0.95	0.93	2190000	2020000	1	0.93	46683
3162	P12694|ODBA_HUMAN	2.4	143.67	2210000	2380000	2150000	2090000	1	1.08	0.97	0.95	2290000	2120000	1	0.93	50471
3963	O43678|NDUA2_HUMAN	2.4	128.44	1560000	1600000	1690000	1720000	1	1.02	1.08	1.1	1580000	1700000	1	1.08	10922
4509	Q9ULJ8|NEB1_HUMAN	2.4	103.09	319000	308000	420000	416000	1	0.96	1.32	1.3	314000	418000	1	1.33	123342
3427	Q93097|WNT2B_HUMAN	2.4	101.94	900000	920000	669000	683000	1	1.02	0.74	0.76	910000	676000	1	0.74	43770
2050	P24666|PPAC_HUMAN	2.39	243.57	8340000	8150000	8910000	8910000	1	0.98	1.07	1.07	8250000	8910000	1	1.08	18042
3495	Q9BYD6|RM01_HUMAN	2.39	144.81	1760000	1780000	1930000	1880000	1	1.01	1.1	1.07	1770000	1910000	1	1.08	36909
3165	Q8IY33|MILK2_HUMAN	2.39	130.06	1210000	1210000	1320000	1370000	1	1	1.09	1.13	1210000	1340000	1	1.11	97502
3960	Q9UJ83|HACL1_HUMAN	2.39	120.56	1820000	1700000	1950000	1880000	1	0.94	1.07	1.04	1760000	1920000	1	1.09	63729
2440	P08240|SRPRA_HUMAN	2.38	192.31	2070000	2070000	2220000	2250000	1	1	1.07	1.09	2070000	2240000	1	1.08	69811
3072	O95071|UBR5_HUMAN	2.38	168.37	6530000	6480000	7180000	6950000	1	0.99	1.1	1.07	6500000	7070000	1	1.09	309352
1722	O00232|PSD12_HUMAN	2.38	159.62	3070000	3130000	3380000	3450000	1	1.02	1.1	1.12	3100000	3420000	1	1.1	52904
2155	Q9P270|SLAI2_HUMAN	2.38	151.63	1520000	1530000	1740000	1650000	1	1	1.14	1.08	1530000	1690000	1	1.11	62543
3051	P10589|COT1_HUMAN	2.38	136.77	399000	401000	546000	550000	1	1	1.37	1.38	400000	548000	1	1.37	46156
2708	P51687|SUOX_HUMAN	2.38	125.26	2200000	2260000	2030000	2000000	1	1.03	0.92	0.91	2230000	2010000	1	0.9	60283
225	Q15393|SF3B3_HUMAN	2.37	329.87	32300000	32000000	34900000	34600000	1	0.99	1.08	1.07	32200000	34700000	1	1.08	135577
2113	Q8N126|CADM3_HUMAN	2.37	233.56	7780000	7970000	7260000	7320000	1	1.03	0.93	0.94	7870000	7290000	1	0.93	43300
856	Q14344|GNA13_HUMAN	2.37	215.71	11000000	11300000	10200000	10400000	1	1.03	0.93	0.95	11100000	10300000	1	0.93	44050
2857	Q9UGV2|NDRG3_HUMAN	2.37	198.89	7210000	7110000	6610000	6650000	1	0.99	0.92	0.92	7160000	6630000	1	0.93	41409
1832	P27987|IP3KB_HUMAN	2.37	159.09	3570000	3570000	3260000	3210000	1	1	0.91	0.9	3570000	3240000	1	0.91	102376
2584	P21127|CD11B_HUMAN	2.37	126.42	1580000	1630000	1830000	1810000	1	1.04	1.16	1.15	1600000	1820000	1	1.14	92707
4296	Q9BPX3|CND3_HUMAN	2.37	116.54	194000	203000	435000	400000	1	1.05	2.24	2.06	199000	417000	1	2.1	114334
571	P61163|ACTZ_HUMAN	2.36	344.09	19200000	19900000	21000000	21200000	1	1.03	1.09	1.1	19600000	21100000	1	1.08	42614
171	Q9UQE7|SMC3_HUMAN	2.36	330.39	37100000	37700000	40100000	40700000	1	1.01	1.08	1.1	37400000	40400000	1	1.08	141541
743	P62820|RAB1A_HUMAN	2.36	300.54	12000000	12000000	13100000	12900000	1	1	1.09	1.07	12000000	13000000	1	1.08	22678
465	Q9NSK0|KLC4_HUMAN	2.36	246.57	4570000	4830000	4990000	5150000	1	1.06	1.09	1.13	4700000	5070000	1	1.08	68640
1819	O95319|CELF2_HUMAN	2.36	200.61	4140000	4090000	4420000	4470000	1	0.99	1.07	1.08	4120000	4440000	1	1.08	54285
2968	Q9BRQ6|MIC25_HUMAN	2.36	162.6	3540000	3540000	3750000	3900000	1	1	1.06	1.1	3540000	3820000	1	1.08	26458
2570	Q6UN15|FIP1_HUMAN	2.36	156.5	507000	526000	614000	574000	1	1.04	1.21	1.13	516000	594000	1	1.15	66526
1345	Q96ME7|ZN512_HUMAN	2.35	241.4	7100000	7190000	7690000	7730000	1	1.01	1.08	1.09	7140000	7710000	1	1.08	64682
3568	P05387|RLA2_HUMAN	2.35	216.62	13200000	13500000	14400000	14400000	1	1.03	1.1	1.09	13300000	14400000	1	1.08	11665
1420	P55263|ADK_HUMAN	2.34	236.23	11000000	11400000	10400000	10300000	1	1.04	0.95	0.94	11200000	10400000	1	0.93	40545
3762	O14672|ADA10_HUMAN	2.34	134.85	1040000	1100000	1130000	1210000	1	1.05	1.08	1.16	1070000	1170000	1	1.09	84142
960	Q12905|ILF2_HUMAN	2.33	266.33	10200000	10400000	11200000	11000000	1	1.02	1.1	1.08	10300000	11100000	1	1.08	43062
786	Q96PK6|RBM14_HUMAN	2.33	256.54	10200000	10200000	10900000	11100000	1	1	1.07	1.09	10200000	11000000	1	1.08	69492
2641	Q9Y653|AGRG1_HUMAN	2.33	213.39	3930000	4020000	4310000	4270000	1	1.02	1.1	1.09	3980000	4290000	1	1.08	77738
775	Q9Y496|KIF3A_HUMAN	2.33	213.22	4890000	4750000	5360000	5040000	1	0.97	1.1	1.03	4820000	5200000	1	1.08	80041
3891	Q9H7B4|SMYD3_HUMAN	2.33	109.81	1040000	1010000	1130000	1130000	1	0.97	1.1	1.09	1020000	1130000	1	1.11	49097
9484	Q6SPF0|SAMD1_HUMAN	2.33	49.3	1700000	666000	2090000	2860000	1	0.39	1.23	1.68	1180000	2480000	1	2.09	56052
463	P30876|RPB2_HUMAN	2.32	270.95	11300000	11200000	12600000	11800000	1	0.99	1.11	1.04	11300000	12200000	1	1.08	133896
1104	O00192|ARVC_HUMAN	2.32	204.59	3730000	3830000	3500000	3500000	1	1.03	0.94	0.94	3780000	3500000	1	0.93	104642
936	Q01968|OCRL_HUMAN	2.32	201.34	11500000	10900000	12500000	11900000	1	0.95	1.09	1.03	11200000	12200000	1	1.08	104205
1912	Q99615|DNJC7_HUMAN	2.32	183.22	3760000	4100000	4280000	4290000	1	1.09	1.14	1.14	3930000	4280000	1	1.09	56441
2689	P08397|HEM3_HUMAN	2.32	151.4	3710000	3770000	4170000	3940000	1	1.02	1.12	1.06	3740000	4050000	1	1.08	39330
3764	O15121|DEGS1_HUMAN	2.32	138.69	1520000	1560000	1440000	1410000	1	1.03	0.95	0.93	1540000	1420000	1	0.93	37866
4498	P14209|CD99_HUMAN	2.32	123.92	2420000	2450000	2190000	1790000	1	1.01	0.91	0.74	2430000	1990000	1	0.82	18848
3600	A8K855|EFCB7_HUMAN	2.32	121.85	1030000	1020000	1190000	1080000	1	0.99	1.15	1.05	1030000	1140000	1	1.11	71981
4451	P04156|PRIO_HUMAN	2.32	105.42	2040000	2060000	1580000	1660000	1	1.01	0.77	0.81	2050000	1620000	1	0.79	27661
3856	P51580|TPMT_HUMAN	2.32	99.11	2870000	2870000	2520000	2540000	1	1	0.88	0.88	2870000	2530000	1	0.88	28180
5724	Q9UIF9|BAZ2A_HUMAN	2.32	84.31	113000	110000	159000	145000	1	0.98	1.41	1.29	111000	152000	1	1.37	211196
311	P35573|GDE_HUMAN	2.31	296.52	24000000	24300000	22700000	22100000	1	1.01	0.95	0.92	24100000	22400000	1	0.93	174763
809	O15355|PPM1G_HUMAN	2.31	229.58	6560000	6740000	7320000	7020000	1	1.03	1.12	1.07	6650000	7170000	1	1.08	59272
1763	P06756|ITAV_HUMAN	2.31	172.4	5970000	5980000	6550000	6340000	1	1	1.1	1.06	5970000	6440000	1	1.08	116038
2695	P82650|RT22_HUMAN	2.31	156.03	2990000	2980000	3220000	3230000	1	1	1.07	1.08	2990000	3220000	1	1.08	41280
3087	Q9Y4W2|LAS1L_HUMAN	2.31	149.18	2470000	2450000	2640000	2670000	1	0.99	1.07	1.08	2460000	2650000	1	1.08	83065
2742	O15498|YKT6_HUMAN	2.31	130.34	3520000	3630000	3180000	3270000	1	1.03	0.9	0.93	3570000	3220000	1	0.9	22418
6127	Q9NX58|LYAR_HUMAN	2.31	87.46	1750000	1470000	2100000	2150000	1	0.84	1.2	1.23	1610000	2130000	1	1.32	43615
334	P22234|PUR6_HUMAN	2.3	297.25	48000000	48200000	52600000	51100000	1	1	1.1	1.07	48100000	51900000	1	1.08	47079
751	O00154|BACH_HUMAN	2.3	267.99	22200000	22900000	24100000	24600000	1	1.03	1.08	1.11	22500000	24300000	1	1.08	41796
1414	P47985|UCRI_HUMAN	2.3	227.9	10600000	10300000	11500000	11000000	1	0.97	1.09	1.04	10400000	11200000	1	1.08	29668
1215	Q9Y2H0|DLGP4_HUMAN	2.3	222.01	7180000	7400000	7840000	7880000	1	1.03	1.09	1.1	7290000	7860000	1	1.08	108012
1700	P28066|PSA5_HUMAN	2.3	219.86	9980000	10700000	10800000	11500000	1	1.07	1.08	1.15	10300000	11100000	1	1.08	26411
3827	O94875|SRBS2_HUMAN	2.3	181.78	1660000	1740000	1840000	1830000	1	1.05	1.11	1.1	1700000	1830000	1	1.08	124107
2061	Q8IVT5|KSR1_HUMAN	2.3	167.12	2400000	2380000	2620000	2520000	1	0.99	1.09	1.05	2390000	2570000	1	1.08	102160
3449	tr|H0YC42|H0YC42_HUMAN	2.3	132.35	555000	546000	705000	676000	1	0.98	1.27	1.22	550000	690000	1	1.26	31170
6580	Q96D05|CJ035_HUMAN	2.3	98.92	959000	975000	1070000	1070000	1	1.02	1.12	1.12	967000	1070000	1	1.11	13238
672	Q3ZCM7|TBB8_HUMAN	2.29	334.7	5890000	5850000	8420000	7370000	1	0.99	1.43	1.25	5870000	7890000	1	1.34	49776
1559	Q15056|IF4H_HUMAN	2.29	230.15	30500000	30700000	27700000	29100000	1	1.01	0.91	0.96	30600000	28400000	1	0.93	27385
2202	Q8WW12|PCNP_HUMAN	2.29	215.9	7930000	8180000	8720000	8630000	1	1.03	1.1	1.09	8050000	8680000	1	1.08	18925
896	Q13617|CUL2_HUMAN	2.29	203.25	16600000	16600000	17900000	17900000	1	1	1.08	1.07	16600000	17900000	1	1.08	86983
1669	P11117|PPAL_HUMAN	2.29	178.43	6280000	6190000	5890000	5680000	1	0.99	0.94	0.9	6230000	5780000	1	0.93	48344
2133	O75688|PPM1B_HUMAN	2.29	177.33	1450000	1520000	1620000	1640000	1	1.04	1.11	1.13	1480000	1630000	1	1.09	52643
2431	Q9UPW8|UN13A_HUMAN	2.29	169.85	1490000	1490000	1610000	1620000	1	1	1.08	1.09	1490000	1620000	1	1.09	193013
3882	Q6ZUT9|DEN5B_HUMAN	2.29	125.16	1710000	1750000	1890000	1920000	1	1.02	1.1	1.12	1730000	1900000	1	1.1	145019
4375	P09001|RM03_HUMAN	2.29	117.46	822000	831000	980000	1110000	1	1.01	1.19	1.35	826000	1040000	1	1.26	38633
353	P13798|ACPH_HUMAN	2.28	304.28	24100000	23800000	22200000	22300000	1	0.99	0.92	0.93	24000000	22300000	1	0.93	81225
971	O95373|IPO7_HUMAN	2.28	254.88	12300000	12200000	13300000	13200000	1	0.99	1.08	1.07	12300000	13200000	1	1.08	119516
1777	Q9HCU4|CELR2_HUMAN	2.28	219.12	1820000	1860000	2010000	1950000	1	1.02	1.1	1.07	1840000	1980000	1	1.08	317453
2601	Q8TB36|GDAP1_HUMAN	2.28	194.88	8490000	8470000	9290000	8970000	1	1	1.09	1.06	8480000	9130000	1	1.08	41346
1820	Q9NXG2|THUM1_HUMAN	2.28	172.57	4100000	4050000	4440000	4350000	1	0.99	1.08	1.06	4080000	4390000	1	1.08	39315
3121	Q96CM8|ACSF2_HUMAN	2.28	160.9	3200000	3270000	2980000	3030000	1	1.02	0.93	0.95	3240000	3010000	1	0.93	68125
2826	Q7L2J0|MEPCE_HUMAN	2.28	129.08	1790000	1820000	2020000	2020000	1	1.01	1.13	1.13	1810000	2020000	1	1.12	74355
3261	Q9BV44|THUM3_HUMAN	2.28	112.05	1010000	1000000	1150000	1110000	1	1	1.14	1.11	1000000	1130000	1	1.12	57003
972	Q6ZMI0|PPR21_HUMAN	2.27	221.59	5790000	5830000	6260000	6250000	1	1.01	1.08	1.08	5810000	6260000	1	1.08	88314
2733	P53990|IST1_HUMAN	2.27	183.43	6700000	6450000	6180000	6040000	1	0.96	0.92	0.9	6580000	6110000	1	0.93	39751
3511	Q07889|SOS1_HUMAN	2.27	183.13	1060000	1100000	1180000	1140000	1	1.04	1.12	1.08	1080000	1160000	1	1.08	152463
2640	P54725|RD23A_HUMAN	2.27	161.23	3850000	3980000	3590000	3690000	1	1.03	0.93	0.96	3920000	3640000	1	0.93	39609
2259	Q9NZJ7|MTCH1_HUMAN	2.27	146.15	3860000	3740000	3540000	3440000	1	0.97	0.92	0.89	3800000	3490000	1	0.92	41544
3581	Q9H299|SH3L3_HUMAN	2.27	142.43	964000	960000	1030000	1050000	1	1	1.06	1.09	962000	1040000	1	1.08	10438
423	Q9NTI5|PDS5B_HUMAN	2.26	278.93	10200000	10100000	11200000	10700000	1	0.98	1.09	1.04	10200000	10900000	1	1.08	164666
375	P11717|MPRI_HUMAN	2.26	270.87	11500000	12100000	12700000	12700000	1	1.06	1.11	1.11	11800000	12700000	1	1.08	274373
1208	Q5JWF2|GNAS1_HUMAN	2.26	252.2	17200000	17400000	16300000	15800000	1	1.01	0.95	0.92	17300000	16100000	1	0.93	111024
1545	Q9Y2D4|EXC6B_HUMAN	2.26	212.5	3910000	4000000	4260000	4270000	1	1.02	1.09	1.09	3960000	4260000	1	1.08	94201
1385	Q86Y82|STX12_HUMAN	2.26	206	10500000	10400000	9810000	9580000	1	0.98	0.93	0.91	10400000	9700000	1	0.93	31642
2055	Q92625|ANS1A_HUMAN	2.26	181.52	5240000	5350000	4970000	4870000	1	1.02	0.95	0.93	5300000	4920000	1	0.93	123108
3221	Q9NXV6|CARF_HUMAN	2.26	165.77	1510000	1500000	1600000	1650000	1	0.99	1.06	1.09	1510000	1620000	1	1.08	61125
3401	Q7Z6L0|PRRT2_HUMAN	2.26	135.24	1580000	1640000	1710000	1770000	1	1.04	1.08	1.12	1610000	1740000	1	1.08	34945
3273	Q96I25|SPF45_HUMAN	2.26	123.65	923000	932000	1060000	1040000	1	1.01	1.15	1.12	928000	1050000	1	1.13	44962
4617	Q9BUL5|PHF23_HUMAN	2.26	117.07	678000	715000	752000	797000	1	1.05	1.11	1.17	696000	774000	1	1.11	43818
87	O95757|HS74L_HUMAN	2.25	343.86	40800000	40500000	43600000	43900000	1	0.99	1.07	1.08	40600000	43700000	1	1.08	94512
308	P12270|TPR_HUMAN	2.25	331.19	36300000	37300000	39400000	39900000	1	1.03	1.08	1.1	36800000	39600000	1	1.08	267290
1199	P08865|RSSA_HUMAN	2.25	294.93	18900000	19100000	20800000	20100000	1	1.01	1.1	1.06	19000000	20500000	1	1.08	32854
1686	Q9Y696|CLIC4_HUMAN	2.25	209.76	7120000	7420000	7980000	7680000	1	1.04	1.12	1.08	7270000	7830000	1	1.08	28772
1670	Q8TDQ7|GNPI2_HUMAN	2.25	181.1	1590000	1610000	1480000	1490000	1	1.01	0.93	0.93	1600000	1480000	1	0.92	31085
2546	P36551|HEM6_HUMAN	2.24	162.21	3230000	3250000	3470000	3500000	1	1.01	1.07	1.08	3240000	3490000	1	1.08	50152
3081	P62837|UB2D2_HUMAN	2.24	129.13	180000	169000	377000	339000	1	0.94	2.1	1.88	175000	358000	1	2.05	16735
4429	Q9UGL1|KDM5B_HUMAN	2.24	126.93	748000	742000	984000	912000	1	0.99	1.32	1.22	745000	948000	1	1.27	175657
815	P52597|HNRPF_HUMAN	2.23	287.43	19500000	19700000	21100000	21100000	1	1.01	1.08	1.08	19600000	21100000	1	1.08	45672
1151	Q00796|DHSO_HUMAN	2.23	239.43	13200000	13700000	12400000	12600000	1	1.03	0.94	0.95	13500000	12500000	1	0.93	38325
1397	P48506|GSH1_HUMAN	2.23	213.61	8570000	8640000	7960000	8040000	1	1.01	0.93	0.94	8610000	8000000	1	0.93	72766
1368	P33240|CSTF2_HUMAN	2.23	178.49	2800000	2880000	3100000	3010000	1	1.03	1.11	1.07	2840000	3050000	1	1.08	60959
1772	O43583|DENR_HUMAN	2.23	176.74	8110000	8250000	8890000	8720000	1	1.02	1.1	1.08	8180000	8800000	1	1.08	22092
2653	Q8NAT1|PMGT2_HUMAN	2.23	167.13	1370000	1390000	1300000	1260000	1	1.01	0.95	0.92	1380000	1280000	1	0.93	66615
3288	P61927|RL37_HUMAN	2.23	105.02	5320000	5290000	4820000	4450000	1	1	0.91	0.84	5300000	4630000	1	0.87	11078
842	P45880|VDAC2_HUMAN	2.22	341.33	83600000	83300000	78300000	76900000	1	1	0.94	0.92	83400000	77600000	1	0.93	31567
1251	Q9HB71|CYBP_HUMAN	2.22	239.57	29900000	30000000	30900000	33600000	1	1	1.03	1.12	30000000	32200000	1	1.08	26210
2036	Q969R2|OSBP2_HUMAN	2.22	163.36	793000	809000	687000	735000	1	1.02	0.87	0.93	801000	711000	1	0.89	101266
3509	Q53H96|P5CR3_HUMAN	2.22	138.6	1960000	1910000	2120000	2100000	1	0.98	1.08	1.07	1930000	2110000	1	1.09	28663
3530	Q9NWB7|IFT57_HUMAN	2.22	111.13	828000	835000	977000	907000	1	1.01	1.18	1.1	831000	942000	1	1.13	49108
6428	Q6UX53|MET7B_HUMAN	2.22	93.92	1460000	1480000	1130000	1150000	1	1.02	0.78	0.79	1470000	1140000	1	0.78	27775
429	O15371|EIF3D_HUMAN	2.21	308.96	13100000	13200000	14000000	14300000	1	1.01	1.07	1.09	13100000	14100000	1	1.08	63973
424	O43295|SRGP3_HUMAN	2.21	270.33	7860000	7970000	8520000	8500000	1	1.01	1.08	1.08	7920000	8510000	1	1.08	124504
871	Q5JRA6|MIA3_HUMAN	2.21	226.24	5810000	5900000	6370000	6230000	1	1.02	1.1	1.07	5860000	6300000	1	1.08	213700
1432	Q68D91|MBLC2_HUMAN	2.21	191.24	6290000	5940000	6620000	6540000	1	0.94	1.05	1.04	6120000	6580000	1	1.08	31372
2532	Q9NX62|IMPA3_HUMAN	2.21	178.75	3760000	3670000	3900000	4090000	1	0.98	1.04	1.09	3720000	4000000	1	1.08	38681
5655	O43395|PRPF3_HUMAN	2.21	109.41	1930000	1820000	2400000	2310000	1	0.94	1.24	1.19	1880000	2350000	1	1.25	77529
5103	P27544|CERS1_HUMAN	2.21	105.33	1470000	1440000	1380000	1290000	1	0.98	0.94	0.88	1450000	1340000	1	0.92	39536
5481	Q96CU9|FXRD1_HUMAN	2.21	99.56	743000	826000	698000	743000	1	1.11	0.94	1	784000	720000	1	0.92	53812
5746	O14683|P5I11_HUMAN	2.21	83.78	1030000	1080000	1520000	1290000	1	1.04	1.47	1.25	1060000	1410000	1	1.33	21054
49	P31323|KAP3_HUMAN	2.2	320.96	31800000	31400000	34400000	33600000	1	0.99	1.08	1.06	31600000	34000000	1	1.08	46302
443	O14980|XPO1_HUMAN	2.2	293.18	24500000	24200000	26500000	25800000	1	0.98	1.08	1.05	24400000	26200000	1	1.07	123386
941	P23284|PPIB_HUMAN	2.2	288.03	51300000	51000000	55900000	54100000	1	0.99	1.09	1.05	51200000	55000000	1	1.07	23743
2540	P78536|ADA17_HUMAN	2.2	150.66	1260000	1220000	1220000	1070000	1	0.97	0.97	0.85	1240000	1150000	1	0.92	93021
3119	Q9NZN8|CNOT2_HUMAN	2.2	142.45	1010000	1050000	1090000	1150000	1	1.05	1.08	1.14	1030000	1120000	1	1.08	59738
4397	P63272|SPT4H_HUMAN	2.2	128.33	4560000	4320000	4900000	4650000	1	0.95	1.07	1.02	4440000	4770000	1	1.08	13193
408	Q15019|SEPT2_HUMAN	2.19	312.23	27700000	28100000	25800000	26200000	1	1.01	0.93	0.94	27900000	26000000	1	0.93	41487
441	Q96HN2|SAHH3_HUMAN	2.19	267.63	8010000	8050000	7600000	7350000	1	1.01	0.95	0.92	8030000	7470000	1	0.93	66721
3344	Q13459|MYO9B_HUMAN	2.19	170.44	658000	686000	613000	637000	1	1.04	0.93	0.97	672000	625000	1	0.93	243398
2472	Q9NTG7|SIR3_HUMAN	2.19	164.23	3340000	3240000	3030000	3090000	1	0.97	0.91	0.92	3290000	3060000	1	0.93	43573
2592	P11172|UMPS_HUMAN	2.19	148.1	4740000	4790000	5230000	5010000	1	1.01	1.1	1.06	4770000	5120000	1	1.07	52222
3934	O60237|MYPT2_HUMAN	2.19	120.86	233000	256000	217000	227000	1	1.1	0.93	0.97	245000	222000	1	0.91	110404
7006	P28676|GRAN_HUMAN	2.19	97.06	1670000	1580000	2110000	1940000	1	0.95	1.26	1.17	1630000	2020000	1	1.25	24010
38	P50991|TCPD_HUMAN	2.18	343.62	93600000	92900000	102000000	98500000	1	0.99	1.09	1.05	93300000	100000000	1	1.07	57924
461	P16435|NCPR_HUMAN	2.18	302.95	16400000	16300000	17900000	17300000	1	0.99	1.09	1.05	16400000	17600000	1	1.07	76690
361	Q00341|VIGLN_HUMAN	2.18	290.96	29000000	28300000	31200000	30200000	1	0.98	1.08	1.04	28600000	30700000	1	1.07	141455
650	O60749|SNX2_HUMAN	2.18	236.15	21700000	21400000	20000000	20000000	1	0.98	0.92	0.92	21500000	20000000	1	0.93	58471
1876	Q9BW92|SYTM_HUMAN	2.18	178.41	2000000	2000000	2190000	2110000	1	1	1.09	1.05	2000000	2150000	1	1.07	81036
4064	A6NCE7|MP3B2_HUMAN	2.18	169.19	4470000	4720000	4900000	5010000	1	1.06	1.09	1.12	4600000	4960000	1	1.08	14628
4083	Q9GZQ8|MLP3B_HUMAN	2.18	169.19	4470000	4720000	4900000	5010000	1	1.06	1.09	1.12	4600000	4960000	1	1.08	14688
2757	O94813|SLIT2_HUMAN	2.18	158.36	379000	377000	346000	340000	1	0.99	0.91	0.9	378000	343000	1	0.91	169869
2775	Q92466|DDB2_HUMAN	2.18	147.59	1570000	1660000	1750000	1780000	1	1.05	1.11	1.13	1610000	1760000	1	1.09	47864
6098	P16455|MGMT_HUMAN	2.18	123.75	507000	508000	624000	608000	1	1	1.23	1.2	507000	616000	1	1.21	21646
3961	P49593|PPM1F_HUMAN	2.18	122.29	1320000	1350000	1440000	1440000	1	1.02	1.09	1.09	1340000	1440000	1	1.07	49831
39	Q9BUF5|TBB6_HUMAN	2.17	411.09	38100000	33100000	38500000	38000000	1	0.87	1.01	1	35600000	38300000	1	1.07	49857
1034	P27695|APEX1_HUMAN	2.17	266.39	37400000	36700000	38800000	40700000	1	0.98	1.04	1.09	37000000	39800000	1	1.07	35555
892	O14818|PSA7_HUMAN	2.17	257.69	21200000	21300000	19900000	19600000	1	1	0.94	0.93	21200000	19800000	1	0.93	27887
1045	P52948|NUP98_HUMAN	2.17	229.45	9820000	10000000	10700000	10600000	1	1.02	1.09	1.08	9920000	10700000	1	1.07	197578
1679	Q8TD30|ALAT2_HUMAN	2.17	195.53	7450000	7840000	6150000	8090000	1	1.05	0.83	1.09	7650000	7120000	1	0.93	57904
1672	Q8IXT5|RB12B_HUMAN	2.17	181.29	4380000	4600000	4890000	4770000	1	1.05	1.11	1.09	4490000	4830000	1	1.07	118103
4138	Q16850|CP51A_HUMAN	2.17	125.91	1820000	1880000	1690000	1760000	1	1.04	0.93	0.97	1850000	1720000	1	0.93	56806
4211	Q9H7P6|MB12B_HUMAN	2.17	125.4	1460000	1510000	1600000	1590000	1	1.04	1.1	1.09	1490000	1600000	1	1.07	35620
2871	Q68EM7|RHG17_HUMAN	2.17	120.8	1080000	1170000	1010000	998000	1	1.08	0.94	0.93	1120000	1000000	1	0.89	95437
3785	P23025|XPA_HUMAN	2.17	118.51	585000	596000	733000	770000	1	1.02	1.25	1.32	590000	752000	1	1.27	31368
4132	Q96FX7|TRM61_HUMAN	2.17	100.63	1280000	1310000	1410000	1470000	1	1.03	1.1	1.15	1300000	1440000	1	1.11	31382
248	P23588|IF4B_HUMAN	2.16	317.22	26100000	26200000	28300000	27900000	1	1	1.08	1.07	26200000	28100000	1	1.07	69151
680	P05198|IF2A_HUMAN	2.16	291.02	20000000	20000000	22000000	21000000	1	1	1.1	1.05	20000000	21500000	1	1.07	36112
2042	Q9BY67|CADM1_HUMAN	2.16	187.65	5080000	5130000	5600000	5350000	1	1.01	1.1	1.05	5100000	5480000	1	1.07	48509
3283	O94779|CNTN5_HUMAN	2.16	113.94	2530000	2590000	2240000	2260000	1	1.02	0.89	0.89	2560000	2250000	1	0.88	120686
7742	Q9Y2R0|COA3_HUMAN	2.16	64.39	898000	698000	396000	406000	1	0.78	0.44	0.45	798000	401000	1	0.5	11731
164	Q05193|DYN1_HUMAN	2.15	337.84	12200000	12200000	13100000	13100000	1	1	1.07	1.07	12200000	13100000	1	1.07	97408
977	O00499|BIN1_HUMAN	2.15	227.39	9510000	8790000	9990000	9650000	1	0.92	1.05	1.01	9150000	9820000	1	1.07	64699
2655	O95714|HERC2_HUMAN	2.15	190.87	1280000	1290000	1380000	1390000	1	1.01	1.08	1.09	1290000	1390000	1	1.08	527234
3363	Q9Y2I1|NISCH_HUMAN	2.15	162.6	2650000	2570000	2820000	2780000	1	0.97	1.06	1.05	2610000	2800000	1	1.07	166628
3148	O75832|PSD10_HUMAN	2.15	157.54	1700000	1690000	1840000	1800000	1	1	1.09	1.06	1690000	1820000	1	1.07	24428
3955	Q96B54|ZN428_HUMAN	2.15	136.4	1030000	1040000	1100000	1130000	1	1.01	1.06	1.1	1040000	1110000	1	1.07	20481
1226	Q96QR8|PURB_HUMAN	2.14	243.91	9900000	9670000	9240000	8990000	1	0.98	0.93	0.91	9790000	9120000	1	0.93	33241
2071	P45983|MK08_HUMAN	2.14	189.25	1280000	1350000	1540000	1560000	1	1.05	1.2	1.21	1310000	1550000	1	1.18	48296
2360	Q9UHC6|CNTP2_HUMAN	2.14	154.78	5710000	5890000	6400000	6230000	1	1.03	1.12	1.09	5800000	6310000	1	1.09	148167
3180	Q15345|LRC41_HUMAN	2.14	133.02	1100000	1130000	1210000	1210000	1	1.03	1.1	1.1	1120000	1210000	1	1.08	88650
3417	Q9BQE5|APOL2_HUMAN	2.14	123.04	1130000	1170000	1310000	1220000	1	1.03	1.16	1.08	1150000	1260000	1	1.1	37092
2274	P15259|PGAM2_HUMAN	2.13	212.11	1670000	1660000	1410000	1380000	1	1	0.85	0.83	1670000	1390000	1	0.84	28766
2842	Q13480|GAB1_HUMAN	2.13	195.66	1320000	1400000	1250000	1280000	1	1.06	0.95	0.98	1360000	1260000	1	0.93	76616
1869	Q5T5U3|RHG21_HUMAN	2.13	194.78	1910000	1990000	2090000	2100000	1	1.04	1.09	1.1	1950000	2090000	1	1.07	217329
1441	O00186|STXB3_HUMAN	2.13	181.14	6730000	6700000	6330000	6170000	1	1	0.94	0.92	6710000	6250000	1	0.93	67764
2889	tr|B4DLN1|B4DLN1_HUMAN	2.13	142.91	1650000	1580000	1820000	1700000	1	0.96	1.1	1.03	1620000	1760000	1	1.09	48099
4830	Q9BT25|HAUS8_HUMAN	2.13	105.77	381000	413000	517000	498000	1	1.08	1.36	1.31	397000	508000	1	1.28	44857
3598	Q99784|NOE1_HUMAN	2.13	100.17	1310000	1340000	1470000	1510000	1	1.02	1.12	1.16	1320000	1490000	1	1.13	55343
111	Q03252|LMNB2_HUMAN	2.12	362.32	54400000	55400000	58700000	59000000	1	1.02	1.08	1.09	54900000	58900000	1	1.07	69948
676	Q9H9A6|LRC40_HUMAN	2.12	242.19	12900000	13000000	14000000	13700000	1	1.01	1.09	1.06	12900000	13900000	1	1.07	68250
1909	Q9H0C8|ILKAP_HUMAN	2.12	168.57	2490000	2480000	2680000	2650000	1	0.99	1.08	1.06	2490000	2670000	1	1.07	42907
3613	Q9Y2U8|MAN1_HUMAN	2.12	164.31	973000	1080000	1050000	1150000	1	1.11	1.08	1.18	1030000	1100000	1	1.07	99997
4758	Q9NQT5|EXOS3_HUMAN	2.12	91.16	498000	549000	638000	699000	1	1.1	1.28	1.41	523000	669000	1	1.28	29572
446	P55060|XPO2_HUMAN	2.11	285.11	17200000	17500000	18900000	18400000	1	1.02	1.09	1.07	17400000	18600000	1	1.07	110417
1983	O43815|STRN_HUMAN	2.11	164.84	2350000	2410000	2640000	2530000	1	1.03	1.13	1.08	2380000	2590000	1	1.09	86132
4666	Q96B26|EXOS8_HUMAN	2.11	81.4	1340000	1340000	1510000	1570000	1	1	1.12	1.17	1340000	1540000	1	1.15	30040
226	P46940|IQGA1_HUMAN	2.1	343.29	35400000	35600000	33400000	32800000	1	1	0.94	0.93	35500000	33100000	1	0.93	189251
2098	Q9Y2Z0|SGT1_HUMAN	2.1	221.6	7530000	7720000	8150000	8200000	1	1.02	1.08	1.09	7620000	8170000	1	1.07	41024
1174	Q15435|PP1R7_HUMAN	2.1	218.65	23100000	22400000	24900000	23800000	1	0.97	1.08	1.03	22700000	24400000	1	1.07	41564
1068	P20042|IF2B_HUMAN	2.1	213.59	11800000	11800000	13100000	12300000	1	1	1.11	1.03	11800000	12700000	1	1.07	38388
120	Q9UDT6|CLIP2_HUMAN	2.09	378.74	49100000	50200000	45800000	46900000	1	1.02	0.93	0.95	49600000	46300000	1	0.93	115837
543	P13645|K1C10_HUMAN	2.09	260.73	17800000	17600000	18800000	19100000	1	0.99	1.06	1.08	17700000	19000000	1	1.07	58827
1989	A1L020|MEX3A_HUMAN	2.09	166.6	2810000	2980000	2600000	2800000	1	1.06	0.93	1	2900000	2700000	1	0.93	54173
3837	P35240|MERL_HUMAN	2.09	110.95	294000	313000	250000	280000	1	1.07	0.85	0.95	304000	265000	1	0.87	69690
6155	Q9NZJ6|COQ3_HUMAN	2.09	83.74	1160000	1100000	879000	871000	1	0.95	0.76	0.75	1130000	875000	1	0.78	41054
411	Q9UHB9|SRP68_HUMAN	2.08	334.12	17900000	18400000	19400000	19600000	1	1.03	1.08	1.09	18200000	19500000	1	1.07	70730
963	Q9UL18|AGO1_HUMAN	2.08	204.82	2850000	2930000	3110000	3150000	1	1.03	1.09	1.1	2890000	3130000	1	1.08	97214
2481	P60660|MYL6_HUMAN	2.08	195.84	10800000	11000000	11900000	11600000	1	1.02	1.09	1.07	10900000	11700000	1	1.07	16930
2785	Q8WUM0|NU133_HUMAN	2.08	154.3	2080000	2110000	2270000	2230000	1	1.01	1.09	1.07	2100000	2250000	1	1.07	128979
2447	Q9BQG0|MBB1A_HUMAN	2.08	153.55	1490000	1480000	1630000	1620000	1	0.99	1.09	1.09	1490000	1620000	1	1.09	148854
3873	Q9BZH6|WDR11_HUMAN	2.08	142.25	825000	819000	739000	757000	1	0.99	0.9	0.92	822000	748000	1	0.91	136685
2358	P78332|RBM6_HUMAN	2.08	136.41	1320000	1400000	1480000	1510000	1	1.06	1.12	1.14	1360000	1500000	1	1.1	128644
4664	O43318|M3K7_HUMAN	2.08	132.3	1460000	1450000	1590000	1530000	1	1	1.09	1.05	1450000	1560000	1	1.07	67196
2933	Q92576|PHF3_HUMAN	2.08	131.1	1670000	1680000	1880000	1880000	1	1.01	1.12	1.13	1670000	1880000	1	1.12	229479
3514	P62760|VISL1_HUMAN	2.08	120.36	1960000	2050000	1800000	1900000	1	1.04	0.92	0.96	2010000	1850000	1	0.92	22142
4011	O75792|RNH2A_HUMAN	2.08	100.88	508000	511000	661000	653000	1	1.01	1.3	1.28	510000	657000	1	1.29	33395
5626	P50895|BCAM_HUMAN	2.08	78	305000	321000	475000	356000	1	1.05	1.56	1.17	313000	415000	1	1.33	67405
1329	P62937|PPIA_HUMAN	2.07	307.25	86900000	85800000	92400000	92600000	1	0.99	1.06	1.07	86300000	92500000	1	1.07	18012
3370	Q9Y5X1|SNX9_HUMAN	2.07	147.3	3870000	4190000	4080000	4560000	1	1.08	1.05	1.18	4030000	4320000	1	1.07	66592
3352	P41221|WNT5A_HUMAN	2.07	126.7	2350000	2290000	2100000	2090000	1	0.97	0.89	0.89	2320000	2100000	1	0.9	42340
4010	Q9BQ39|DDX50_HUMAN	2.07	118.29	1470000	1440000	1900000	1760000	1	0.98	1.29	1.19	1460000	1830000	1	1.26	82565
499	P40123|CAP2_HUMAN	2.06	299.45	18800000	20200000	19000000	17500000	1	1.08	1.01	0.93	19500000	18200000	1	0.93	52824
615	P47897|SYQ_HUMAN	2.06	252.58	15200000	15000000	16400000	15900000	1	0.99	1.08	1.05	15100000	16200000	1	1.07	87799
1601	P16949|STMN1_HUMAN	2.06	220.71	14500000	13800000	15500000	14900000	1	0.95	1.06	1.02	14200000	15200000	1	1.07	17302
3319	Q13315|ATM_HUMAN	2.06	167.09	1360000	1380000	1460000	1500000	1	1.01	1.07	1.1	1370000	1480000	1	1.08	350687
3062	Q7RTV0|PHF5A_HUMAN	2.06	142.13	1840000	1900000	2040000	2030000	1	1.03	1.11	1.1	1870000	2040000	1	1.09	12405
3948	Q8IYR6|TEFF1_HUMAN	2.06	128.2	635000	630000	729000	672000	1	0.99	1.15	1.06	632000	700000	1	1.11	40934
6413	P36222|CH3L1_HUMAN	2.06	81.81	89300	102000	188000	182000	1	1.14	2.1	2.04	95600	185000	1	1.93	42625
359	Q9UM54|MYO6_HUMAN	2.05	273.07	15100000	15600000	16300000	16500000	1	1.04	1.08	1.09	15300000	16400000	1	1.07	149691
1538	P49753|ACOT2_HUMAN	2.05	232.97	6250000	6440000	6740000	6850000	1	1.03	1.08	1.1	6350000	6790000	1	1.07	53219
1613	P01023|A2MG_HUMAN	2.05	189.77	4500000	4480000	4770000	4830000	1	0.99	1.06	1.07	4490000	4800000	1	1.07	163290
2629	Q8N0X7|SPG20_HUMAN	2.05	152.8	5240000	5080000	4800000	4810000	1	0.97	0.92	0.92	5160000	4800000	1	0.93	72833
7582	Q9P013|CWC15_HUMAN	2.05	127.44	374000	382000	420000	417000	1	1.02	1.12	1.11	378000	418000	1	1.11	26624
3374	Q14696|MESD_HUMAN	2.05	125.4	12700000	12600000	12000000	11700000	1	0.99	0.94	0.92	12700000	11800000	1	0.93	26077
3987	O00443|P3C2A_HUMAN	2.05	118.9	217000	230000	196000	189000	1	1.06	0.9	0.87	224000	193000	1	0.86	190678
4180	P83111|LACTB_HUMAN	2.05	105.84	1810000	1830000	2100000	1970000	1	1.01	1.16	1.09	1820000	2040000	1	1.12	60694
5541	Q8NBQ5|DHB11_HUMAN	2.05	105.26	573000	656000	461000	531000	1	1.14	0.8	0.93	614000	496000	1	0.81	32936
4200	Q969G6|RIFK_HUMAN	2.05	86.38	2860000	2750000	3140000	3070000	1	0.96	1.1	1.08	2800000	3110000	1	1.11	17623
320	Q93008|USP9X_HUMAN	2.04	312.11	7740000	7800000	8430000	8200000	1	1.01	1.09	1.06	7770000	8320000	1	1.07	292278
697	Q5JRX3|PREP_HUMAN	2.04	233.29	14600000	14300000	15500000	15400000	1	0.98	1.06	1.06	14400000	15400000	1	1.07	117413
1719	Q96I99|SUCB2_HUMAN	2.04	190.49	6920000	6950000	6520000	6350000	1	1	0.94	0.92	6940000	6440000	1	0.93	46511
3123	Q9Y2D5|AKAP2_HUMAN	2.04	151.12	688000	796000	642000	745000	1	1.16	0.93	1.08	742000	694000	1	0.93	94661
5609	Q13601|KRR1_HUMAN	2.04	83.83	942000	966000	1060000	1050000	1	1.03	1.13	1.12	954000	1060000	1	1.11	43665
83	P34932|HSP74_HUMAN	2.03	396.17	68100000	67300000	73900000	70900000	1	0.99	1.09	1.04	67700000	72400000	1	1.07	94331
37	Q99832|TCPH_HUMAN	2.03	358.72	81700000	80800000	88500000	85400000	1	0.99	1.08	1.05	81200000	86900000	1	1.07	59367
234	P29144|TPP2_HUMAN	2.03	311.14	17600000	17500000	18800000	18700000	1	0.99	1.07	1.06	17500000	18800000	1	1.07	138350
[truncated: 3,619 more rows]

## Sheet: PCCO V.S. CO-scRNA-seq
sc-freq-PCCO
	Ctrl	PCCO
Neuron_1	0.117736	0.358285
Neuron_2	0.250285	0.244402
RGC_1	0.131409	0.176903
RGC_2	0.0512772	0.0492642
Intermediate Progenitor	0.0174706	0.0828535
Neuron_3	0.0512723	0.0479846
RGC_3	0.175845	0.021753
Astrocytes	0.0105089	0.0285541

## Sheet: PCCO_Virus V.S MOCK-scRNA-seq
sc-freq-PCCO_Virus V.S. MOCK
	PCCO_MOCK	PCCO_Virus
Neuron_1	0.3123	0.357
Neuron_2	0.3394	0.194
RGC_1	0.1708	0.2232
Astrocytes	0.0569	0.0874
Intermediate Progenitor	0.0646	0.0693
RGC_2	0.0348	0.0402
RGC_3	0.0207	0.0032

## Sheet: CO_Virus V.S.MOCK-scRNA-seq
sc-freq-PCCO_Virus V.S. MOCK
	CO_MOCK	CO_Virus
Neuron_1	0.3423	0.3683
RGC_1	0.3394	0.3194
Astrocytes	0.1708	0.1832
Intermediate Progenitor	0.1069	0.0974
Neuron_2	0.0646	0.0693
RGC_2	0.0748	0.0782
