# Supplementary material for: A Human 3D neural assembloid model for SARS-CoV-2 infection
Source: Res Sq. 2021 Feb 12:rs.3.rs-214352. Preprint. [Version 1] doi: 10.21203/rs.3.rs-214352/v1 (PMC7885926; doi:10.21203/rs.3.rs-214352/v1)
Supplement: Supplement [file 8ba6d88f5ea64b113bf39978.xlsx]

## Sheet: Fig. 1I
Percentage of LAMB1	CO												PCCO
	0.0372717	0	0.0197394	0.0528716	0.0529786	0.0116973	0.0656039	0.0370425	0.0151194	0.00776518	0.0274593	0.0152765	12.0388	11.5689	10.4183	8.63189	8.81385	10.2002	11.3612	11.0085	12.06	11.6958	12.9147	12.7565

## Sheet: Fig. 2C
Pericytes infection ratio	MOCK												24h												48h												72h
	0	0	0	0	0	0	0	0	0	0	0	0	4	11.5385	6.45161	22.7273	12.9032	10.3448	7.69231	4.54545	4.54545	2.63158	2.04082	10.7143	33.8235	34.8315	40	38.3562	27.2727	30.3571	27.2727	42.2018	28.3582	27.7778	28.8288	27.2727	69.0476	59.375	62.069	53.8462	58.3333	54.8387	56.8627	66.6667	57.5758	68.9655	76.1905	52.5

## Sheet: Fig. 2D
Pericytes Viral RNA-Load	SET1												SET2												SET3
0h	1	1	1	1	1	1	1	1	1	1	1	1	1	1	1	1	1	1	1	1	1	1	1	1	1	1	1	1	1	1	1	1	1	1	1	1
24h	1.73334	1.64	1.787	1.86	1.94589	1.666	1.76	1.6988	1.5667	1.698	2.989	2.789	2.45	2.65	2.98	3.34	3.91605	3.456	3.94246	2.677	2.89	1.98	2.86005	2.8667	2.09022	2.1987	2.09871	2.34562	2.31111	2.86005	2.876	2.6777	2.8799	3.176	3.6752	3.67292
48h	2.82669	2.877	2.67	2.778	2.887	2.7888	2.679	2.7889	2.8988	2.8765	2.9191	2.9999	2.96684	3.011	3.1988	3.099	3.2134	3.1126	3.49545	3.479	3.398	4.10153	4.1009	4.0009	3.09853	2.96684	3.1192	3.09822	3.76625	3.9811	3.9928	4.06386	4.09918	3.99928	4.0982	4.1987
72h	3.27641	3.198	3.2209	3.178	3.3345	3.71215	3.567	3.5553	3.677	3.54689	3.4598	3.6566	3.95416	4.1002	4.11112	4.2879	3.71215	3.877	3.99888	4.09191	4.92169	5.012	4.98546	5.09082	3.58297	3.66647	3.65523	3.67889	3.78891	3.78829	3.71215	3.68999	3.56982	4.10686	4.0991	3.98287

## Sheet: Fig. 3D
Virus infection ratio		CO												PCCO
	MOCK	0.038	0.032	0.029	0.051	0.053	0.028	0.031	0.019	0.022	0.041	0.018	0.022	0.02	0.019	0.033	0.019	0.02	0.017	0.011	0.038	0.039	0.014	0.012	0.008
	Infection	0.9	0.67	0.87	0.83	0.98	1.09	1.1	1.31	1.23	0.9	0.87	1.11	9.36	11.68	9.98	10.09	11.09	9.56	9.98	8.37	8.77	9.98	10.05	12.33

## Sheet: Fig. 3E
CO and PCCO Viral RNA-load		CO												PCCO
	Primer Set 1	3.489	3.588	3.454	3.233	3.123	5.34	4.09	3.122	3.056	3.454	4.13	3.47	14.175	14.98	15.23	15.68	14.789	14.298	14.343	15.07	14.988	14.77	15.06	16.09
	Primer Set 2	2.829	2.929	3.134	3.333	3.12	3.198	3.2897	4.09	3.233	3.454	3.36	3.24	55.436	54.436	53.46	55.26	55.23	54.09	54.78	60.09	55.38	57.89	58.88	53.98
	Primer Set 3	3.16	3.17	3.09	3.24	3.15	3.27	3.299	3.67	3.454	3.222	3.338	3.454	52.182	51.98	50.98	49.98	53.04	53.98	51.98	50.99	52.78	53.45	54.09	52.98

## Sheet: Fig. 4C
PCCO: Pericytes/Astrocytes infection ratio	GFAP+ only												Pericytes only												Both positive												All
	19.888	19.089	19.988	18.9622	18.9678	18.9334	23.2775	22.9883	23.0981	17.9898	18.9933	19.0872	50.8379	49.8999	48.9283	49.0987	40.9352	41.0998	42.9088	43.4798	50.9536	49.8999	49.098	49.899	29.2737	29.1178	29.0988	29.0876	28.7879	27.9988	28.9678	25.6198	25.9182	25.8879	31.0632	31.9982

## Sheet: Fig. 3L
Number of Pericytes and Astrocytes in Zone1 and Zone2		Pericytes
	Zone-1	22.1	26.7	19.98	22.44	19.18	18.91	20.18	19.88	16.87	15.92	20.98	19.99	16.87	15.98	22.11	19.89	14.56	15.69	18.98	19.98	29.98	11.98	10.98	13.28
	Zone-2	5.76	3.22	7.98	4.54	6.34	5.98	4.56	3.12	3.87	3.96	4.22	4.19	8.98	10.34	9.88	8.16	11.22	8.93	7.84	8.99	10.98	12.01	6.66	12.19

## Sheet: Fig. 3M
Infection ratio	Pericytes												aSTROCYTES
ZONE-1	89.11	64.56	89.91	89.3	85.2	91.01	73.32	80.98	79.97	88.19	87.66	72.34	10.56	10.22	13.98	13.87	13.921	13.224	16.123	13.422	12.89	15.13	14.87	4.19
ZONE-2	1.76	1.22	1.98	2.54	2.34	2.98	2.11	1.12	1.87	1.96	2.22	1.19	68.98	70.44	69.88	68.16	71.22	58.93	47.84	48.99	50.98	52.01	46.66	52.19

## Sheet: Fig. 3O
		PCCO-MOCK												PCCO-Virus
	CC3%	4	2.13	3.44	1.899	5.677	7.999	8.72	9.09	8.9	8.144	6.988	7.098	23.433	24.544	24.363	26.718	26.266	29.08	30.988	31.009	25.64	26.766	27.098	26.989
	TP53%	2	1.788	2.981	1.98	1.887	2.11	1.09	3.092	1.976	2.198	2.118	2.888	20.098	19.989	19.888	18.976	19.022	20.11	17.655	16.978	18.766	18.098	19.08	17.09

## Sheet: Fig. 3P
	mRNA expression	PCCO_MOCK												PCCO_Virus
	ISG15	1	1	1	1	1	1	1	1	1	1	1	1	2.14	2.098	1.876	1.988	1.952	1.989	1.921	1.876	1.785	1.652	1.698	1.56
